# Supplementary material for: The photosystem I supercomplex from a primordial green alga Ostreococcus tauri harbors three light-harvesting complex trimers
Source: eLife journal article supplement (doi:10.7554/elife.84488), 2023-03-23
Supplement: supp [file elife-84488-supp-v1.zip]

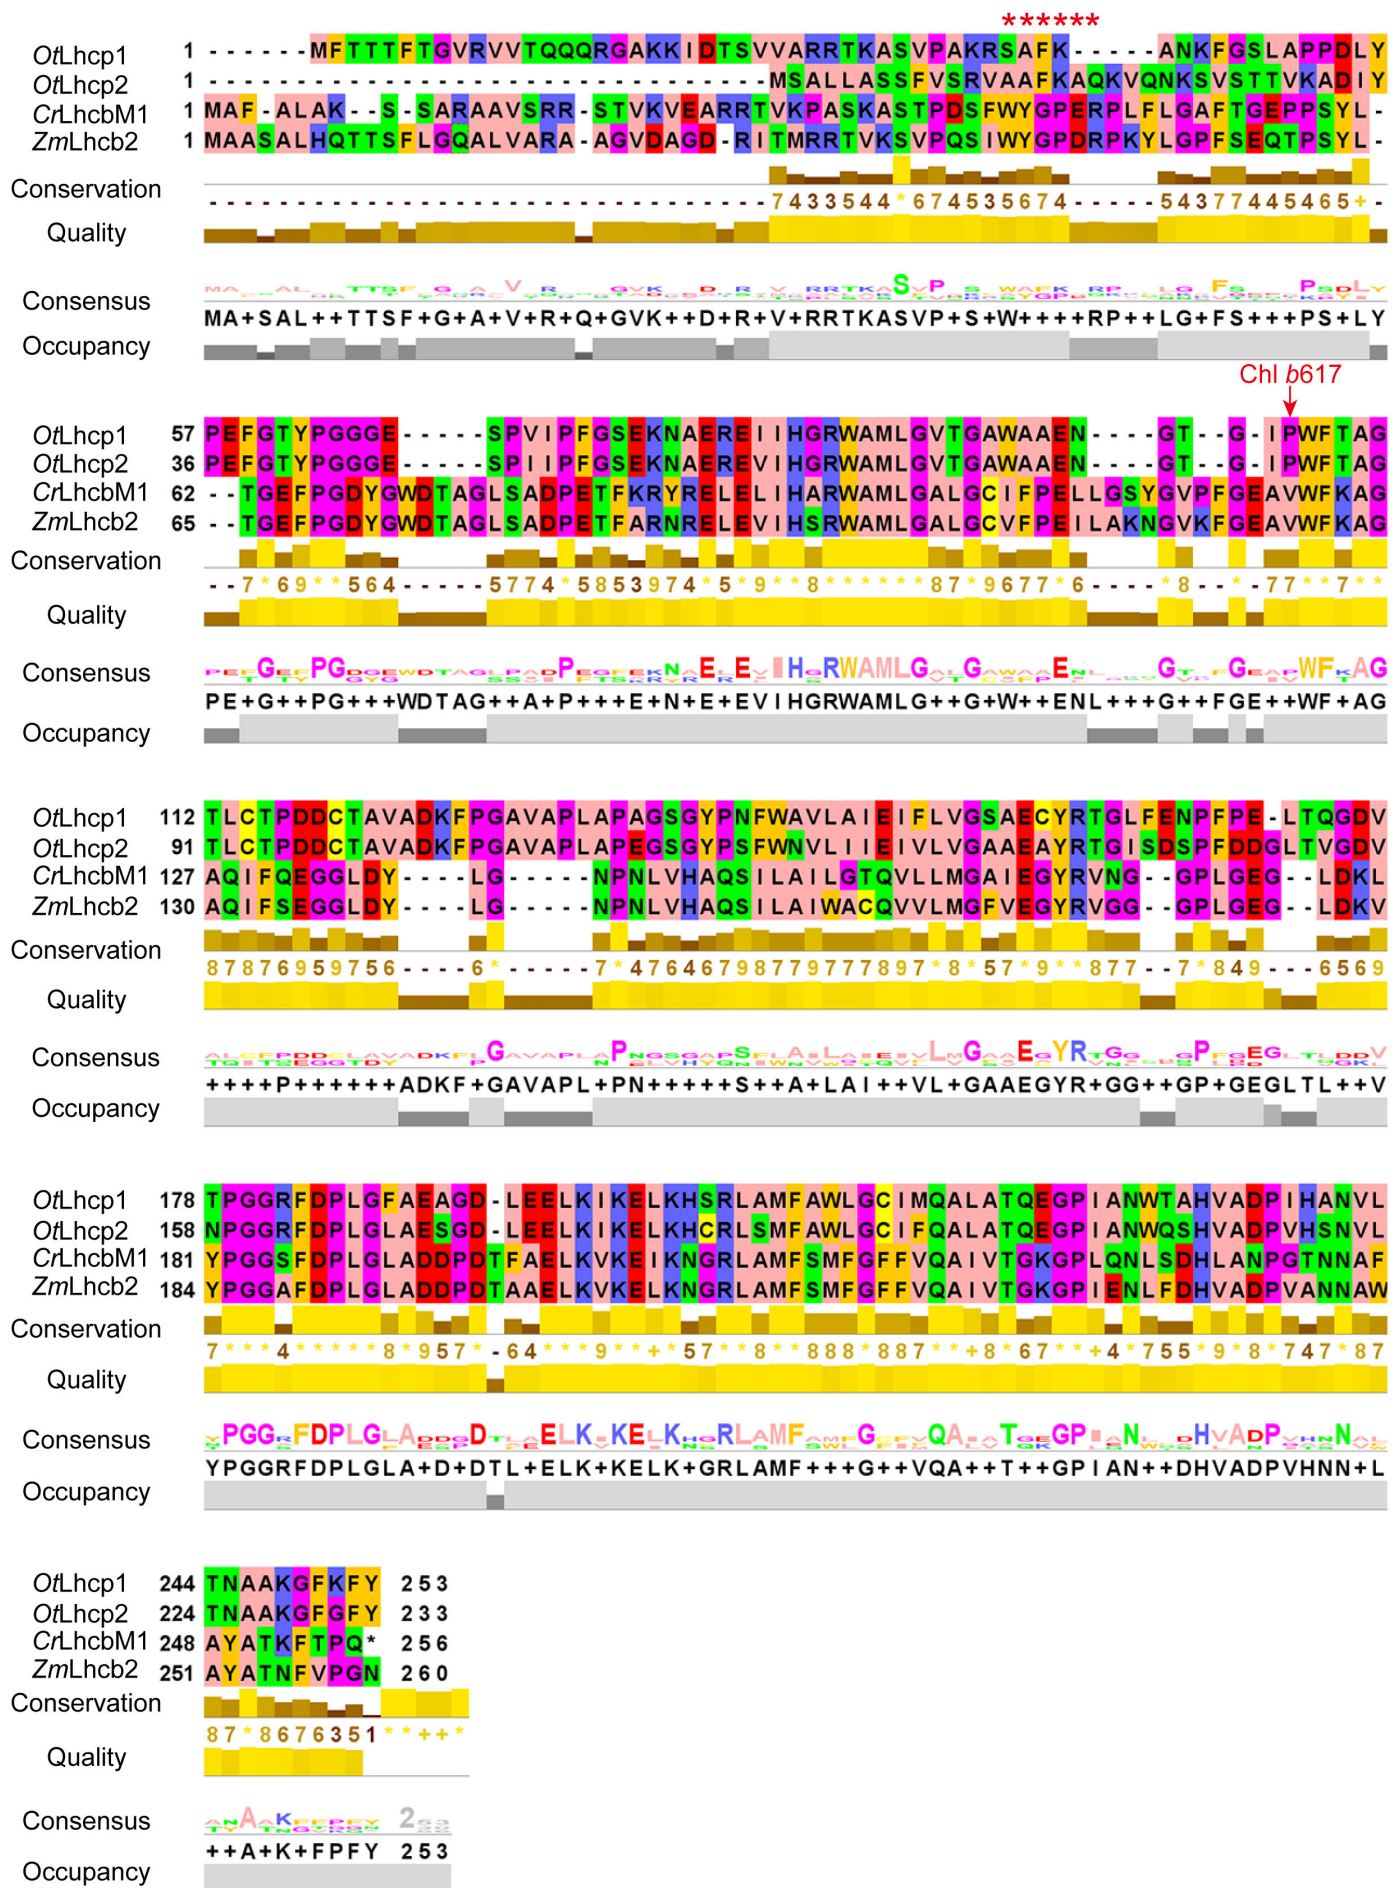

**Figure 8—figure supplement 1.** Sequence alignment of *OtLhcp1* and *OtLhcp2* with *LhcbM1* from *C. reinhardtii* and *Lhcb2* from *Z. mays*. The red arrow indicates the binding site of Chl *b*617 found in *OtLhcp1* and *Lhcp2*. The red asterisk symbols show the position of WYXXXR motif found at the N-terminal regions of *CrLhcbM1* and *ZmLhcb2*, but absent in *OtLhcp1* and *OtLhcp2*.
