# Supplementary material for: The photosystem I supercomplex from a primordial green alga Ostreococcus tauri harbors three light-harvesting complex trimers
Source: eLife journal article supplement (doi:10.7554/elife.84488), 2023-03-23
Supplement: supp [file elife-84488-supp-v1.zip]

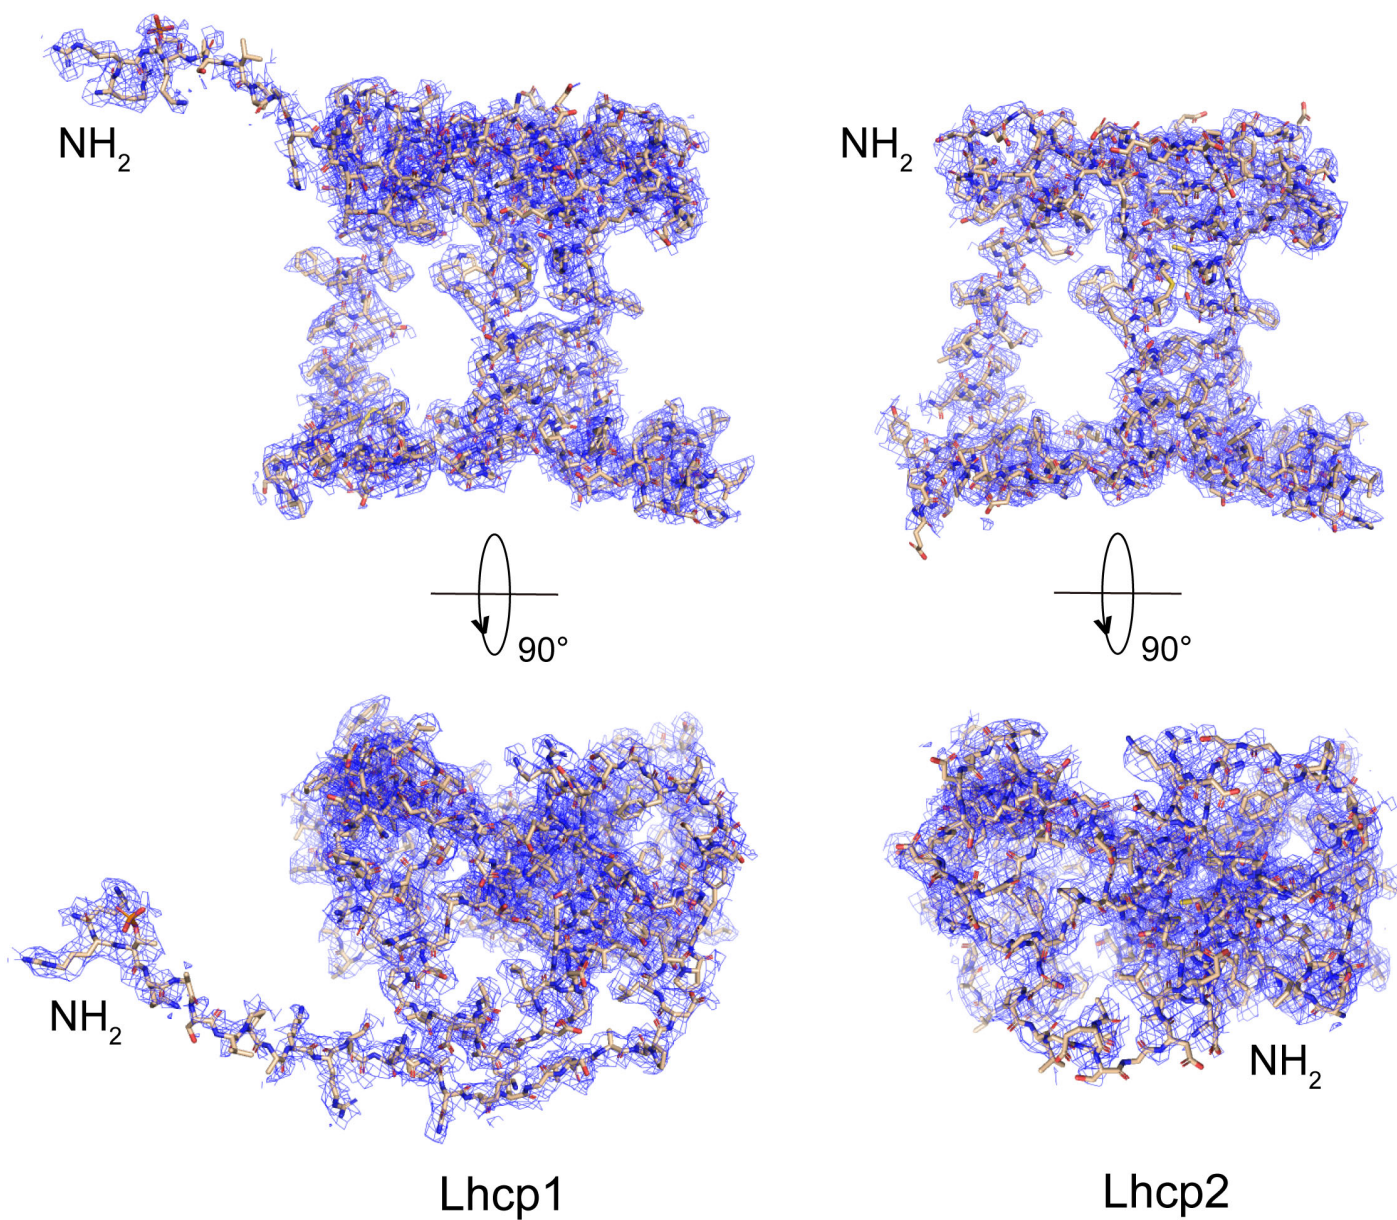

**Figure 7—figure supplement 1. Cryo-EM densities of *OtLhcp1* and *OtLhcp2* proteins.** The overall structure of *OtLhcp1* highly resembles that of *OtLhcp2*, except that the former one has an elongated N-terminal region with a phosphorylated Thr residues. The cofactors are omitted for clarity.
