# Supplementary material for: The photosystem I supercomplex from a primordial green alga Ostreococcus tauri harbors three light-harvesting complex trimers
Source: eLife journal article supplement (doi:10.7554/elife.84488), 2023-03-23
Supplement: supp [file elife-84488-supp-v1.zip]

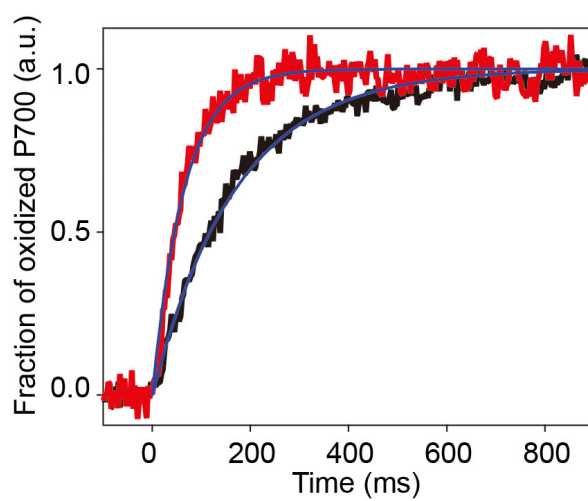

**Figure 1—figure supplement 3. PSI light-harvesting capabilities in the A3 and A3L fractions. .**  
All conditions were the same as in Fig.1c.
