# Supplementary material for: The photosystem I supercomplex from a primordial green alga Ostreococcus tauri harbors three light-harvesting complex trimers
Source: eLife journal article supplement (doi:10.7554/elife.84488), 2023-03-23
Supplement: supp [file elife-84488-supp-v1.zip]

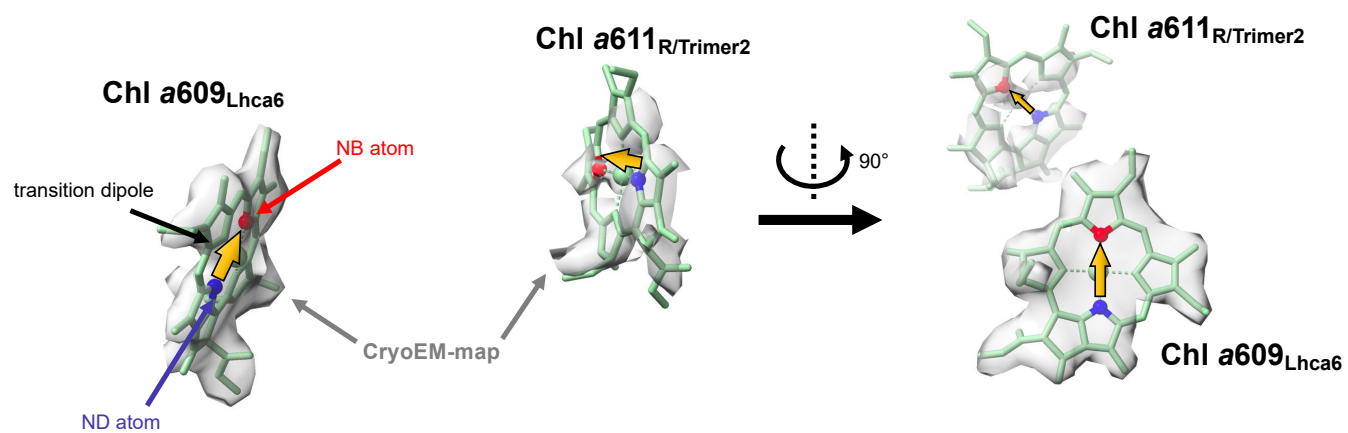

**Figure 10—figure supplement 1. An example of a close chlorophyll pair that has a low orientation factor and a low FRET rate.** Relative orientation of Chl a609<sub>Lhca6</sub> and Chl a611<sub>R/Trimer2</sub> is shown. NB (Red) and ND (blue) atoms, Cryo-EM maps (gray), transition dipoles (yellow arrows).
