# Supplementary material for: The photosystem I supercomplex from a primordial green alga Ostreococcus tauri harbors three light-harvesting complex trimers
Source: eLife journal article supplement (doi:10.7554/elife.84488), 2023-03-23
Supplement: supp [file elife-84488-supp-v1.zip]

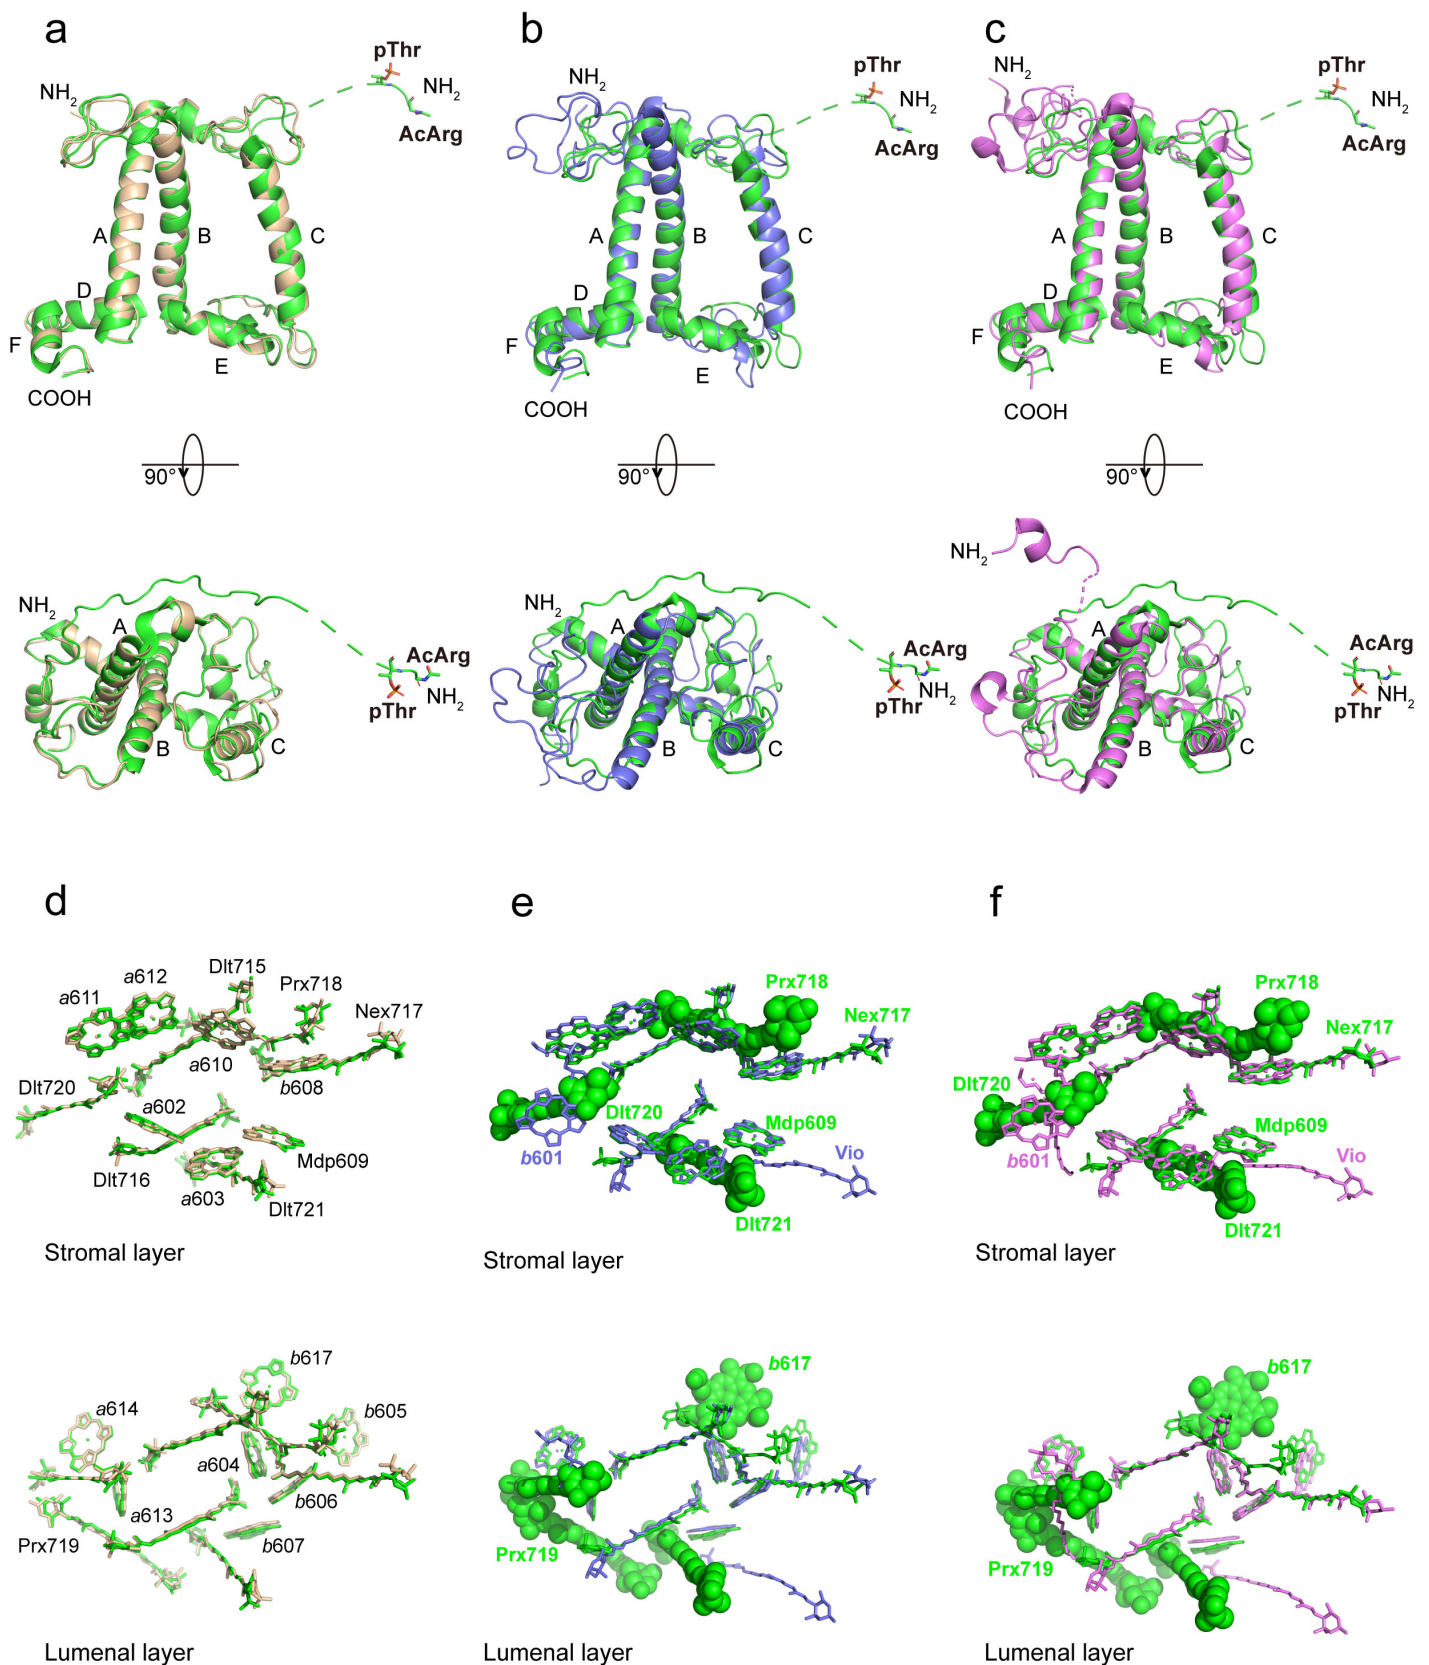

**Figure 7—figure supplement 2. Superposition of the *OtLhcp1* structure with those of *OtLhcp2* (a, d), *ZmLhcb1*(b, e) and *CrLhcbM1* (c, f). a-c**, The apoprotein of *OtLhcp1* superposed with those of *OtLhcp2* (a), *ZmLhcb1* (b) and *CrLhcbM1* (c). Color codes: green, *OtLhcp1*; golden, *OtLhcp2*; light blue, *ZmLhcb1*; violet, *CrLhcbM1*. The N-terminal phosphorylated Thr residues are highlighted as stick models. A, B and C indicate the three transmembrane helices in Lhcp/Lhcb apoproteins. Upper row, side view along membrane plane; lower row, top view from stromal side along membrane normal. The dash lines indicate the flexible linker regions not observed in cryo-EM maps. **d-f**, The distribution of pigment molecules in *OtLhcp1* in comparison with those in *OtLhcp2* (d), *ZmLhcb1* (e) and *CrLhcbM1* (f). In the upper row, only chlorophyll molecules within the layer close to stromal surface are shown, while the lower row shows the chlorophyll molecules within the layer close to the luminal surface. In e and f, The chlorophyll and carotenoid molecules only present in *OtLhcp1* but not in *ZmLhcb1* or *CrLhcbM1* are highlighted as sphere models. Those present in *ZmLhcb1* and *CrLhcbM1* but absent in *OtLhcp1* are indicated by the light blue or violet labels (LHG, b601 and Vio).
