# Supplementary material for: The photosystem I supercomplex from a primordial green alga Ostreococcus tauri harbors three light-harvesting complex trimers
Source: eLife journal article supplement (doi:10.7554/elife.84488), 2023-03-23
Supplement: supp [file elife-84488-supp-v1.zip]

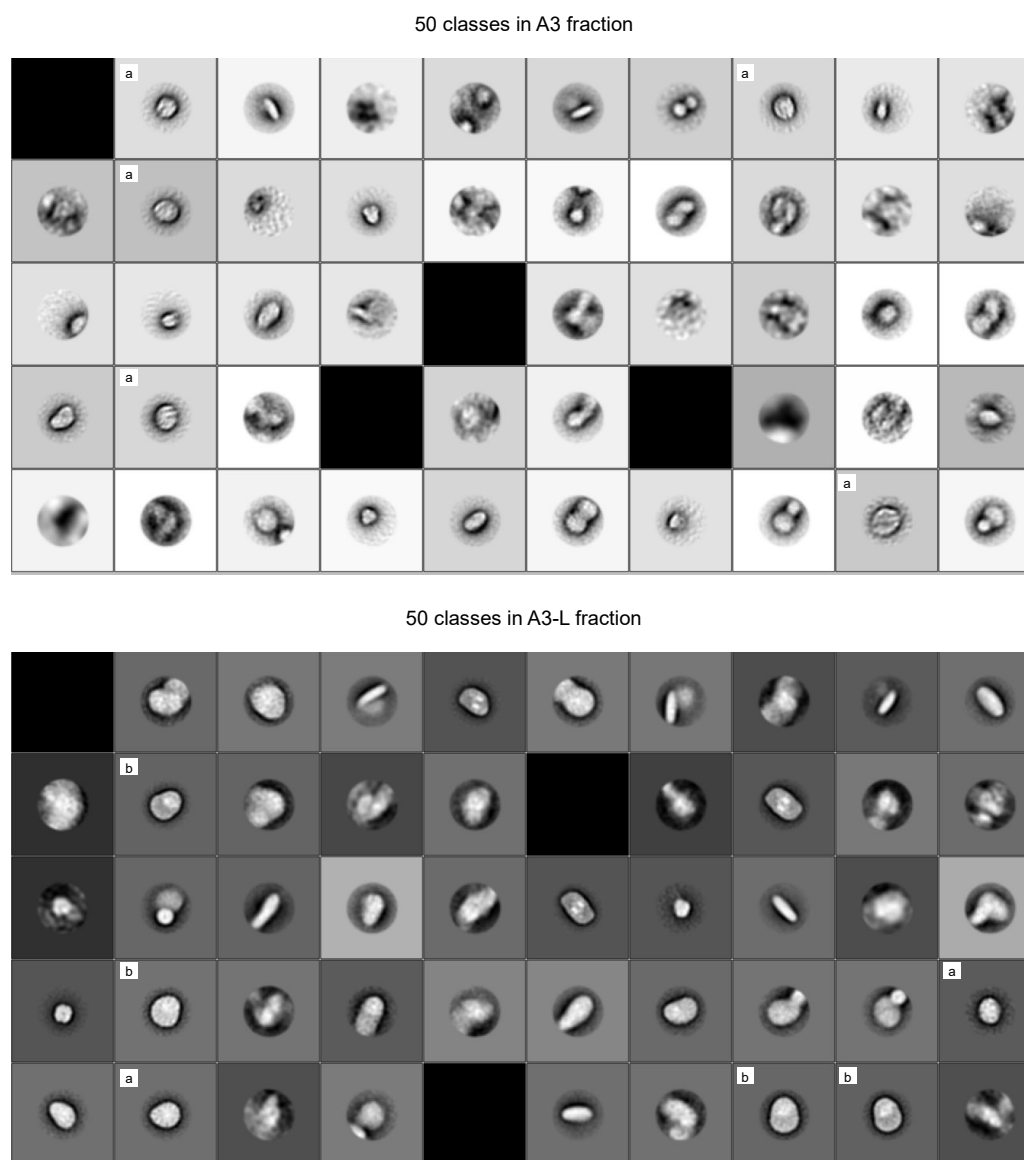

**Figure 1—figure supplement 4. Structural analysis of A3 and A3L fractions by negative staining EM.** The particles in the A3 and A3L were negatively stained with uranyl acetate and the projection images of EM single particles were 2D classified (Table S3). While most of the PSI in A3 was smaller supercomplex, 70% of the PSI in A3L were larger supercomplex. Two-dimensional classification results of the particles from the A3 and A3L fractions are shown. 9068 particles from the A3 fraction and 10331 particles from A3L were classified into 50 classes. **a** and **b** labels represent classes categorized into small PSI, large PSI, respectively.
