# Supplementary material for: The photosystem I supercomplex from a primordial green alga Ostreococcus tauri harbors three light-harvesting complex trimers
Source: eLife journal article supplement (doi:10.7554/elife.84488), 2023-03-23
Supplement: supp [file elife-84488-supp-v1.zip]

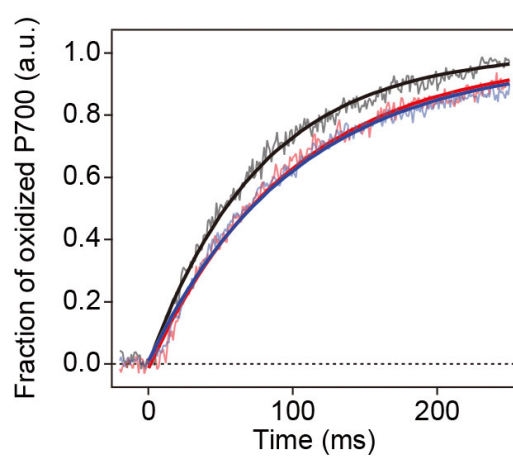

**Figure 11—figure supplement 2. Light-induced P700 oxidation kinetics measured under  $22 \mu\text{mol photon m}^{-2}\text{s}^{-1}$ . All conditions were the same as in Fig.11c.**
