# Supplementary material for: The photosystem I supercomplex from a primordial green alga Ostreococcus tauri harbors three light-harvesting complex trimers
Source: eLife journal article supplement (doi:10.7554/elife.84488), 2023-03-23
Supplement: supp [file elife-84488-supp-v1.zip]

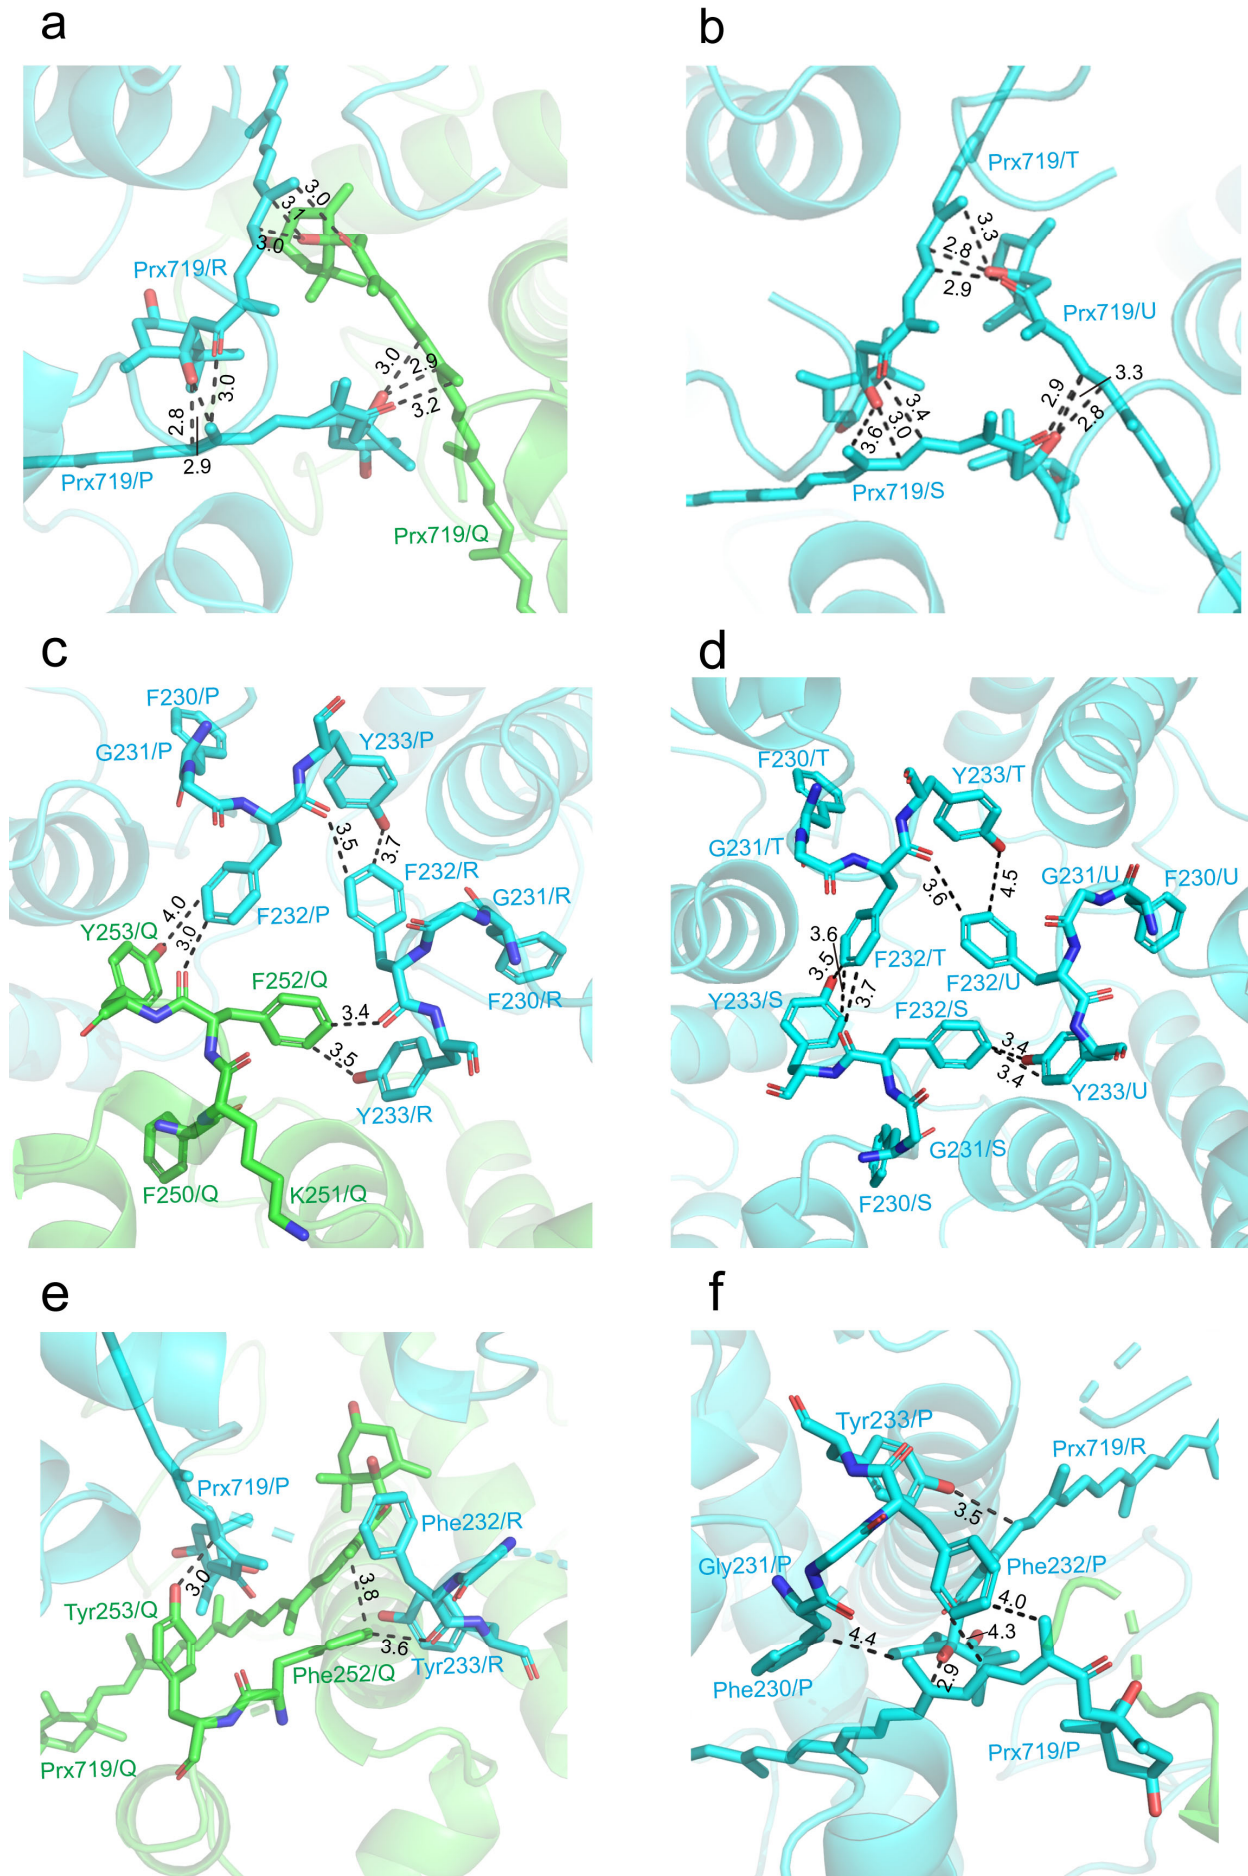

**Figure 8—figure supplement 2. The detailed features at the trimerization interfaces of Trimers.** a and b, Van der Waals and hydrophobic interactions among the three symmetry-related Prx719 molecules in the Lhcp1-(Lhcp2)<sub>2</sub> trimer (a) and (Lhcp2)<sub>3</sub> trimer (b). c and d, Interactions among the adjacent C-terminal motifs (FKFY/FGFY) of the Lhcp1-(Lhcp2)<sub>2</sub> trimer (c) and (Lhcp2)<sub>3</sub> (d) trimer. e, f, Extensive interactions between the C-terminal regions of OtLhcp1 (e) or OtLhcp2 (f) and Prx719 from the adjacent monomers. The cartoon representations of OtLhcp1 (green) and OtLhcp2 (cyan) are shown, while the molecules and amino acid residues involved in trimerization are presented as stick models. The numbers labeled nearby the dashed lines indicate the distances (Å) between two adjacent groups.
