# Supplementary material for: The photosystem I supercomplex from a primordial green alga Ostreococcus tauri harbors three light-harvesting complex trimers
Source: eLife journal article supplement (doi:10.7554/elife.84488), 2023-03-23
Supplement: supp [file elife-84488-supp-v1.zip]

Archive with 23 entries (23 files):
- elife_poa_e84488_Figure_1_source_data_1.zip
- elife_poa_e84488_Figure_1_figure_supplement_1_source_data_1.zip
- elife_poa_e84488_Figure_1_figure_supplement_3_source_data_1.zip
- elife_poa_e84488_Figure_11_source_data_1.zip
- elife_poa_e84488_Figure_11_source_data_2.zip
- elife_poa_e84488_Figure_11_figure_supplement_1_source_data_1.zip
- elife_poa_e84488_Figure_11_figure_supplement_2_source_data_1.zip
- elife_poa_e84488_Figure_1_figure_supplement_1.pdf
- elife_poa_e84488_Figure_1_figure_supplement_2.pdf
- elife_poa_e84488_Figure_1_figure_supplement_3.pdf
- elife_poa_e84488_Figure_1_figure_supplement_4.pdf
- elife_poa_e84488_Figure_2_figure_supplement_1.pdf
- elife_poa_e84488_Figure_2_figure_supplement_2.pdf
- elife_poa_e84488_Figure_2_figure_supplement_3.pdf
- elife_poa_e84488_Figure_7_figure_supplement_1.pdf
- elife_poa_e84488_Figure_7_figure_supplement_2.pdf
- elife_poa_e84488_Figure_8_figure_supplement_1.pdf
- elife_poa_e84488_Figure_8_figure_supplement_2.pdf
- elife_poa_e84488_Figure_10_figure_supplement_1.pdf
- elife_poa_e84488_Figure_10_figure_supplement_2.pdf
- elife_poa_e84488_Figure_11_figure_supplement_1.pdf
- elife_poa_e84488_Figure_11_figure_supplement_2.pdf
- elife_poa_e84488_Supplementary_file_1.docx
