# Supplementary material for: The photosystem I supercomplex from a primordial green alga Ostreococcus tauri harbors three light-harvesting complex trimers
Source: eLife journal article supplement (doi:10.7554/elife.84488), 2023-03-23
Supplement: supp [file elife-84488-supp-v1.zip › elife_poa_e84488_Figure_2_figure_supplement_2.pdf]

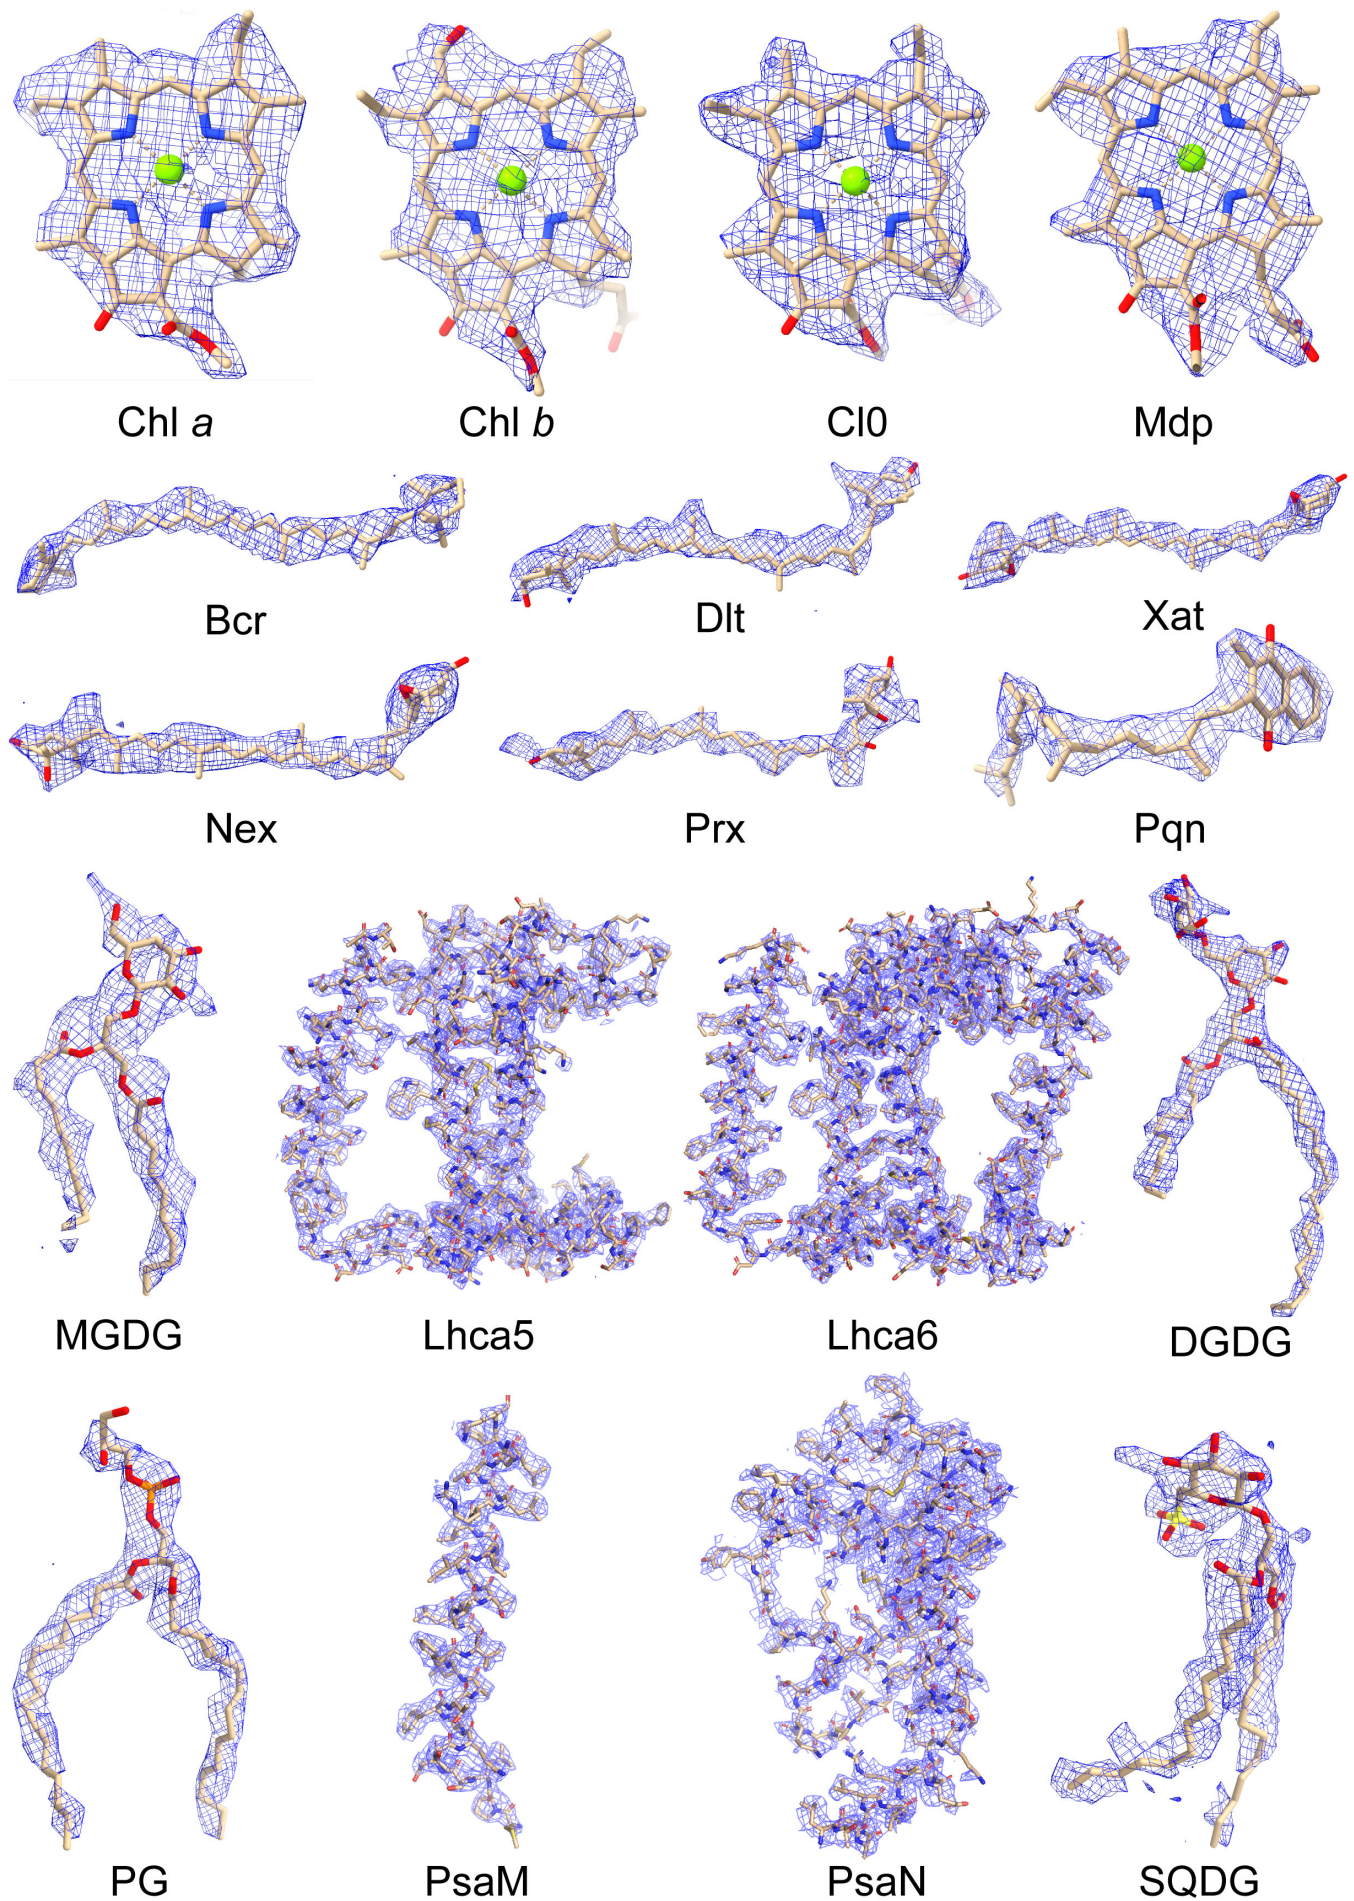

**Figure 2—figure supplement 2. Cryo-EM densities of various cofactors and protein subunits found in the PSI-LHCI-Lhcp supercomplex of *O. tauri*.** CLA, chlorophyll *a*; CHL, chlorophyll *b*; CL0, a chlorophyll *a* isomer of the special pairs of Chl *a* in the reaction center; DVP, Mg-2,4,-divinyl-phaeoporphyrin *a*5 monomethyl ester; BCR, beta-carotene; DLT, dihydrolutein; NEX, neoxanthin; PRX, prasinoxanthin; MGDG, monogalactosyl-diacylglycerol; DGDG, digalactosyl-diacylglycerol; PG, 1,2-dipalmitoyl-phosphatidylglycerol; SQDG, sulfoquinovosyl diacylglycerol.
