# Supplementary material for: The photosystem I supercomplex from a primordial green alga Ostreococcus tauri harbors three light-harvesting complex trimers
Source: eLife journal article supplement (doi:10.7554/elife.84488), 2023-03-23
Supplement: supp [file elife-84488-supp-v1.zip › elife_poa_e84488_Figure_2_figure_supplement_3.pdf]

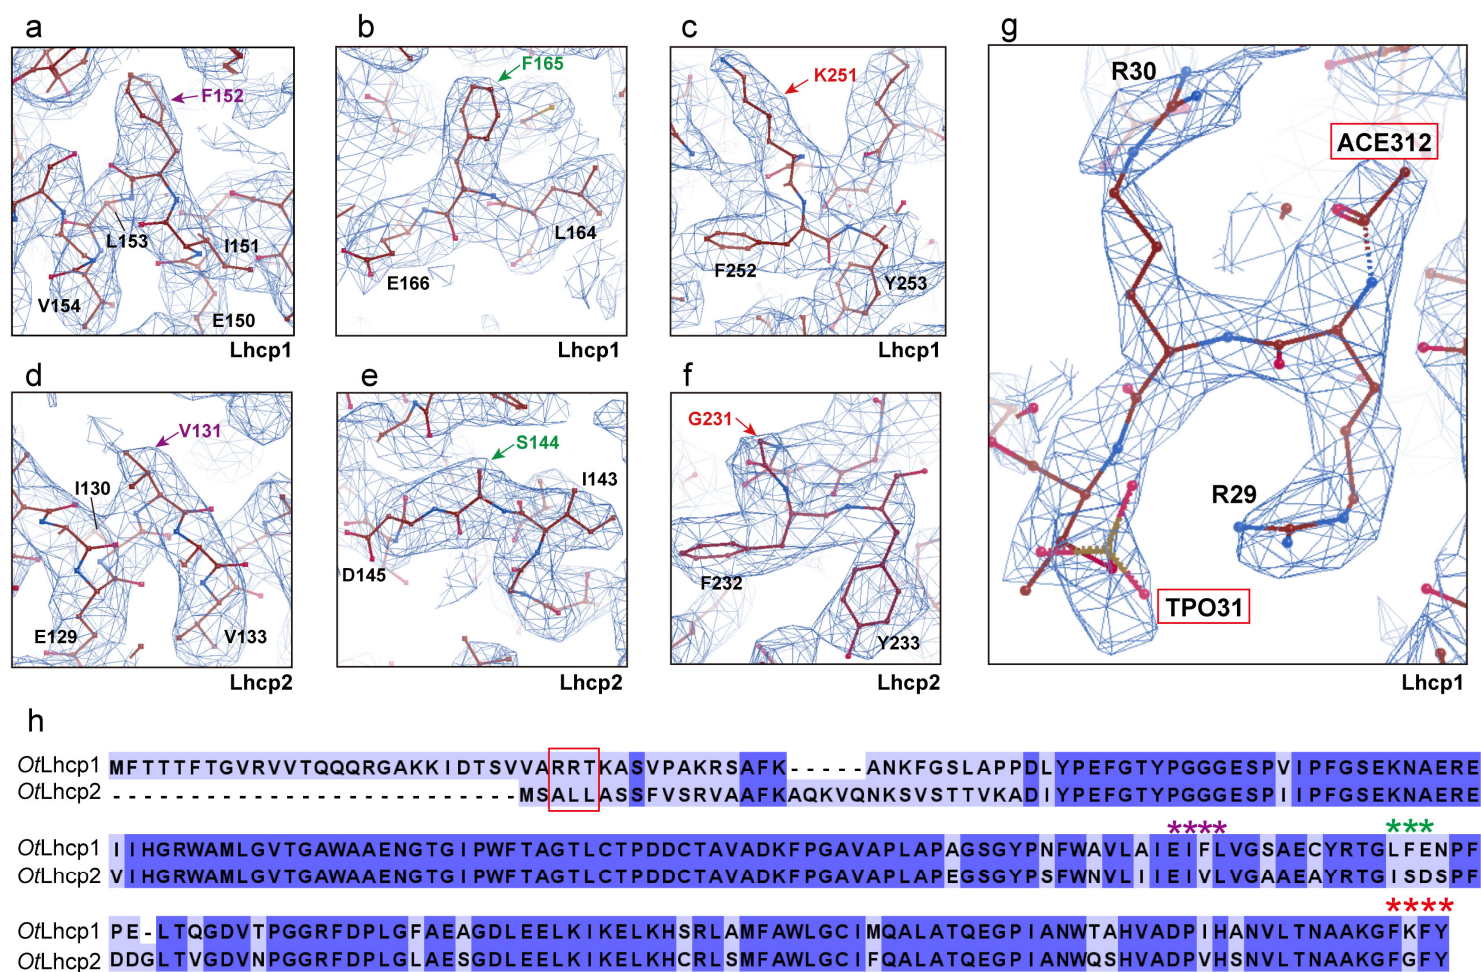

**Figure 2—figure supplement 3. The detailed local cryo-EM map features for identification of *Ot*Lhcp1 and *Ot*Lhcp2.** The densities shown in a-c (Lhcp1) and b-f (Lhcp2) correspond to the three major characteristic motifs (labeled by \* symbols in g) distinguishing Lhcp1 from Lhcp2.
