# Supplementary material for: The photosystem I supercomplex from a primordial green alga Ostreococcus tauri harbors three light-harvesting complex trimers
Source: eLife journal article supplement (doi:10.7554/elife.84488), 2023-03-23
Supplement: supp [file elife-84488-supp-v1.zip › elife_poa_e84488_Figure_10_figure_supplement_2.pdf]

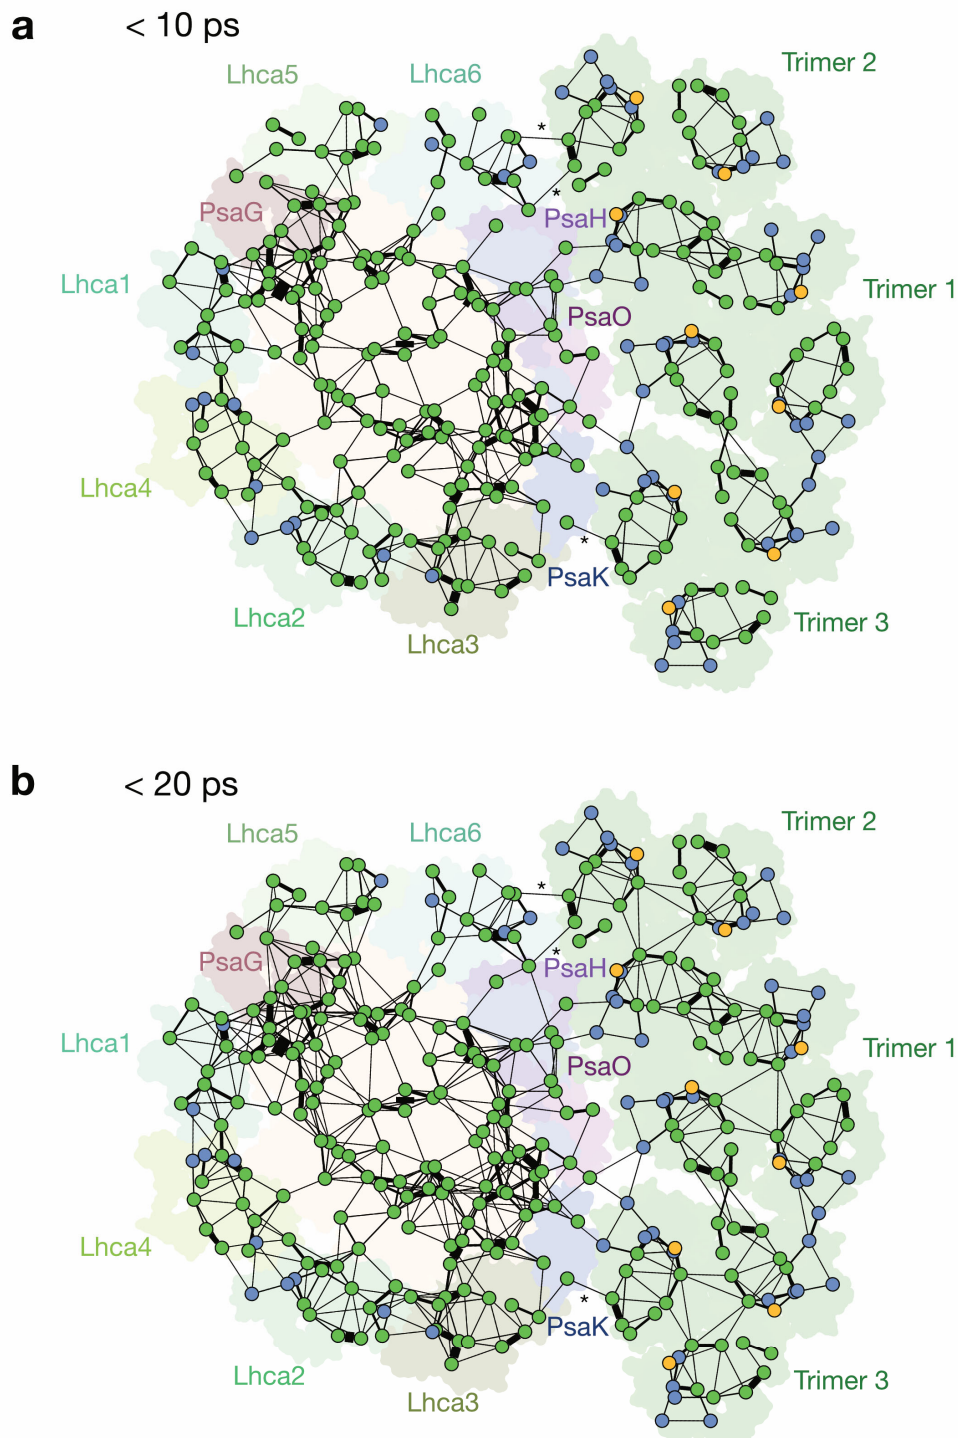

**Figure 10—figure supplement 2. Structure-based analysis of FRET networks within the PSI-LHC-Lhcp supercomplex. a,b,** Organization of Chl molecules within the PSI-LHCI-LHcp supercomplex and the FRET networks presenting efficient FRET processes with lifetimes of less than 10 ps (**a**) and 20 ps (**b**). The views are from the stromal side. The spheres and dotted circles represent each individual Chl molecules and the boundaries for the individual complexes, respectively. The lines between spheres represent the presence of FRET process between adjacent Chls. The width of lines represents the relative FRET rate in each network. The internal part of the PSI core is colored in *wheat*, while the peripheral subunits are highlighted in different colors; PsaG (*brown*), PsaH (*purple*), PsaK (*blue*), PsaO (*pink*), Lhca1-6 and Lhcp1-2 (*various greenish colors*).
