# Supplementary material for: The photosystem I supercomplex from a primordial green alga Ostreococcus tauri harbors three light-harvesting complex trimers
Source: eLife journal article supplement (doi:10.7554/elife.84488), 2023-03-23
Supplement: supp [file Fig.1_FigS3_qdata.xlsx]

## Sheet: Sheet1
time/ms	set2_A3	set2_A3L
-99	-0.00484336	-0.0164888
-96	-0.0192717	0.00482678
-93	-0.00150049	0.00139798
-90	0.0163804	0.039688
-87	0.0136192	0.0342349
-84	-0.0367962	-0.0415358
-81	-0.0361677	0.00744591
-78	0.0259548	-0.0241257
-75	0.00571306	0.012201
-72	-0.00105985	-0.00974858
-69	0.0410906	-0.0394612
-66	-0.0363343	0.0656062
-63	-0.0107274	-0.00813126
-60	-0.00624584	0.0162988
-57	-0.00396839	0.0513438
-54	0.0175905	-0.0340475
-51	-0.0176547	0.016073
-48	0.0207445	-0.0329662
-45	0.00674312	-0.0168626
-42	0.00721777	0.0764674
-39	0.0111299	-0.0420391
-36	-0.00872017	0.0287966
-33	-0.00104327	0.00778912
-30	-0.0308997	-0.0724768
-27	-0.0171601	-0.0164151
-24	0.00781331	0.0247918
-21	0.000244856	-0.00822529
-18	-0.0257573	0.0242145
-15	-0.0156644	-0.0300821
-12	0.0213642	-0.0703579
-9	0.00415463	0.0283967
-6	0.00644971	-0.0088736
-3	0.0401603	0.012149
0	0.0226004	0.0036272
3	0.0441857	0.0433684
6	0.0276334	0.0532669
9	0.0331371	0.0632617
12	0.0385713	0.0597778
15	0.0391216	0.100495
18	0.0660706	0.161715
21	0.0784479	0.264753
24	0.130485	0.263883
27	0.169402	0.324527
30	0.16889	0.298618
33	0.179257	0.367376
36	0.199752	0.434147
39	0.249015	0.414344
42	0.219238	0.476955
45	0.193292	0.491306
48	0.238108	0.525564
51	0.242328	0.52404
54	0.2268	0.55324
57	0.241041	0.569921
60	0.296807	0.685066
63	0.309593	0.637296
66	0.350078	0.647994
69	0.35535	0.67327
72	0.352865	0.714335
75	0.350843	0.765089
78	0.365253	0.721645
81	0.37155	0.761266
84	0.400567	0.752752
87	0.424251	0.711089
90	0.432207	0.746713
93	0.441139	0.806746
96	0.457595	0.762335
99	0.46348	0.805649
102	0.462527	0.799716
105	0.459006	0.795303
108	0.494931	0.87715
111	0.486775	0.851038
114	0.454747	0.800809
117	0.506461	0.81971
120	0.534538	0.837383
123	0.472252	0.915891
126	0.548999	0.857266
129	0.52972	0.858647
132	0.534172	0.834624
135	0.563933	0.867679
138	0.497038	0.933809
141	0.600718	0.837109
144	0.597609	0.877468
147	0.582685	0.921977
150	0.649155	0.888555
153	0.622753	0.932477
156	0.6025	0.875869
159	0.619643	0.892811
162	0.633342	0.883435
165	0.689055	0.865524
168	0.681454	0.999248
171	0.661817	0.894577
174	0.677572	0.961817
177	0.688897	0.90568
180	0.682937	0.984763
183	0.702461	0.914813
186	0.73507	0.941445
189	0.675507	0.898789
192	0.693313	0.952041
195	0.692128	0.984592
198	0.747214	0.940425
201	0.723006	0.979866
204	0.724205	0.96924
207	0.689028	0.988519
210	0.6992	0.952066
213	0.72777	1.04127
216	0.724152	1.0125
219	0.746125	1.03309
222	0.793145	1.03214
225	0.745037	0.907453
228	0.777878	0.892052
231	0.76271	0.971929
234	0.754144	0.890362
237	0.79069	0.957955
240	0.763556	0.933848
243	0.761379	0.901622
246	0.78101	0.99552
249	0.76098	0.965616
252	0.799973	0.998827
255	0.764053	0.950029
258	0.741435	1.02023
261	0.810825	0.948572
264	0.796686	0.995104
267	0.784721	0.978025
270	0.795394	1.06028
273	0.830746	0.996997
276	0.786341	1.04347
279	0.802744	0.968924
282	0.832577	0.989803
285	0.825158	1.05201
288	0.834225	1.02612
291	0.835765	0.963583
294	0.85102	0.987979
297	0.830286	0.986916
300	0.835241	1.02817
303	0.848793	0.99213
306	0.827335	0.924634
309	0.83702	0.974765
312	0.887127	0.915666
315	0.845934	0.941425
318	0.871024	0.963761
321	0.849356	1.10327
324	0.837435	0.966665
327	0.852303	1.00703
330	0.851063	1.07656
333	0.88869	0.996027
336	0.875339	1.03905
339	0.875318	0.974929
342	0.832081	1.00434
345	0.868032	0.974066
348	0.876581	0.974898
351	0.834765	0.987616
354	0.877067	0.995243
357	0.860808	0.981131
360	0.878591	1.02369
363	0.864088	0.981668
366	0.879693	0.982845
369	0.881981	1.01062
372	0.893427	0.958746
375	0.871993	0.927505
378	0.903314	1.01
381	0.890452	1.00583
384	0.896176	0.963166
387	0.868657	0.978038
390	0.885749	1.02736
393	0.882716	0.991953
396	0.9135	0.954463
399	0.913517	0.921857
402	0.899425	0.931937
405	0.902405	1.01335
408	0.893309	1.01677
411	0.892491	0.975528
414	0.914883	1.02177
417	0.854666	0.990465
420	0.89143	1.00746
423	0.905073	1.02169
426	0.914457	0.991967
429	0.89364	0.971466
432	0.901624	0.976715
435	0.867576	0.950938
438	0.928644	1.00219
441	0.929531	1.02318
444	0.929173	1.05506
447	0.902708	1.00901
450	0.937338	0.992281
453	0.900132	1.0297
456	0.948913	0.971764
459	0.911214	0.970927
462	0.903728	0.92907
465	0.933941	0.92431
468	0.934949	0.916614
471	0.897394	0.942192
474	0.904165	0.939297
477	0.8971	0.988695
480	0.896598	1.04545
483	0.912175	0.957401
486	0.935648	0.987531
489	0.880792	0.955129
492	0.878678	0.982535
495	0.889018	0.960825
498	0.887397	0.981162
501	0.953311	0.998006
504	0.927058	0.953717
507	0.916064	0.926381
510	0.909626	0.920983
513	0.94955	0.959943
516	0.941689	0.96424
519	0.923634	1.01161
522	0.920571	0.972065
525	0.937231	0.92603
528	0.920794	0.971696
531	0.930377	0.999827
534	0.945513	0.94978
537	0.949028	0.964032
540	0.890099	0.958014
543	0.90298	0.970753
546	0.9093	1.01689
549	0.917134	0.954804
552	0.916381	0.980186
555	0.911814	0.979646
558	0.926564	1.01803
561	0.911289	1.00493
564	0.941579	0.95421
567	0.926371	0.934245
570	0.982163	0.9644
573	0.959155	0.95783
576	0.936156	0.931246
579	0.944165	1.00937
582	0.947085	0.99852
585	0.932674	1.02323
588	0.970502	1.01183
591	1.00008	0.958089
594	0.964747	0.970719
597	0.97046	1.0221
600	0.987434	1.01357
603	0.984585	0.979563
606	0.931185	0.947349
609	1.00363	1.02906
612	0.97124	0.943128
615	0.944133	1.03464
618	0.97513	0.982516
621	0.902827	1.02758
624	0.979774	0.981698
627	0.974639	0.996464
630	1.00149	0.980393
633	0.933722	0.941405
636	0.982725	0.930135
639	0.941715	0.966931
642	0.953066	0.936111
645	0.991964	0.945939
648	0.931447	1.02038
651	0.968079	1.01071
654	0.976592	0.961908
657	0.967987	0.987171
660	0.947004	1.04033
663	1.00216	1.05115
666	0.967333	1.0331
669	1.00437	1.05848
672	0.964243	0.973514
675	0.9508	1.06446
678	0.966262	1.01111
681	0.96441	1.00163
684	0.962362	1.02345
687	0.960915	1.03127
690	1.0068	1.03502
693	0.990305	0.983668
696	0.983364	0.967404
699	0.956312	0.916681
702	0.979779	0.910506
705	0.984279	0.963778
708	1.00105	1.01316
711	0.967197	0.942382
714	0.959982	0.94376
717	0.985119	0.954004
720	0.997027	0.934464
723	0.948503	0.958523
726	0.97656	0.968542
729	0.961548	1.03218
732	0.975974	1.01404
735	0.955341	1.01126
738	0.964583	1.00186
741	0.979002	1.02533
744	0.95989	0.998971
747	0.962031	0.965101
750	0.984508	0.963043
753	0.962203	0.933641
756	0.969239	0.923388
759	0.9972	0.921891
762	0.947554	0.911825
765	0.942764	0.933654
768	0.92318	0.915691
771	0.958179	0.972
774	0.971508	0.962132
777	0.965478	0.92513
780	0.934188	0.89943
783	0.974466	0.955163
786	0.936064	0.970376
789	0.925249	0.989429
792	0.939927	1.01658
795	0.966158	1.00274
798	0.939505	1.06738
801	0.95684	1.0854
804	0.998508	1.04877
807	0.973564	0.966792
810	0.968043	0.987581
813	0.944214	0.966889
816	0.958413	1.05452
819	0.942129	1.00013
822	0.976189	1.07182
825	0.951064	1.04359
828	0.978057	1.02072
831	0.957436	1.0295
834	0.977296	1.05742
837	0.985992	1.02376
840	0.975546	0.982561
843	1.0038	1.00172
846	0.965875	0.983314
849	1.01224	1.00912
852	0.994768	1.10476
855	1.01058	1.02457
858	1.01902	1.02124
861	0.994315	0.977994
864	1.04385	0.916617
867	1.00176	0.949701
870	0.978672	1.02388
873	1.02535	0.947197
876	1.01231	0.980958
879	1.02154	0.953294
882	1.03005	0.984599
885	0.994676	0.99211
888	0.962423	0.960971
891	0.963241	0.978238
894	0.992895	0.98338
897	0.95283	0.983543
900	0.980966	1.02944
903	0.986916	0.96862
906	0.98506	0.966963
909	1.02413	1.01159
912	1.01594	1.01583
915	1.0378	1.02303
918	0.995285	1.00429
921	0.961723	0.984207
924	1.03358	0.972329
927	1.01841	1.06317
930	0.993701	0.977215
933	0.99957	1.04255
936	0.995693	0.987109
939	0.991041	1.01145
942	0.961441	1.05815
945	0.977339	1.03191
948	0.979453	1.02413
951	0.996879	0.968177
954	0.978359	0.893419
957	0.972995	0.931103
960	0.988699	0.947384
963	0.993038	0.990266
966	0.990399	0.948061
969	1.00963	0.996682
972	0.990856	1.00386
975	1.03292	1.01066
978	0.99906	0.997708
981	1.00321	1.01386
984	1.02704	1.09274
987	1.03277	1.07823
990	0.98166	0.959178
993	1.02919	0.969708
996	1.00406	1.03164
999	1.01216	1.02478
1002	1.02794	1.06971
