# Supplementary material for: The photosystem I supercomplex from a primordial green alga Ostreococcus tauri harbors three light-harvesting complex trimers
Source: eLife journal article supplement (doi:10.7554/elife.84488), 2023-03-23
Supplement: supp [file Fig.1c_qdata.xlsx]

## Sheet: Sheet1
time/ms	set1_A3	set1_A3L
-99	-0.00728102	0.0278143
-96	0.00438481	0.0197486
-93	0.00571355	0.0453421
-90	-0.0150076	0.0332488
-87	-0.0311882	0.0854749
-84	-0.0290883	-0.0623679
-81	-0.032377	0.0475184
-78	0.00771787	-0.032518
-75	0.0157389	-0.0209809
-72	0.0027555	0.0319116
-69	-0.0222652	0.0033044
-66	0.00538729	0.00433929
-63	-0.0119101	-0.0292822
-60	-0.0115813	-0.0278032
-57	-0.0214774	-0.027008
-54	-0.0153027	0.0616072
-51	-0.00947068	0.0121584
-48	-0.0268788	-0.0786053
-45	0.0346386	-0.013313
-42	0.018481	-0.048774
-39	0.00723836	-0.0148539
-36	-0.00135403	0.00615676
-33	-0.0240133	-0.0305329
-30	0.0484107	-0.00137597
-27	0.0407649	0.00372669
-24	-0.0167222	0.00230946
-21	-0.00911364	-0.0102131
-18	0.00724873	-0.0428128
-15	0.0343899	0.0662603
-12	0.0174692	-0.00178051
-9	0.00308219	-0.0532516
-6	0.0223521	0.00574088
-3	0.00118531	0.032776
0	0.000791407	0.0338495
3	-0.00539241	0.0330697
6	0.018911	-0.0193631
9	0.0128876	0.0340642
12	0.0847261	0.0840905
15	0.108601	0.125841
18	0.132198	0.127087
21	0.158007	0.245516
24	0.166811	0.255618
27	0.226885	0.374777
30	0.232889	0.414955
33	0.216157	0.385188
36	0.275768	0.423438
39	0.275189	0.413751
42	0.324694	0.533518
45	0.318128	0.579494
48	0.293181	0.573778
51	0.393165	0.549511
54	0.364116	0.647442
57	0.375486	0.661327
60	0.384408	0.709851
63	0.40022	0.739222
66	0.426129	0.710091
69	0.435076	0.733801
72	0.462247	0.783266
75	0.468681	0.700471
78	0.499949	0.781746
81	0.507595	0.790241
84	0.486758	0.854511
87	0.514541	0.792853
90	0.498275	0.819561
93	0.542955	0.824582
96	0.553683	0.921541
99	0.552535	0.885655
102	0.613951	0.876502
105	0.564842	0.815988
108	0.590553	0.961623
111	0.56601	0.948559
114	0.624476	0.9011
117	0.639973	0.947192
120	0.609045	0.895576
123	0.661146	0.918933
126	0.612254	0.923934
129	0.626701	0.960642
132	0.685868	0.992269
135	0.671412	0.901172
138	0.687607	0.845847
141	0.683525	0.923775
144	0.713783	0.939662
147	0.663682	0.932952
150	0.707845	0.985456
153	0.695349	0.950668
156	0.696439	0.991385
159	0.714488	0.981507
162	0.708948	0.992877
165	0.715929	0.967822
168	0.777922	0.984152
171	0.74025	0.997502
174	0.710005	0.958492
177	0.728804	1.0266
180	0.761867	0.969821
183	0.740135	1.05071
186	0.782298	0.981057
189	0.756193	1.0477
192	0.785966	1.01515
195	0.768221	1.01907
198	0.748816	0.975897
201	0.808169	0.982558
204	0.797498	0.964614
207	0.776923	0.999756
210	0.812845	1.03574
213	0.768555	1.08018
216	0.795176	1.0274
219	0.806408	1.07459
222	0.801432	1.0324
225	0.834667	1.04959
228	0.811576	1.03043
231	0.83657	1.02277
234	0.818108	0.971526
237	0.836572	1.00859
240	0.844238	0.993247
243	0.864813	0.975041
246	0.834925	1.01398
249	0.847236	0.965305
252	0.832026	1.04521
255	0.838064	1.04043
258	0.865463	1.03133
261	0.850804	1.09014
264	0.846929	1.05946
267	0.882877	1.07247
270	0.880812	0.983769
273	0.899644	1.05584
276	0.894518	1.01234
279	0.904689	1.08792
282	0.919472	1.02338
285	0.934278	1.00533
288	0.909891	1.03311
291	0.879372	0.924703
294	0.86726	1.05925
297	0.893047	1.08057
300	0.89198	1.03531
303	0.943293	1.04194
306	0.953187	1.04594
309	0.938825	1.08059
312	0.923452	1.08267
315	0.919805	1.04328
318	0.938445	0.991364
321	0.915079	1.06546
324	0.896601	1.04477
327	0.918457	1.08465
330	0.903273	1.01019
333	0.903678	1.05361
336	0.913765	1.09713
339	0.943881	1.04275
342	0.973178	1.02749
345	0.934069	0.962174
348	0.944282	0.997574
351	0.936198	1.03564
354	0.936958	1.04348
357	0.91671	0.984562
360	0.917001	1.09302
363	0.937102	1.04331
366	0.916869	1.01187
369	0.959404	1.01714
372	0.951745	1.0058
375	0.962474	0.965122
378	0.973425	1.02184
381	0.932896	1.09681
384	0.970523	1.06421
387	0.927876	1.02676
390	0.959026	1.02795
393	0.942827	0.951049
396	0.962525	1.00662
399	0.964002	0.994419
402	0.974832	0.987545
405	0.966362	0.925227
408	0.971789	0.92818
411	0.960723	1.01477
414	0.933115	0.987613
417	0.963104	0.953662
420	0.943382	0.932697
423	0.952357	1.00353
426	0.948619	1.02732
429	0.932114	0.97594
432	0.960004	1.05536
435	0.989453	1.07285
438	0.969282	1.0032
441	0.973515	0.974607
444	0.944395	1.04117
447	0.96563	1.01127
450	0.980253	1.0297
453	0.95377	1.00707
456	0.951374	1.08892
459	0.967701	0.983713
462	0.970543	1.02399
465	0.987581	1.00743
468	0.975686	1.04752
471	0.968242	1.06534
474	0.98262	1.01056
477	0.972255	1.08053
480	1.00237	1.09001
483	0.976044	1.06145
486	0.975105	1.07577
489	1.01493	1.01213
492	0.974438	1.06036
495	0.997479	1.01862
498	0.979328	1.00359
501	0.987217	0.996139
504	1.0001	0.992915
507	0.990927	0.960277
510	1.01139	1.00049
513	0.987168	0.958596
516	0.994995	1.04148
519	1.00838	1.00202
522	0.997512	0.994664
525	0.978506	0.999523
528	0.975342	1.08024
531	0.989181	1.01276
534	0.978438	1.03624
537	0.968037	0.986667
540	1.00137	1.00513
543	0.979956	1.00821
546	0.98259	1.05266
549	0.999905	1.0414
552	1.01348	1.05035
555	0.981205	1.03986
558	0.997758	1.04607
561	0.966444	0.994791
564	0.945576	1.07782
567	0.969408	0.993909
570	0.98408	1.00909
573	0.964051	1.00389
576	0.954921	1.03493
579	0.976619	1.02679
582	0.984565	1.06096
585	0.996027	1.01432
588	0.993049	0.985912
591	1.01924	1.07796
594	1.00988	1.05553
597	0.990006	1.02095
600	0.962439	1.07627
603	1.02881	1.03292
606	0.977643	1.06128
609	1.016	1.0207
612	1.00679	1.04393
615	0.972552	1.05151
618	0.991265	1.07991
621	0.992539	0.996714
624	0.994773	0.99632
627	1.00099	1.0686
630	0.98911	1.00371
633	1.00437	1.0298
636	1.01626	1.06038
639	1.01937	1.04795
642	1.00609	1.06789
645	1.00414	1.00609
648	1.00343	1.01843
651	0.986445	1.00833
654	1.00434	1.03205
657	1.01841	1.09715
660	0.982859	1.01681
663	1.01406	1.06811
666	0.997668	0.997011
669	0.96553	1.08607
672	1.00028	1.08298
675	1.01316	0.972727
678	0.999257	1.08142
681	0.976772	1.04883
684	1.00559	0.961418
687	0.989328	0.984608
690	0.999256	0.984875
693	0.993889	1.03301
696	1.0023	1.0195
699	1.00905	1.04258
702	1.00795	1.04751
705	1.00224	1.0523
708	0.972801	1.04354
711	1.00087	1.00717
714	1.00174	1.03064
717	0.994263	1.00334
720	1.00546	0.972544
723	1.0013	1.09302
726	1.02338	0.966681
729	1.0058	0.965977
732	0.98596	1.03315
735	1.00426	1.01442
738	0.982542	1.00221
741	1.02198	1.00177
744	1.00267	1.02345
747	0.99829	0.963287
750	1.00239	1.14899
753	0.988375	1.01742
756	0.985132	1.0089
759	0.983293	1.071
762	1.01272	0.986154
765	0.958961	0.999709
768	0.989974	1.02867
771	0.994146	0.985039
774	1.00564	1.07153
777	0.998043	0.996564
780	0.994435	1.03102
783	1.00332	1.04162
786	0.996793	0.983286
789	0.975457	1.05537
792	0.989531	1.02587
795	0.982568	0.990779
798	0.960277	0.944186
801	0.994253	1.07092
804	0.981361	1.06754
807	0.982641	0.992897
810	1.00274	1.06426
813	0.974892	0.937941
816	0.973613	1.08335
819	1.00393	1.06268
822	1.01672	1.07211
825	1.00883	1.0266
828	1.02402	1.03995
831	1.01303	1.00027
834	0.99258	1.11121
837	0.988641	1.14636
840	1.0018	1.06734
843	1.00409	1.03318
846	0.993275	1.02373
849	1.00746	1.02738
852	1.01507	0.995165
855	0.992045	1.05791
858	1.02057	1.04005
861	1.0088	1.06304
864	1.0047	1.09229
867	1.00026	0.987882
870	0.999457	1.10313
873	1.00624	1.00814
876	1.00379	0.973156
879	1.01737	1.06929
882	1.01449	1.04877
885	1.00816	1.02461
888	1.01127	1.02104
891	0.998554	1.01465
894	1.01969	1.00215
897	0.999257	1.04084
900	1.00608	1.05256
903	0.991381	1.12648
906	1.00778	1.04012
909	1.01013	0.990267
912	0.974058	0.967673
915	0.984575	0.981773
918	1.00545	0.992731
921	0.982701	0.983774
924	0.982007	0.969093
927	1.01044	0.91191
930	1.0222	1.01959
933	1.0102	0.982512
936	1.00419	1.03287
939	0.991789	0.9324
942	1.05624	0.961519
945	1.02048	0.894721
948	0.999769	0.99828
951	0.980098	0.994598
954	1.01587	0.967218
957	1.00741	0.953341
960	1.00574	0.998128
963	1.01377	0.94849
966	1.00349	1.06184
969	0.98419	1.04435
972	0.994758	0.986216
975	1.01406	0.97173
978	0.977648	1.05105
981	0.991328	1.04165
984	0.993534	1.06602
987	0.987648	1.05252
990	0.999247	1.03772
993	0.983956	1.02661
996	0.997892	1.01214
999	0.995993	1.00066
1002	0.993466	1.04062
