# Supplementary material for: The photosystem I supercomplex from a primordial green alga Ostreococcus tauri harbors three light-harvesting complex trimers
Source: eLife journal article supplement (doi:10.7554/elife.84488), 2023-03-23
Supplement: supp [file Fig.11_FigS2_qdata.xlsx]

## Sheet: Sheet1
time/ms	set2_LL_22uE	set2_HL-tre_22uE	set2_re-LL_22uE
-100	-0.0180642	-0.0037952	0.00269771
-99	0.0185996	0.0021322	-0.00955966
-98	-0.000981847	0.00763953	0.00390537
-97	0.0147917	-0.0218732	0.00214242
-96	-0.00959878	-0.00921155	-0.00495781
-95	0.0219893	-0.00798065	-0.0168271
-94	-0.0249543	0.00395536	-0.0201842
-93	0.00498904	-0.0162152	-0.0263316
-92	-0.0177931	-0.0380896	0.0208529
-91	0.0370635	-0.00334605	0.0191248
-90	0.0064698	0.016639	-0.0114439
-89	-0.0114532	0.0188672	-0.0143975
-88	0.00600619	-0.00274702	-0.0118485
-87	0.000784795	0.0021312	0.013174
-86	0.00714412	-0.00634948	-0.0108069
-85	0.0141983	0.0101093	-0.00614691
-84	0.0372298	0.00380924	0.0203899
-83	0.00170175	-0.00849321	-0.00323445
-82	0.0244303	0.0173767	-0.0103195
-81	0.0233175	0.013282	-0.00301043
-80	0.0231204	0.0252942	0.0242896
-79	0.00934475	-0.0155831	-0.0282092
-78	0.0125443	0.00357138	0.000772521
-77	0.0156255	-0.0100402	0.00418709
-76	0.0169502	-0.0191389	-0.0144804
-75	0.00252185	0.00908247	0.0185378
-74	0.0166324	0.0165784	0.0263985
-73	0.0259111	-0.00126924	-0.00485122
-72	0.0198707	-0.0114435	-0.0139133
-71	0.0250341	0.0036982	-0.0053737
-70	0.0230225	-0.0246831	0.0131777
-69	0.0437452	-0.00626301	-0.0075779
-68	0.0352582	0.00314153	0.0167379
-67	0.0310106	-0.00372252	-0.00177992
-66	0.0102731	0.00522185	-0.00892133
-65	0.0485713	-0.000796285	-0.00977191
-64	-0.0268873	-0.0109926	-0.00776028
-63	0.00210497	0.00544492	-0.0193033
-62	0.00417119	-0.00462457	-0.00767226
-61	0.00959764	0.00821801	-0.00622814
-60	-0.0178352	0.0102021	-0.0157294
-59	-0.0150184	-0.0236745	0.019206
-58	0.0148373	0.0199061	-0.00135044
-57	0.00272004	0.0117332	-0.0130376
-56	0.0245727	-0.0191607	-0.00458421
-55	0.0539283	0.00654297	-0.00955989
-54	0.00424636	-0.0071771	0.0132537
-53	0.00941083	-0.0247693	0.0152658
-52	-0.00200703	-0.0167453	-0.00283145
-51	0.0102378	-0.0223832	0.0165377
-50	0.00677279	0.0269043	-0.0424617
-49	0.00356978	-0.00501031	-0.000285795
-48	0.0474232	0.0157894	0.00290996
-47	0.0159752	-0.0026791	-0.0041002
-46	0.0226625	0.0321968	0.00043242
-45	0.022396	0.0133692	0.00798814
-44	0.0453171	0.00250315	5.4306e-05
-43	0.0357115	0.00350245	-0.00676329
-42	0.00399578	0.0353767	-0.0147526
-41	0.0226887	0.0379806	0.00850406
-40	0.017956	0.0156177	0.00186862
-39	0.0464721	0.0258922	0.017665
-38	0.067819	0.00261167	0.0130797
-37	0.0671697	-0.00167152	0.0047727
-36	0.0567645	-0.0226577	-0.00690472
-35	0.0252675	0.00859748	0.00157491
-34	0.0462283	0.0012512	0.00350349
-33	0.0612775	0.000915089	0.013957
-32	0.0417154	0.0126012	0.00501505
-31	0.0549318	-0.000212042	-0.0219902
-30	0.00610302	0.00949853	-0.0109262
-29	0.028007	0.0112823	0.00493471
-28	0.0365191	-0.00405587	-0.0225984
-27	0.0294535	-0.00969453	0.000538316
-26	-0.0126355	0.0108332	0.00974951
-25	0.0123427	-0.0348067	-0.0138954
-24	0.0305664	-0.0154989	-0.0101288
-23	-0.00162998	-0.00333954	-0.00141855
-22	-0.0117459	-0.00654047	0.0208911
-21	0.0247401	-0.0131042	-0.0108981
-20	0.0422474	-0.0147419	0.0108191
-19	0.0413783	-0.0260819	0.0233288
-18	0.0363551	-0.00547124	0.000884978
-17	0.00773983	0.00255929	-0.0085448
-16	0.00965458	0.00412053	-0.00332904
-15	-0.0132847	-0.0117292	0.0175892
-14	0.0137062	0.0220629	0.0225825
-13	-0.000654962	-0.00233472	-0.00188786
-12	0.0314332	-0.00145572	0.0129303
-11	0.00709856	-0.0144241	0.00884077
-10	0.0375727	0.000902305	0.0160598
-9	0.0380021	0.0216203	0.00824384
-8	0.0310642	0.0243287	0.0150135
-7	0.0223527	-0.0296182	0.0203851
-6	0.0301085	0.0126912	0.00431787
-5	-0.0172338	0.0179654	-0.00266875
-4	0.0116308	0.0142113	0.00816238
-3	-0.0079278	-0.0308581	-0.00772702
-2	-0.0016015	-0.0174534	-0.0161403
-1	0.0151323	0.0161347	0.0183737
0	-0.0021733	0.0156818	-0.00611704
1	0.0129635	0.0242204	0.0166703
2	-0.00377595	0.0126757	0.0173521
3	0.0109144	0.0360306	0.0189494
4	-0.00365864	0.0349513	0.0327889
5	0.0423453	0.0142582	0.0569412
6	0.0573033	-0.0160763	0.0230505
7	0.0813635	-0.00738814	0.052941
8	0.0521149	0.0318965	0.0396151
9	0.0957554	0.0384914	0.035373
10	0.0878583	0.0472237	0.0576974
11	0.102014	0.0250297	0.0610095
12	0.156954	0.00396112	0.0566328
13	0.147011	0.0609353	0.0728539
14	0.153177	0.107959	0.0683962
15	0.169954	0.0876355	0.117419
16	0.196161	0.107268	0.145091
17	0.210531	0.0764976	0.149949
18	0.193358	0.121422	0.149562
19	0.230923	0.137996	0.149479
20	0.172484	0.136418	0.154568
21	0.213017	0.159524	0.146536
22	0.251772	0.19926	0.169684
23	0.290189	0.196658	0.186677
24	0.311719	0.192199	0.206001
25	0.305769	0.221	0.213915
26	0.298338	0.225192	0.234579
27	0.305821	0.239454	0.247602
28	0.295894	0.222244	0.240754
29	0.330998	0.247528	0.251562
30	0.308614	0.241982	0.276493
31	0.342794	0.25304	0.24199
32	0.32968	0.277484	0.272484
33	0.383885	0.315274	0.288371
34	0.384696	0.282877	0.276903
35	0.368962	0.312728	0.292098
36	0.366302	0.299251	0.326279
37	0.368724	0.327177	0.31123
38	0.41283	0.335885	0.326761
39	0.416751	0.32964	0.340029
40	0.407984	0.343943	0.333455
41	0.460362	0.355034	0.365853
42	0.465836	0.3391	0.387479
43	0.439443	0.350825	0.363379
44	0.475698	0.38524	0.400765
45	0.450938	0.394643	0.401287
46	0.464168	0.413947	0.376405
47	0.519449	0.387626	0.409661
48	0.473103	0.404773	0.423701
49	0.499685	0.367614	0.391567
50	0.513993	0.38911	0.416565
51	0.506032	0.406015	0.417482
52	0.499108	0.423357	0.423144
53	0.510925	0.396412	0.434446
54	0.523295	0.391528	0.42634
55	0.526341	0.437514	0.450064
56	0.509606	0.44161	0.449399
57	0.544159	0.448353	0.462426
58	0.541959	0.437286	0.456105
59	0.566931	0.479662	0.485225
60	0.527959	0.469415	0.470302
61	0.557174	0.470515	0.487619
62	0.559137	0.483774	0.482592
63	0.525931	0.464277	0.474826
64	0.569208	0.45619	0.47845
65	0.584286	0.508755	0.496296
66	0.5699	0.491831	0.498403
67	0.591962	0.509218	0.492286
68	0.618458	0.494157	0.512648
69	0.59232	0.506923	0.502884
70	0.637261	0.518589	0.507704
71	0.614732	0.502244	0.496351
72	0.66011	0.514146	0.5178
73	0.596557	0.529382	0.534123
74	0.607409	0.5406	0.536511
75	0.654237	0.553501	0.55647
76	0.638887	0.542149	0.564637
77	0.651187	0.527418	0.569545
78	0.593693	0.576518	0.564678
79	0.659707	0.5866	0.581917
80	0.697619	0.559169	0.58614
81	0.656244	0.562078	0.570756
82	0.720443	0.557618	0.582883
83	0.701051	0.564496	0.567512
84	0.689655	0.578065	0.574867
85	0.649189	0.57595	0.589168
86	0.691686	0.603455	0.594598
87	0.706653	0.599283	0.603083
88	0.718358	0.644649	0.593716
89	0.746881	0.626969	0.580088
90	0.688002	0.593389	0.574289
91	0.712178	0.601006	0.57522
92	0.711297	0.627445	0.609953
93	0.711389	0.629551	0.603291
94	0.67327	0.641794	0.638751
95	0.748478	0.640584	0.620168
96	0.705289	0.61887	0.636946
97	0.701284	0.617135	0.625679
98	0.745976	0.667518	0.614256
99	0.754338	0.652588	0.604033
100	0.707313	0.664265	0.620617
101	0.719438	0.668482	0.611549
102	0.767525	0.676924	0.599807
103	0.754344	0.646496	0.643626
104	0.736842	0.647024	0.648907
105	0.772467	0.692702	0.655377
106	0.749781	0.676797	0.672255
107	0.768614	0.655949	0.652467
108	0.791583	0.668858	0.654801
109	0.756089	0.662243	0.66646
110	0.788961	0.692888	0.656818
111	0.77303	0.694	0.677015
112	0.758729	0.69123	0.667797
113	0.731994	0.694187	0.685965
114	0.763553	0.73399	0.711487
115	0.762269	0.741501	0.705847
116	0.778776	0.691577	0.693616
117	0.745928	0.725789	0.678701
118	0.801841	0.721955	0.702074
119	0.776397	0.709877	0.703579
120	0.786667	0.69384	0.718934
121	0.744521	0.715828	0.71812
122	0.768414	0.711017	0.69954
123	0.822445	0.70619	0.713525
124	0.778375	0.698776	0.701389
125	0.816247	0.724876	0.69108
126	0.78504	0.703755	0.741037
127	0.810405	0.726579	0.728571
128	0.790982	0.714686	0.721879
129	0.76849	0.735776	0.721784
130	0.807675	0.742653	0.753305
131	0.799809	0.765975	0.750136
132	0.810361	0.787357	0.732002
133	0.83307	0.750934	0.751368
134	0.827749	0.741004	0.74855
135	0.858082	0.726588	0.744014
136	0.840558	0.71287	0.769884
137	0.807977	0.730531	0.775319
138	0.837941	0.757891	0.7675
139	0.849127	0.718373	0.723483
140	0.839483	0.749314	0.741663
141	0.82164	0.761824	0.74285
142	0.857472	0.739949	0.724882
143	0.824677	0.755049	0.768168
144	0.862918	0.764684	0.762428
145	0.840087	0.748303	0.754151
146	0.809335	0.773271	0.752525
147	0.822351	0.766722	0.742573
148	0.831883	0.737781	0.77712
149	0.82897	0.762598	0.749811
150	0.848824	0.77185	0.781212
151	0.819467	0.759621	0.762334
152	0.846953	0.777057	0.777417
153	0.854696	0.728697	0.767777
154	0.844151	0.773014	0.775241
155	0.831232	0.776865	0.765045
156	0.848748	0.778379	0.777908
157	0.845533	0.783374	0.787378
158	0.874998	0.785314	0.784068
159	0.859447	0.815593	0.802055
160	0.890319	0.786863	0.796295
161	0.890921	0.825397	0.779197
162	0.849019	0.794094	0.764541
163	0.87001	0.820701	0.807301
164	0.839518	0.808181	0.776341
165	0.887448	0.830404	0.80824
166	0.890322	0.843239	0.819933
167	0.868511	0.823735	0.814779
168	0.907705	0.784374	0.796302
169	0.905548	0.822102	0.774059
170	0.927745	0.842208	0.779454
171	0.895612	0.7844	0.816301
172	0.91342	0.813627	0.821807
173	0.884306	0.827066	0.808642
174	0.881483	0.820114	0.803859
175	0.872757	0.858064	0.786346
176	0.918263	0.853167	0.800574
177	0.905276	0.82634	0.814815
178	0.904795	0.82527	0.809729
179	0.928619	0.81214	0.798677
180	0.92661	0.840994	0.79837
181	0.875217	0.829248	0.823824
182	0.926328	0.845219	0.808357
183	0.926206	0.837479	0.775999
184	0.902995	0.857395	0.812502
185	0.897432	0.849036	0.825489
186	0.910976	0.846301	0.815022
187	0.867909	0.857208	0.829439
188	0.892242	0.841258	0.810583
189	0.904115	0.832609	0.838279
190	0.912963	0.82315	0.812368
191	0.880953	0.858508	0.794245
192	0.886489	0.851398	0.809031
193	0.885858	0.820696	0.835695
194	0.928198	0.861902	0.820253
195	0.912262	0.861306	0.842198
196	0.897243	0.842562	0.819595
197	0.907197	0.822186	0.821005
198	0.924505	0.839324	0.83538
199	0.943456	0.837269	0.837494
200	0.879573	0.844337	0.852117
201	0.900577	0.860927	0.819523
202	0.906345	0.8376	0.861662
203	0.931243	0.856434	0.836835
204	0.921975	0.840119	0.844877
205	0.910398	0.886016	0.822374
206	0.954949	0.861072	0.853973
207	0.928786	0.838707	0.8647
208	0.914996	0.844454	0.853588
209	0.928085	0.845112	0.825691
210	0.926478	0.849265	0.874264
211	0.948426	0.836653	0.871803
212	0.941741	0.828953	0.833342
213	0.92872	0.853374	0.869158
214	0.931021	0.840803	0.850548
215	0.921122	0.842201	0.870793
216	0.943662	0.880593	0.843388
217	0.918813	0.868334	0.863365
218	0.917521	0.848339	0.849389
219	0.924239	0.870019	0.859411
220	0.935881	0.896857	0.853182
221	0.941213	0.896981	0.85557
222	0.93779	0.88352	0.871435
223	0.95928	0.870583	0.859943
224	0.935133	0.894255	0.866637
225	0.917653	0.876703	0.861624
226	0.944492	0.842623	0.856937
227	0.93435	0.877697	0.862801
228	0.957436	0.869779	0.839543
229	0.949801	0.878302	0.865298
230	0.975331	0.906357	0.871491
231	0.988519	0.861031	0.879263
232	0.973214	0.887768	0.858185
233	0.966472	0.889551	0.868426
234	0.972158	0.892303	0.858005
235	0.964594	0.889969	0.871654
236	0.979134	0.867467	0.858408
237	0.986336	0.909335	0.890877
238	0.973837	0.913235	0.896068
239	0.976755	0.903468	0.874541
240	0.980403	0.888912	0.849401
241	0.975377	0.939468	0.867582
242	0.957794	0.88187	0.844152
243	0.975608	0.908926	0.889504
244	0.960355	0.919726	0.872113
245	0.965848	0.882937	0.876611
246	0.952404	0.893202	0.865408
247	0.986176	0.888918	0.855159
248	0.978502	0.910374	0.8802
249	0.981234	0.897354	0.866228
250	0.970071	0.903122	0.899186
251	0.981922	0.888991	0.870551
252	1.00952	0.904136	0.879987
253	0.953556	0.897376	0.847074
254	0.942041	0.947388	0.893149
255	0.944743	0.907773	0.87025
256	0.959731	0.888747	0.893751
257	1.0344	0.910937	0.884054
258	0.980732	0.888986	0.884591
259	0.964193	0.889067	0.902299
260	0.981873	0.897514	0.893578
261	0.930013	0.897025	0.908173
262	0.930746	0.922253	0.892172
263	0.990702	0.91393	0.939068
264	0.97473	0.896432	0.883996
265	0.966491	0.919845	0.894185
266	0.97997	0.891244	0.879477
267	0.968244	0.906159	0.899033
268	0.973028	0.916073	0.902924
269	0.976804	0.869294	0.904393
270	0.942925	0.902281	0.902197
271	0.926329	0.90672	0.9205
272	0.954994	0.937654	0.905509
273	0.993302	0.93018	0.904503
274	0.940878	0.88789	0.869449
275	0.95764	0.916471	0.894559
276	0.946627	0.891042	0.907377
277	0.952979	0.930911	0.92291
278	0.947906	0.909818	0.907073
279	0.93917	0.891117	0.926408
280	0.970488	0.895623	0.917392
281	0.981166	0.907396	0.908188
282	0.95256	0.881255	0.910243
283	0.981766	0.916233	0.903451
284	0.965173	0.905542	0.884508
285	0.971562	0.89658	0.941629
286	0.996286	0.922741	0.928261
287	0.967921	0.913459	0.939264
288	0.943342	0.905181	0.902491
289	0.973323	0.904278	0.922943
290	0.981666	0.906671	0.918982
291	0.997575	0.923055	0.91802
292	1.00149	0.904753	0.933129
293	0.974332	0.96275	0.918115
294	0.963725	0.900817	0.920543
295	0.950157	0.919474	0.888283
296	0.947326	0.927074	0.913707
297	0.953269	0.948871	0.922336
298	0.986669	0.909829	0.919734
299	0.994125	0.893625	0.929698
300	0.992159	0.889126	0.893673
301	0.985373	0.953531	0.913603
302	0.970708	0.950116	0.927285
303	0.951222	0.955703	0.922593
304	0.96552	0.925668	0.930058
305	0.979616	0.966085	0.937872
306	0.996714	0.951841	0.91932
307	0.971259	0.931754	0.926892
308	1.01129	0.933308	0.916172
309	0.970383	0.937587	0.945607
310	0.979205	0.940338	0.948122
311	0.977679	0.979083	0.926055
312	0.977894	0.955459	0.936965
313	0.927818	0.934688	0.93269
314	0.989553	0.972141	0.919648
315	0.955773	0.965055	0.936464
316	0.990296	0.935905	0.898562
317	0.981252	0.948445	0.921027
318	0.989012	0.959594	0.935257
319	0.990545	0.951643	0.954427
320	0.95288	0.983121	0.94579
321	1.02248	0.947603	0.905985
322	0.966158	0.965055	0.93805
323	0.984477	0.94344	0.942124
324	1.01715	0.939219	0.928547
325	0.995257	0.946029	0.923165
326	0.971189	0.979624	0.92691
327	1.01431	0.963836	0.947334
328	0.998881	0.945141	0.944209
329	0.981208	0.935572	0.954359
330	0.959703	0.956708	0.96554
331	0.964272	0.9521	0.936947
332	1.02064	0.937816	0.932104
333	0.997489	0.944308	0.93151
334	0.998797	0.954719	0.973456
335	0.983972	0.952956	0.941659
336	1.00235	0.958865	0.927882
337	0.97612	0.9601	0.952379
338	0.98758	0.929863	0.913228
339	0.990323	0.933205	0.94075
340	0.975619	0.950086	0.948647
341	1.00236	0.966194	0.95589
342	0.975014	0.91315	0.941385
343	1.01158	0.930686	0.932361
344	1.00225	0.928606	0.966273
345	0.989242	0.95483	0.9808
346	0.995134	0.947357	0.95591
347	0.985538	0.954618	0.933184
348	0.977277	0.914379	0.965545
349	1.0057	0.928435	0.930611
350	1.00654	0.954003	0.97867
351	0.998968	0.932899	0.942247
352	0.991577	0.94193	0.941355
353	1.0148	0.924373	0.956104
354	0.956025	0.933637	0.936513
355	0.980552	0.941861	0.971011
356	1.00073	0.982429	0.970602
357	0.985695	0.953225	0.944572
358	0.987138	1.00831	0.930589
359	0.984181	0.941555	0.935942
360	0.997265	0.937141	0.927371
361	1.04135	0.946142	0.950217
362	1.0173	0.936528	0.937584
363	0.960909	0.971778	0.96898
364	0.998956	0.962603	0.928394
365	1.01815	0.971129	0.921694
366	0.974058	0.928673	0.944536
367	1.00825	0.946845	0.955457
368	1.03311	0.951378	0.94615
369	1.01906	0.972298	0.960343
370	0.977487	0.954209	0.941463
371	0.999198	0.973128	0.935118
372	0.998091	0.971698	0.95039
373	0.988808	0.963641	0.936605
374	1.00519	0.975103	0.924115
375	0.992883	0.945481	0.951642
376	0.962113	0.96036	0.95323
377	0.995565	0.940857	0.970184
378	1.02492	0.964264	0.959952
379	1.00083	0.955331	0.938871
380	0.999812	0.971152	0.934393
381	0.984318	0.953614	0.926114
382	0.967624	0.963598	0.94402
383	0.956096	0.959818	0.938678
384	1.005	0.982025	0.955953
385	0.998235	0.95703	0.943347
386	0.980528	0.965263	0.948478
387	1.01151	0.965558	0.930645
388	0.991349	0.990585	0.928734
389	0.994311	0.957131	0.954408
390	1.01226	0.966376	0.956807
391	1.02271	0.972742	0.941549
392	0.993225	0.965048	0.966378
393	1.01518	0.974128	0.963351
394	1.02075	0.982617	0.95858
395	0.999083	0.986054	0.968927
396	1.01539	0.958534	0.945689
397	1.00608	0.970265	0.959592
398	0.992535	0.988996	0.955308
399	1.00485	0.997306	0.960704
400	0.991947	1.00754	0.955525
401	1.01806	0.986893	0.969607
402	1.00763	0.974629	0.950646
403	1.01535	0.931904	0.967472
404	1.01985	0.959158	0.964489
405	0.987408	0.976308	0.966706
406	1.02592	0.960442	0.934059
407	1.023	0.944669	0.962802
408	0.968196	0.946565	0.944896
409	1.00209	0.9316	0.934867
410	1.02696	0.960744	0.932446
411	1.0281	0.957761	0.998399
412	1.03642	0.972163	0.976547
413	1.01343	0.946018	0.949917
414	0.981001	0.962436	0.952131
415	1.03618	0.980497	0.965263
416	1.00381	0.984205	0.956155
417	0.993414	0.934195	0.968136
418	0.980302	0.972004	0.945611
419	1.03495	0.963148	0.979239
420	1.01915	0.989326	0.947281
421	0.976322	0.922196	0.977166
422	0.995794	0.972278	0.95286
423	1.02166	0.980299	0.960303
424	0.994357	0.949874	0.970972
425	0.981938	0.976306	0.959346
426	0.967193	0.958032	0.971633
427	0.965314	0.959422	0.951151
428	0.99984	0.999152	0.951939
429	0.98183	0.98983	0.988576
430	0.978473	0.974289	0.960338
431	0.961921	0.98319	0.949519
432	0.987319	0.971495	0.933111
433	0.993046	0.980223	0.959475
434	0.990838	0.983743	0.925681
435	0.989559	0.967386	0.963019
436	0.960478	0.993388	0.966876
437	1.01471	0.975678	0.954651
438	0.987019	0.96068	0.94851
439	0.989488	1.00296	0.967205
440	0.977375	0.985709	0.961809
441	0.979376	0.981506	0.967892
442	0.961594	0.985292	0.942931
443	0.95614	0.976349	0.945067
444	0.957827	0.982444	0.975053
445	1.00781	0.952414	0.983508
446	0.973283	0.979574	0.983268
447	1.0011	0.976632	0.976707
448	0.990461	0.966553	0.954576
449	0.979902	1.007	0.97494
450	1.00565	0.987697	0.970723
451	0.995871	1.0024	0.986782
452	0.992432	0.989859	0.948181
453	0.989947	0.992976	0.960283
454	0.995823	0.97166	0.954304
455	0.985144	0.962502	0.977098
456	0.976878	0.994443	0.977909
457	0.980446	1.00123	0.926449
458	0.987005	1.00181	0.935453
459	0.984483	0.988781	0.976494
460	1.00658	0.99838	0.963283
461	0.985371	0.964934	0.976569
462	0.966844	1.01725	0.95186
463	0.981115	0.984536	0.96735
464	0.999103	0.977943	0.991102
465	0.988903	0.960948	0.974819
466	0.990399	0.948456	0.952518
467	1.00247	0.953193	0.96041
468	1.01691	0.986366	0.960231
469	1.01332	0.968328	0.93462
470	0.980146	0.937629	0.965605
471	1.04555	0.969545	0.962787
472	1.01003	0.977642	0.953228
473	1.05287	0.942263	0.965316
474	1.01567	0.955334	0.944373
475	1.02039	1.00109	0.990865
476	1.0402	0.963428	0.951966
477	1.00445	0.923663	0.937237
478	0.982004	0.964528	0.95855
479	1.02647	0.950927	0.970119
480	1.0253	0.960298	0.94202
481	1.02054	0.925092	0.967142
482	0.986514	0.973914	0.960925
483	0.994411	0.961911	0.982559
484	1.00672	0.955282	0.962991
485	1.04015	0.959324	0.981884
486	1.0234	0.971407	0.972043
487	1.01917	0.971404	0.985863
488	1.01018	0.972128	0.970171
489	0.982555	0.97303	1.00304
490	0.9957	0.965322	0.982798
491	1.01648	0.992901	0.982145
492	0.995969	1.00072	1.01248
493	0.985939	0.981387	0.981558
494	0.972573	0.974368	0.962341
495	0.965383	0.966076	0.970477
496	0.997173	1.00046	0.970322
497	0.971486	0.971446	0.961722
498	0.989354	0.969858	0.934749
499	0.986949	0.972912	0.970638
500	0.974737	1.01232	0.961441
501	0.980971	0.988257	0.957702
502	0.975429	1.00659	0.985495
503	0.972791	0.98209	0.967008
504	1.00476	1.0191	0.954415
505	0.955491	0.997408	0.976617
506	0.988037	0.987344	0.97187
507	1.0212	1.01186	0.992118
508	0.975633	1.00933	0.962049
509	0.970763	0.973329	0.996862
510	0.983618	1.00909	0.960051
511	1.00838	0.981199	0.968324
512	0.979528	1.0272	0.956064
513	0.97425	1.00013	0.957449
514	0.980995	0.987384	0.937914
515	0.992721	0.97327	0.978317
516	1.02093	1.01651	0.984894
517	1.00867	0.997593	0.99012
518	0.986952	0.961631	0.965507
519	1.00771	0.972902	0.981899
520	0.990161	0.99754	0.991132
521	1.00113	0.970047	0.975942
522	1.00499	0.980924	0.993211
523	1.00529	0.999137	0.96025
524	0.977119	0.974058	0.995618
525	0.982296	0.957181	0.956462
526	1.03872	0.970687	0.990261
527	0.994654	0.97183	1.0075
528	1.01243	0.979532	0.987131
529	1.02163	0.970677	0.965338
530	0.968525	1.00797	0.975763
531	1.01031	0.986684	0.979783
532	0.979137	0.98003	0.968028
533	0.997023	0.991125	0.978988
534	0.990824	0.963197	0.99312
535	0.996446	0.959325	0.992815
536	1.00163	0.980119	0.97598
537	1.01613	0.97919	0.980493
538	1.03732	0.966821	0.998802
539	1.00427	0.995372	0.993852
540	0.976987	0.962352	0.985606
541	0.968836	0.965811	0.966646
542	1.03339	0.945612	0.979649
543	0.979783	0.982112	0.958079
544	0.995311	0.969975	0.960804
545	1.00297	0.962933	0.97538
546	1.00641	0.944316	0.972869
547	0.980206	0.990059	0.982125
548	1.03161	0.962162	0.993886
549	1.02896	0.96026	0.971753
550	0.98095	0.983702	0.971693
551	1.03173	0.967407	0.998195
552	1.03807	0.983964	1.00771
553	1.03318	1.00361	0.991883
554	1.01318	0.971741	0.992236
555	1.02408	0.977888	0.991884
556	1.01442	0.991219	0.980418
557	1.03427	0.975624	0.984813
558	1.01527	0.954732	0.956556
559	1.03961	0.961386	1.0057
560	0.983829	0.992749	1.00148
561	0.97932	0.982941	0.990845
562	1.03485	0.967066	0.974841
563	0.977431	0.999406	0.967937
564	1.00079	0.981063	1.00898
565	1.01394	0.975215	0.991946
566	1.00544	0.994147	1.00709
567	1.00346	0.959043	1.00344
568	1.01525	0.997832	1.00218
569	1.0116	0.973124	0.957412
570	1.00854	0.977755	1.00832
571	1.0207	0.996803	1.00447
572	0.989528	1.01967	0.992573
573	0.968428	0.989866	0.983936
574	0.979186	1.01382	0.9885
575	0.991272	0.968642	0.997257
576	0.97028	0.997649	0.986659
577	0.996007	1.00184	0.988604
578	0.982371	0.999846	1.0069
579	0.992927	1.02678	0.965847
580	0.9605	0.998557	1.00186
581	0.944524	1.00552	0.991462
582	0.993697	0.999537	0.996332
583	0.983605	0.992033	0.99019
584	1.00408	1.00274	0.994848
585	0.983384	1.0042	0.995064
586	0.987371	0.989522	1.00259
587	0.969766	1.00271	1.00189
588	0.970837	1.02376	1.01456
589	0.94815	1.0156	0.994182
590	0.971306	0.995572	0.99046
591	0.981426	0.979669	0.969817
592	1.00271	0.998077	0.974478
593	0.974066	0.961876	1.00686
594	1.00386	0.993853	1.0076
595	0.995552	0.977669	0.991233
596	0.980918	0.982609	0.994876
597	0.979123	0.988513	0.988813
598	0.976646	0.961582	0.977805
599	0.964679	0.963744	0.975789
600	0.991971	0.960941	0.9962
601	1.01208	0.939275	0.980824
602	1.02073	0.980803	0.989692
603	1.00544	0.970465	0.969152
604	1.01549	0.985287	1.00485
605	1.03389	0.958489	0.991146
606	1.03151	0.976728	0.992835
607	0.993128	0.964403	0.972963
608	0.999518	0.955555	0.992782
609	1.02078	0.958749	1.00601
610	1.01563	0.963021	0.991132
611	0.998731	0.968721	0.996853
612	1.0038	0.970594	1.00012
613	0.968471	0.965477	1.01661
614	0.998508	1.00686	1.00235
615	0.990255	1.00278	1.01384
616	1.03085	0.979146	1.01272
617	0.983704	0.978539	0.979251
618	1.00039	0.995374	0.971503
619	1.04775	1.00702	0.982841
620	1.04299	0.964201	1.00039
621	0.974495	0.951487	0.975872
622	1.02155	1.00803	0.970663
623	1.0122	1.01253	0.976544
624	1.01625	1.01569	0.980257
625	1.04209	1.00509	1.01132
626	0.968352	1.01591	0.976027
627	1.02921	0.974435	0.961704
628	1.00589	1.04651	1.00642
629	1.01658	1.01397	1.00088
630	1.00822	1.02231	0.969741
631	1.04263	1.03088	1.00523
632	1.02402	1.00219	0.966756
633	1.00632	0.991672	0.982468
634	1.00245	0.969713	0.958605
635	0.978412	1.02172	0.991119
636	1.00362	1.02679	0.967796
637	1.02362	0.999713	0.971141
638	1.02861	0.986212	0.988485
639	0.995851	1.00106	0.977526
640	1.01623	0.966083	0.985513
641	1.0013	0.968687	0.980297
642	0.999518	0.998633	0.98338
643	1.01121	0.97664	0.977544
644	0.997327	0.991234	0.997732
645	1.01123	0.980994	0.963192
646	0.9829	0.981902	0.992294
647	0.989728	0.969047	0.960832
648	0.963491	0.983269	0.980659
649	1.01159	1.00942	1.01988
650	1.02609	0.990108	0.95757
651	1.02062	0.993091	0.966338
652	0.987543	0.981051	0.986357
653	1.00667	0.976821	0.993263
654	0.998728	1.00601	0.970419
655	0.983701	0.987142	0.992303
656	0.986869	0.993818	0.966534
657	0.953737	1.0324	0.989135
658	1.01425	0.993349	0.967312
659	0.979497	1.0018	0.989286
660	0.9921	0.969067	1.00511
661	1.0412	0.983601	0.985417
662	1.02254	0.952177	0.999303
663	1.01265	1.00652	0.985641
664	0.978431	0.983556	0.975388
665	0.999671	1.03602	0.983523
666	1.02003	0.985865	0.996892
667	1.01199	0.9986	0.970988
668	0.995921	0.994819	1.01055
669	1.00708	0.964095	0.967736
670	0.953389	0.999056	0.950748
671	1.01894	0.954473	0.993973
672	1.01908	1.00736	0.982259
673	1.0202	1.02487	0.982594
674	1.02558	0.960494	0.967373
675	1.02442	0.972214	0.960649
676	1.03748	1.01488	0.982483
677	1.00503	1.00361	0.981592
678	1.03603	0.990899	0.984526
679	1.024	0.973105	0.994526
680	1.00313	0.986802	0.98498
681	1.03576	0.990729	1.00821
682	1.02782	0.980239	0.990476
683	0.990534	0.986305	0.998346
684	1.00263	0.972616	1.00335
685	1.02224	0.96829	0.966787
686	1.01169	1.00684	0.991979
687	0.982645	0.990619	0.975945
688	1.00141	1.00829	0.959404
689	1.01869	0.993814	0.982305
690	1.00108	1.00309	0.977788
691	1.01897	0.992779	0.982405
692	1.03186	0.984328	0.975796
693	1.01299	0.956015	0.943053
694	1.02486	0.975858	0.998548
695	1.00542	0.984398	0.960495
696	0.988432	0.946376	1.00398
697	1.01803	1.01194	0.992998
698	1.02033	0.98863	0.975615
699	1.00411	0.987673	0.970683
700	1.00548	0.98459	0.975524
701	1.01455	0.984616	0.976992
702	0.974899	0.99126	0.992211
703	0.945401	0.959417	0.978542
704	1.03025	0.980058	1.00182
705	1.01656	0.988713	0.990861
706	0.95304	0.958807	0.96494
707	0.999206	0.972309	0.983752
708	0.951441	0.996783	1.00473
709	0.991136	1.02437	1.0231
710	0.979263	0.997482	0.993999
711	0.998081	0.976512	0.97959
712	1.00598	0.993504	0.98683
713	0.971235	0.98158	0.95447
714	0.966792	0.9899	0.985576
715	0.987052	0.99972	0.980429
716	0.950358	0.956606	0.982899
717	0.997866	0.989402	0.976287
718	0.969492	0.980899	0.994121
719	0.988413	0.97042	0.98074
720	0.976053	0.983612	0.998653
721	1.02537	0.998637	0.983564
722	1.00647	0.9947	0.945924
723	1.00477	0.971171	0.953725
724	1.01381	0.990177	0.997295
725	1.01963	0.977122	0.956878
726	0.994507	0.9934	0.988435
727	1.01186	0.973974	0.995747
728	0.994308	1.00841	0.984047
729	1.02017	0.990939	0.982373
730	1.03342	0.991089	0.975957
731	0.977255	0.982223	0.987574
732	0.995617	1.01671	0.983123
733	1.01039	0.978302	0.983206
734	1.0352	0.97739	0.987029
735	0.985441	0.985205	0.972945
736	1.00705	1.00103	0.971507
737	0.998124	1.00721	0.992097
738	1.01629	0.963041	0.994669
739	1.00913	0.982239	0.987931
740	1.07023	0.994829	1.00003
741	0.997369	0.985716	0.991589
742	1.013	0.997438	1.00129
743	1.04103	0.990361	0.999441
744	1.04321	1.00402	0.963381
745	1.00117	0.990429	0.969005
746	1.00844	0.991834	0.965777
747	1.00826	0.999468	0.941776
748	1.01419	0.996332	0.979483
749	1.02062	1.00858	0.977318
750	1.03014	1.00971	0.98989
751	1.03619	1.01515	0.967694
752	0.996087	0.998138	0.965817
753	1.03781	1.00245	0.995313
754	1.01214	0.976974	0.988878
755	1.01371	1.0041	0.983421
756	1.025	0.96097	0.984019
757	1.03314	0.984294	0.97062
758	1.01341	1.00997	0.97407
759	1.01075	1.01046	0.975466
760	1.01692	0.997968	0.991367
761	1.05923	1.0125	0.978265
762	0.988252	1.0123	0.9971
763	1.0291	1.03276	0.973705
764	1.04846	1.00893	0.970882
765	1.02827	0.993978	1.00659
766	1.04966	1.00368	0.98244
767	1.01057	0.982782	1.00985
768	1.02046	1.00601	1.00111
769	1.01714	0.972951	0.988384
770	1.0043	0.958768	0.977861
771	1.03032	0.978214	0.9825
772	1.01176	0.989699	0.958979
773	0.988262	0.988801	0.986317
774	1.03489	1.01048	0.967785
775	1.0446	0.986521	0.978061
776	1.01453	1.00578	1.00148
777	1.01152	0.994428	0.978519
778	0.98927	1.01452	0.996557
779	0.97248	0.99881	0.974542
780	0.981719	0.994372	0.965777
781	1.02628	0.999562	0.990135
782	1.00858	0.97353	0.976089
783	1.00077	0.971864	0.979712
784	1.02206	1.02033	0.981503
785	0.989812	0.985697	0.971328
786	0.994446	0.99039	0.993651
787	0.975872	0.981786	0.953976
788	0.990477	0.992236	0.966292
789	0.967949	0.970177	0.978562
790	0.994001	1.00976	0.996681
791	0.985923	1.005	0.966801
792	0.997236	0.995417	0.952693
793	0.992857	0.981584	0.981645
794	1.01381	0.987407	0.970466
795	0.982135	0.976797	0.9949
796	1.01301	0.978999	0.963897
797	1.00412	1.01506	0.956002
798	0.975508	0.990925	0.99721
799	0.99402	0.968665	0.99054
800	0.98568	1.00091	0.977695
801	1.04056	1.01116	0.964512
802	0.982049	1.01561	0.959626
803	1.004	1.00958	0.950739
804	1.04205	0.997985	0.955747
805	0.976281	0.981191	0.948463
806	0.986932	0.99893	0.980594
807	1.00312	0.995321	0.984261
808	1.01449	0.95059	0.97665
809	1.04379	0.980554	0.963483
810	1.01844	0.992113	0.956845
811	1.00479	1.00126	0.986672
812	1.04961	0.997843	0.990924
813	1.02024	0.994123	0.999843
814	1.03205	0.991964	0.992197
815	0.977258	0.981289	0.984181
816	1.06304	0.99457	0.990714
817	1.03182	0.980177	0.985128
818	1.0261	0.970494	0.969427
819	1.0436	1.01836	0.998742
820	1.06691	0.997406	0.989743
821	1.04268	0.996748	0.969618
822	1.03279	1.00023	0.999457
823	1.02317	0.99356	0.984982
824	1.02683	0.96841	0.967653
825	1.0833	1.02137	1.00604
826	1.03394	0.989927	0.994261
827	1.02145	0.960117	0.983995
828	1.01681	0.986875	0.987005
829	1.04371	0.976508	0.991541
830	1.02701	0.99775	0.984369
831	1.01234	0.971974	0.977687
832	1.02122	0.998607	0.955276
833	1.03023	0.968907	0.96836
834	1.04163	0.979839	0.986656
835	0.99478	0.984495	0.959069
836	1.02538	0.989561	0.980722
837	0.995379	0.959835	0.977584
838	1.01584	1.00729	1.01449
839	0.986595	1.00497	0.990868
840	0.993125	0.992177	0.964719
841	1.02835	0.999331	0.983514
842	1.04181	1.01176	0.979105
843	1.00731	0.990172	0.981523
844	1.01092	1.02841	0.954055
845	1.01791	0.982606	0.974847
846	1.00922	0.949647	0.957717
847	1.00536	1.0018	0.994452
848	1.01724	0.988584	0.979461
849	1.05104	0.986371	0.990957
850	1.00841	0.999844	0.957076
851	0.979737	1.00625	0.98207
852	1.02407	1.01031	0.99545
853	1.02257	1.00774	1.00082
854	1.00979	1.01319	0.98406
855	1.01714	1.03842	0.987656
856	1.00205	0.991341	0.987755
857	0.971902	1.00876	1.0238
858	0.978947	1.00189	0.985322
859	1.02051	1.00481	0.991535
860	1.0055	0.982306	0.966937
861	1.02535	0.976565	0.969011
862	1.00492	0.998323	1.00324
863	1.00091	0.987089	0.979276
864	0.992317	1.04124	0.997936
865	1.00612	1.01307	0.988185
866	1.0232	0.987568	0.973444
867	1.01372	0.974971	0.991934
868	1.01411	1.0283	1.00452
869	1.03338	1.0144	0.986941
870	1.02243	1.0159	1.00537
871	1.03073	1.05291	0.989715
872	0.998653	0.989242	0.984961
873	0.998654	1.0199	0.958475
874	1.01618	1.0104	1.00541
875	0.99571	1.01991	0.980793
876	1.03341	0.991627	0.996629
877	1.02733	1.0254	0.979133
878	1.03059	1.01745	0.982277
879	1.02916	0.974143	0.972409
880	1.04076	1.00446	0.983334
881	1.00521	0.997978	0.995996
882	1.03026	1.00623	1.0001
883	1.01158	1.01111	1.00269
884	1.02836	1.03833	1.00561
885	1.01681	1.00749	1.00438
886	1.02707	1.00549	0.977648
887	1.01683	0.985973	0.959379
888	1.02243	0.987292	1.01442
889	1.03161	1.0184	0.999401
890	1.0533	0.996466	1.01135
891	1.01168	1.01707	1.01365
892	1.05226	0.961843	1.00923
893	1.04823	0.974411	0.987531
894	1.06067	1.0234	1.037
895	1.0088	0.995367	0.980768
896	1.01039	0.981057	0.985304
897	1.0433	1.015	1.01256
898	1.01195	0.998447	0.997084
899	1.04184	1.02519	0.996445
900	1.04127	0.997709	0.958097
901	1.06746	0.975208	0.989694
902	1.03894	0.986015	1.00077
903	0.99667	0.983675	0.986927
904	1.04083	1.00212	0.997155
905	1.01352	1.01112	0.980884
906	0.991185	0.998097	0.990561
907	1.00402	0.990083	0.995504
908	1.00728	0.998352	1.00946
909	1.02768	1.00148	0.994226
910	0.98927	1.02463	1.00519
911	1.03434	0.999779	1.02026
912	1.01622	0.975544	0.980103
913	1.01233	1.00001	0.983665
914	0.98602	0.998947	0.987569
915	0.971595	1.00479	0.984102
916	0.976265	1.00186	0.993052
917	1.0266	0.970588	0.96948
918	0.994971	0.996459	1.00809
919	1.04533	0.968997	0.996457
920	1.00303	1.01244	0.992909
921	0.965353	0.997395	0.982196
922	0.992805	0.987605	1.01831
923	0.980396	1.00928	1.01378
924	1.03794	1.05016	1.01442
925	0.990779	1.01878	0.964379
926	1.03214	1.01229	0.99158
927	0.996313	1.01876	0.99005
928	1.03814	1.00807	0.997095
929	1.01422	1.03917	0.983042
930	1.01219	0.990144	1.00012
931	1.01034	1.00043	1.00277
932	0.983394	1.00252	1.01026
933	1.03113	0.98644	0.990636
934	1.01161	1.03184	1.03001
935	1.00034	0.989386	0.986748
936	0.987779	1.008	0.965187
937	0.996138	1.01687	1.00734
938	0.998479	0.98984	1.01096
939	1.0097	0.979546	1.0078
940	0.97472	1.01394	0.997083
941	1.03233	1.03003	1.01353
942	1.01802	1.02214	0.970837
943	1.01717	1.00766	0.989218
944	0.969433	0.999434	0.998505
945	0.983112	1.00327	1.00761
946	1.02867	1.03348	0.977975
947	1.01955	1.00718	0.98034
948	1.02189	1.01727	1.00664
949	0.996392	0.98315	0.984017
950	1.02604	0.984858	1.01107
951	0.964297	1.01985	0.991815
952	0.993713	1.0292	0.982521
953	0.970002	0.981386	0.962698
954	1.00481	0.973466	0.992931
955	1.01643	1.05163	0.975483
956	1.00022	1.02444	1.0051
957	1.01572	0.99551	0.984203
958	0.99386	1.01415	0.999998
959	0.998982	1.01725	0.995482
960	0.983964	1.00601	0.995021
961	1.00163	0.98489	1.00201
962	1.01489	1.01879	0.993031
963	0.983646	1.02824	0.995543
964	1.00969	0.982914	1.01753
965	1.02569	0.994029	1.01062
966	0.987186	1.00109	1.00913
967	1.02518	1.02943	0.990997
968	1.00853	0.997814	1.02301
969	1.0034	0.98225	1.017
970	1.04584	0.989856	0.993345
971	1.01877	0.960907	0.995654
972	1.03767	1.0115	0.997598
973	1.0303	1.00038	1.00059
974	1.02049	0.994912	0.986642
975	1.0317	0.980152	1.01087
976	1.03726	1.02367	1.01317
977	0.995222	0.977903	0.966227
978	0.998611	0.99645	1.00387
979	1.00569	1.01097	1.02172
980	0.990834	0.984059	1.00521
981	0.996281	0.991053	0.988463
982	1.00976	0.983792	1.0076
983	1.04303	1.01039	1.00467
984	0.99262	1.00379	1.02034
985	0.995602	0.990191	1.02403
986	1.02286	0.980848	1.01977
987	1.0367	0.99041	1.00656
988	1.02641	0.98362	0.979403
989	1.01112	0.985245	0.984919
990	1.04838	0.982689	0.986005
991	1.0095	0.981439	1.00861
992	1.02375	0.999505	0.988087
993	0.97285	1.0119	1.02469
994	1.0017	0.984813	1.00628
995	0.975109	1.00284	1.00369
996	0.995074	0.957962	0.997104
997	1.00366	1.02842	0.993718
998	0.986178	1.00218	0.987783
999	0.983958	1.01911	1.01305
1000	1.03981	1.02179	0.993492
1001	0.967783	0.986209	1.00778
1002	0.972522	0.964572	0.995586
1003	0.980895	1.02946	0.988999
1004	0.928762	0.98591	0.987657
1005	1.01499	1.00041	0.968325
1006	0.991549	0.99883	0.995339
1007	0.98791	0.998037	1.00295
1008	1.03013	1.02022	1.01431
1009	0.972532	0.986874	1.00335
1010	0.98685	1.00534	1.01493
1011	1.01711	1.00118	1.01332
1012	0.965053	1.0094	0.999747
1013	1.01301	1.02027	1.03289
1014	1.00035	0.983255	0.984934
1015	0.960151	0.998362	0.998159
1016	0.986761	1.01403	1.01835
1017	0.996084	0.993879	0.995145
1018	0.993393	0.997161	0.995825
1019	1.00145	1.03868	1.01076
1020	1.0038	1.03727	0.986281
1021	1.01678	1.00885	1.01942
1022	1.01417	0.988613	1.01451
1023	1.04147	0.982887	0.978471
1024	1.01195	0.988493	0.982279
1025	0.993771	0.989886	1.00224
1026	0.993097	1.00562	0.989554
1027	1.00978	0.976361	0.997931
1028	1.02922	0.988594	1.00493
1029	1.01835	1.01249	1.0144
1030	0.987546	1.0154	1.00819
1031	0.970308	0.988033	1.02931
1032	1.02248	1.02561	1.01618
1033	1.01489	0.992952	0.97537
1034	1.02682	0.995576	0.997353
1035	1.00434	1.01832	0.976615
1036	1.0102	1.00857	0.975811
1037	1.02169	0.978221	0.971328
1038	0.979866	0.964702	1.00088
1039	0.987003	0.989172	1.00439
1040	0.998256	1.01575	0.983657
1041	0.987374	0.990834	0.999874
1042	1.025	1.00205	0.994627
1043	1.01681	1.0346	1.00293
1044	1.03723	1.02004	1.00492
1045	1.01093	0.990464	1.01545
1046	1.00533	0.999121	0.99072
1047	0.970292	0.982808	1.0198
1048	0.983718	0.980479	1.01689
1049	1.00045	0.974364	1.00383
1050	0.997723	1.00471	1.01553
1051	1.00339	1.00292	1.01813
1052	1.04128	0.995271	0.99723
1053	1.02099	0.999027	1.0094
1054	0.965001	0.998769	1.00364
1055	0.998321	1.02037	1.0074
1056	0.998747	1.01687	0.998265
1057	1.00179	0.999792	0.9841
1058	1.04429	1.02014	1.00271
1059	1.04713	1.01768	0.994082
1060	0.999097	1.02331	0.999099
1061	1.01093	0.991799	1.01914
1062	1.05133	1.0186	0.991046
1063	1.00757	1.00695	1.00615
1064	1.02702	1.00568	1.01529
1065	1.02586	1.01071	0.984687
1066	0.980311	1.05616	0.999205
1067	1.00572	1.03134	0.982508
1068	0.992419	0.988495	0.984332
1069	1.03633	0.998477	0.993982
1070	1.00406	1.00567	0.972943
1071	0.982465	1.02503	0.982156
1072	0.992505	1.0335	0.963752
1073	0.973264	1.03321	0.983632
1074	0.981285	1.0145	0.974501
1075	1.00662	1.0314	0.977136
1076	1.00906	1.03632	0.983674
1077	0.992533	1.00197	0.965826
1078	0.996198	1.01951	0.980682
1079	0.994947	1.01326	0.967062
1080	1.00781	0.981919	1.00468
1081	0.952991	1.01986	0.958271
1082	1.01168	1.01721	0.988762
1083	1.00521	0.999574	0.987628
1084	0.981493	0.987979	0.981191
1085	1.02682	1.01338	0.977076
1086	1.04409	1.02232	0.987467
1087	0.991665	1.03783	1.00243
1088	0.986161	1.02452	0.99013
1089	0.972037	1.02322	0.969234
1090	0.965451	1.00877	0.982458
1091	0.97917	1.00091	0.980924
1092	0.993929	1.00406	0.96299
1093	1.01869	0.996565	0.959322
1094	0.978771	1.00725	0.987978
1095	0.984534	1.00535	1.00225
1096	0.97833	1.01422	0.992747
1097	0.929905	1.02602	1.00748
1098	0.962498	1.01259	0.989331
1099	0.960361	0.993781	0.976547
1100	0.953363	1.03393	1.01661
1101	0.99831	1.03405	1.02075
1102	0.998733	1.01711	1.00047
1103	1.00252	0.994746	1.00747
1104	1.02425	1.02675	0.987193
1105	1.0026	0.989132	0.992099
1106	1.00513	1.00974	0.98648
1107	0.982462	0.978199	0.999154
