# Supplementary material for: The photosystem I supercomplex from a primordial green alga Ostreococcus tauri harbors three light-harvesting complex trimers
Source: eLife journal article supplement (doi:10.7554/elife.84488), 2023-03-23
Supplement: supp [file Fig.11c_qdata.xlsx]

## Sheet: Sheet1
time/ms	set1_LL_22uE	set1_HL-tre_22uE	set1_re-LL_22uE
-100	-0.0616715	-0.0340803	-0.0289563
-99	0.0161048	0.0271865	0.00293386
-98	0.00108152	0.0320811	-0.0196609
-97	-0.035486	-0.00858555	0.0428281
-96	0.00491223	-0.0034984	0.0383282
-95	-0.0326964	0.0113251	0.0203216
-94	-0.0130468	-0.0174385	0.0178936
-93	-0.0191447	-0.00512527	0.0559034
-92	-0.0236076	0.00910802	0.0587506
-91	-0.0222705	0.0199425	0.0211822
-90	-0.0358965	-0.0108365	0.0112201
-89	-0.0199634	0.0115578	-0.0129307
-88	-0.0179715	-0.000172146	0.0160214
-87	-0.0165581	0.0223001	-0.00296943
-86	-0.0221138	0.03962	0.00080694
-85	0.00428655	0.0361426	0.00422674
-84	-0.0131384	0.0308407	0.00936417
-83	0.0155886	0.0101842	0.00153273
-82	0.00122621	-0.00729886	-0.00696304
-81	-0.0119572	0.0169392	-0.0171293
-80	0.0283642	-0.0111134	0.0362377
-79	0.0135942	-0.00683157	0.0122664
-78	-0.0261576	-0.00651589	0.0101158
-77	-0.00320338	0.0244677	0.0105006
-76	0.0194926	0.0118846	-0.0307403
-75	-0.0109821	-0.00465063	-0.0385453
-74	0.0137825	-0.00703526	-0.00923689
-73	0.0107977	0.0103391	-0.00572542
-72	-0.0187439	-0.0114888	-0.00238223
-71	-0.0369635	0.0102516	-0.0240713
-70	0.0230339	0.00187752	-0.0180862
-69	-0.0349831	-0.0148521	-0.0108568
-68	0.00090298	0.0443323	-0.0304531
-67	0.00624874	0.03771	-0.0148991
-66	-0.00756327	-0.0106635	-0.025132
-65	0.0279706	0.0101728	-0.016368
-64	0.0276041	-0.0224626	-0.0253317
-63	-0.0397071	0.0151973	0.0198763
-62	-0.0281329	0.00599773	-0.0423002
-61	-0.0115643	0.0228661	-0.0108943
-60	-0.0220445	-0.0168999	0.0161263
-59	-0.0433744	-0.00284965	0.0108496
-58	-0.0368951	-0.0155782	-1.85037e-05
-57	-0.0272398	-0.0364515	-0.0101986
-56	-0.0176091	-0.0052117	0.0103418
-55	-0.0211788	-0.0199294	0.0114008
-54	-0.0167177	-0.0215813	-0.0189039
-53	0.00791218	0.0288653	-0.0208735
-52	-0.0408289	-0.028215	0.0570427
-51	-0.0250427	-0.0367837	0.00916273
-50	-0.0582323	0.00813159	0.0173987
-49	-0.0217792	-0.00645881	0.0248651
-48	-0.0522524	-0.00870728	0.0322813
-47	-0.0139398	-0.00343959	0.039636
-46	-0.0183401	-0.0156708	-0.0139481
-45	-0.030188	0.0159703	-0.012696
-44	-0.0485975	-0.0209015	0.00972721
-43	-0.0363966	-0.00268425	0.0392361
-42	-0.0355161	-0.0179976	0.0639443
-41	-0.0220484	-0.00269997	0.010456
-40	-0.0383875	-0.00418403	0.00471467
-39	-0.0249254	-0.0328502	-0.0138051
-38	-0.0472178	0.00391752	0.0141895
-37	-0.0387708	-0.0111727	0.0152637
-36	-0.0142927	-0.025172	0.0152274
-35	-0.0186567	-0.0164251	-0.0283933
-34	-0.025443	-0.00330341	-0.00109078
-33	-0.0467497	0.0104777	-0.0164799
-32	-0.0220624	-0.0168973	0.0182619
-31	-0.00272829	0.0052942	0.0117428
-30	-0.00624334	0.004247	0.00788917
-29	-0.0197244	-0.0227518	0.0334074
-28	0.000273182	-0.00385612	-0.012014
-27	0.0130947	0.0243006	-0.00974871
-26	-0.0063316	-0.0218172	-0.0359874
-25	0.0128447	0.015902	-0.0243921
-24	-0.0225406	0.000171576	-0.0275288
-23	0.00325893	-0.0365006	-0.0327847
-22	-0.0113595	0.029945	0.00664462
-21	0.0196014	0.0320532	0.0156169
-20	-0.0615272	-0.00130697	0.0338313
-19	-0.000722134	0.0330099	0.00622454
-18	-0.00798425	-0.00993325	0.0129047
-17	0.00533031	0.0104724	-0.0134386
-16	0.00181425	0.0439829	-0.000380076
-15	0.0153008	0.0290464	-0.00264031
-14	-0.0452604	-0.0176512	0.0168945
-13	-0.00967179	-0.0418528	-0.0193875
-12	0.00970296	-0.01932	0.0200968
-11	-0.021062	0.0277005	0.00400056
-10	-0.0189346	-0.0252528	0.0134006
-9	-0.0150899	-0.000387217	-0.0185582
-8	0.0046231	-0.00645934	-0.0165843
-7	0.000480102	-0.0162522	-0.0253909
-6	-0.000586497	-0.0270634	0.0255977
-5	0.00077068	-0.0382826	-0.00199437
-4	-0.00777749	0.00812443	0.010082
-3	0.00184581	0.0235157	-0.012462
-2	-0.0303009	0.0170589	0.0116032
-1	0.0354619	-0.0104165	-0.00722892
0	0.0058125	-0.0045131	0.0193145
1	0.00398421	-0.00639771	0.00819914
2	-0.0154446	0.0262073	-0.00648355
3	-0.0288824	0.0500027	0.00307969
4	-0.028701	0.00313423	0.038184
5	0.00366908	0.0497855	0.100934
6	0.0185526	0.0303577	0.0193316
7	0.0230323	0.0581433	0.0619609
8	0.028582	0.0746103	0.0877623
9	0.0249582	0.0300294	0.0899826
10	0.0405826	0.0405568	0.0609692
11	0.0470846	0.0731501	0.0602426
12	0.0730153	0.0340203	0.128321
13	0.0945204	0.0208676	0.0841561
14	0.13084	0.0821469	0.104218
15	0.11727	0.0803347	0.125862
16	0.117335	0.125545	0.174539
17	0.13824	0.0880671	0.178256
18	0.138982	0.142918	0.151659
19	0.148962	0.158237	0.196144
20	0.155942	0.159229	0.184065
21	0.149906	0.155501	0.207237
22	0.167344	0.175326	0.210067
23	0.199967	0.172338	0.236805
24	0.188832	0.198115	0.23721
25	0.215594	0.141677	0.245142
26	0.239519	0.230065	0.254534
27	0.210281	0.236593	0.252561
28	0.226343	0.250484	0.295431
29	0.213512	0.249394	0.306232
30	0.248147	0.206819	0.304397
31	0.241005	0.268986	0.270478
32	0.306321	0.256428	0.331869
33	0.296824	0.254342	0.300614
34	0.288942	0.258341	0.3354
35	0.266266	0.316611	0.384192
36	0.299259	0.26498	0.316671
37	0.249544	0.325714	0.343001
38	0.31731	0.288643	0.379695
39	0.348436	0.32094	0.36621
40	0.339442	0.340905	0.374689
41	0.343965	0.312511	0.336771
42	0.385349	0.350728	0.381451
43	0.326056	0.350577	0.369551
44	0.34943	0.293039	0.398008
45	0.391268	0.297048	0.398825
46	0.384467	0.345939	0.454904
47	0.371763	0.311209	0.405893
48	0.41222	0.35583	0.413643
49	0.369979	0.360901	0.417266
50	0.410248	0.367742	0.439714
51	0.426404	0.378736	0.427711
52	0.413281	0.396911	0.484483
53	0.43434	0.40329	0.426682
54	0.455659	0.398391	0.461399
55	0.408725	0.377088	0.439508
56	0.447445	0.426274	0.497897
57	0.45823	0.39365	0.479013
58	0.4773	0.433541	0.506636
59	0.444021	0.43255	0.49525
60	0.486972	0.431177	0.492123
61	0.486695	0.436571	0.519952
62	0.459439	0.420685	0.494907
63	0.486658	0.443672	0.507018
64	0.502547	0.457299	0.524531
65	0.498194	0.432334	0.507685
66	0.493465	0.495012	0.525169
67	0.528674	0.516417	0.499432
68	0.518465	0.448157	0.500421
69	0.544176	0.487473	0.507928
70	0.528451	0.450848	0.512898
71	0.53264	0.490536	0.580896
72	0.570888	0.486914	0.553646
73	0.552805	0.500223	0.557156
74	0.553363	0.480988	0.571306
75	0.562778	0.524642	0.555426
76	0.547966	0.524017	0.546502
77	0.5988	0.468427	0.553763
78	0.592458	0.505283	0.55865
79	0.573553	0.564455	0.557592
80	0.573661	0.541881	0.610261
81	0.576678	0.555628	0.599911
82	0.603395	0.519353	0.577915
83	0.5803	0.519263	0.566504
84	0.609731	0.518037	0.591983
85	0.599423	0.54573	0.649444
86	0.611662	0.576377	0.612643
87	0.599016	0.560173	0.621508
88	0.617876	0.569665	0.58955
89	0.601097	0.537241	0.610953
90	0.64274	0.583889	0.662337
91	0.617274	0.578828	0.641869
92	0.667742	0.570116	0.619585
93	0.638249	0.573494	0.612789
94	0.621564	0.562672	0.637339
95	0.61004	0.593223	0.670028
96	0.618537	0.59985	0.670895
97	0.624487	0.574849	0.68136
98	0.641635	0.60392	0.676486
99	0.624951	0.556639	0.679841
100	0.686228	0.56044	0.65657
101	0.628422	0.594985	0.666385
102	0.655754	0.565532	0.684223
103	0.677976	0.620207	0.65286
104	0.655354	0.604557	0.641941
105	0.67615	0.631105	0.659952
106	0.651703	0.613245	0.653838
107	0.667069	0.643715	0.68155
108	0.703539	0.619112	0.715507
109	0.688181	0.648234	0.710175
110	0.713851	0.622299	0.699869
111	0.659984	0.649366	0.691831
112	0.668649	0.64048	0.665999
113	0.721667	0.6342	0.706244
114	0.698979	0.619695	0.675058
115	0.711136	0.669359	0.711367
116	0.695429	0.635353	0.721002
117	0.685919	0.6808	0.725611
118	0.731575	0.653379	0.69195
119	0.709421	0.644315	0.752344
120	0.704128	0.64585	0.736524
121	0.738411	0.645945	0.752975
122	0.692397	0.685967	0.678494
123	0.707989	0.6464	0.710273
124	0.728763	0.685358	0.699802
125	0.71406	0.661949	0.717749
126	0.712984	0.711025	0.752645
127	0.722611	0.664897	0.723304
128	0.762059	0.681794	0.72556
129	0.756119	0.704244	0.728739
130	0.745168	0.680392	0.717284
131	0.720575	0.68198	0.751417
132	0.74298	0.667565	0.714661
133	0.750939	0.705325	0.760601
134	0.755502	0.681555	0.741246
135	0.742293	0.711301	0.75978
136	0.731302	0.715773	0.721018
137	0.72474	0.699654	0.731209
138	0.740784	0.730476	0.736266
139	0.725736	0.699529	0.749008
140	0.727348	0.718156	0.791207
141	0.768751	0.741056	0.747484
142	0.752192	0.715937	0.765911
143	0.769246	0.722989	0.760965
144	0.772684	0.683957	0.774861
145	0.766045	0.678267	0.792765
146	0.759001	0.727462	0.7485
147	0.757848	0.692302	0.77085
148	0.767601	0.718048	0.766105
149	0.822183	0.744673	0.764163
150	0.779271	0.718966	0.803239
151	0.83697	0.713762	0.834517
152	0.790648	0.720175	0.782886
153	0.790545	0.723701	0.803338
154	0.744796	0.717402	0.745406
155	0.745324	0.75912	0.784808
156	0.802824	0.762883	0.815365
157	0.788423	0.741308	0.800179
158	0.771158	0.751959	0.806056
159	0.782097	0.747935	0.830439
160	0.804543	0.742421	0.815274
161	0.822828	0.738344	0.799695
162	0.817096	0.777509	0.799877
163	0.776998	0.791753	0.778822
164	0.849838	0.76349	0.815747
165	0.825152	0.753273	0.826097
166	0.831459	0.764541	0.847153
167	0.806666	0.757085	0.816034
168	0.823773	0.737367	0.835606
169	0.795834	0.778034	0.860423
170	0.815396	0.782585	0.828881
171	0.853958	0.766455	0.817189
172	0.834504	0.761986	0.815827
173	0.838957	0.752463	0.833633
174	0.862044	0.734509	0.853919
175	0.804864	0.8282	0.849962
176	0.844464	0.782658	0.814862
177	0.847871	0.794091	0.838506
178	0.841331	0.743407	0.831963
179	0.803767	0.787526	0.839517
180	0.833811	0.837117	0.843025
181	0.858184	0.824505	0.85217
182	0.825841	0.797912	0.823622
183	0.836068	0.801401	0.843782
184	0.767983	0.811279	0.831326
185	0.876815	0.790121	0.839331
186	0.84491	0.795366	0.811535
187	0.859649	0.801877	0.830803
188	0.874728	0.800993	0.837552
189	0.882013	0.781224	0.84951
190	0.85471	0.82758	0.831551
191	0.845394	0.815164	0.874836
192	0.812477	0.813947	0.833002
193	0.837344	0.749874	0.884052
194	0.874867	0.825236	0.848713
195	0.823593	0.773549	0.861694
196	0.886992	0.838726	0.871673
197	0.852116	0.783144	0.880065
198	0.866423	0.781447	0.823994
199	0.844469	0.81945	0.835835
200	0.858208	0.798352	0.885289
201	0.827607	0.784993	0.90981
202	0.844809	0.82691	0.853273
203	0.8448	0.776664	0.861109
204	0.843877	0.811871	0.874563
205	0.851883	0.834902	0.857863
206	0.839953	0.832366	0.916517
207	0.839207	0.859545	0.864438
208	0.876657	0.807	0.867111
209	0.89263	0.817031	0.854491
210	0.915242	0.838955	0.875416
211	0.885591	0.790899	0.915106
212	0.834154	0.792094	0.837888
213	0.833143	0.831897	0.897617
214	0.90764	0.826514	0.870493
215	0.909626	0.851356	0.895116
216	0.867332	0.813582	0.870925
217	0.83024	0.806762	0.894508
218	0.900587	0.838208	0.888178
219	0.862096	0.868046	0.859502
220	0.889879	0.821724	0.868124
221	0.868399	0.813832	0.905529
222	0.874536	0.844319	0.88547
223	0.900999	0.858239	0.900488
224	0.900063	0.870163	0.861726
225	0.915136	0.805772	0.890533
226	0.877181	0.833374	0.896429
227	0.901567	0.831046	0.91464
228	0.87488	0.894842	0.9101
229	0.929221	0.796322	0.906163
230	0.897149	0.857156	0.899375
231	0.901955	0.868698	0.90214
232	0.910011	0.872415	0.892179
233	0.869898	0.861444	0.880392
234	0.887519	0.885443	0.882096
235	0.857801	0.847347	0.907232
236	0.921916	0.891505	0.897448
237	0.929707	0.832761	0.928297
238	0.905442	0.882325	0.889516
239	0.884377	0.832034	0.893762
240	0.8795	0.878692	0.917949
241	0.88581	0.874025	0.912854
242	0.879013	0.888419	0.873884
243	0.904559	0.870075	0.904675
244	0.87453	0.886385	0.934468
245	0.916868	0.873866	0.941615
246	0.904884	0.844903	0.932998
247	0.905108	0.889527	0.888892
248	0.925591	0.899296	0.913885
249	0.918826	0.909398	0.908721
250	0.893153	0.884449	0.917484
251	0.906848	0.89499	0.914568
252	0.884011	0.842237	0.910896
253	0.884064	0.857289	0.930384
254	0.875065	0.888689	0.889745
255	0.873138	0.854002	0.926699
256	0.86126	0.890434	0.931851
257	0.911227	0.894362	0.93047
258	0.908657	0.845035	0.902673
259	0.893248	0.872624	0.939282
260	0.903301	0.874335	0.905152
261	0.923897	0.860758	0.931352
262	0.903698	0.846696	0.921206
263	0.897403	0.88478	0.940943
264	0.894131	0.868443	0.898037
265	0.895962	0.902214	0.924341
266	0.923354	0.876667	0.951451
267	0.910336	0.884047	0.901354
268	0.904935	0.917963	0.883568
269	0.936399	0.904306	0.916671
270	0.896289	0.924334	0.918924
271	0.896836	0.908354	0.88989
272	0.90388	0.914905	0.896929
273	0.922275	0.895259	0.929073
274	0.954898	0.890085	0.935468
275	0.936278	0.902104	0.907558
276	0.93521	0.894666	0.877921
277	0.914912	0.927797	0.912214
278	0.866383	0.888986	0.89353
279	0.898064	0.909267	0.956553
280	0.901164	0.905736	0.918611
281	0.914638	0.890706	0.930865
282	0.947805	0.876093	0.933182
283	0.940693	0.893068	0.901947
284	0.958078	0.873402	0.898141
285	0.944156	0.889833	0.894853
286	0.934057	0.897401	0.922895
287	0.902572	0.912461	0.934021
288	0.954421	0.880075	0.951212
289	0.891813	0.917886	0.928234
290	0.904966	0.856619	0.934002
291	0.934856	0.889772	0.902515
292	0.93888	0.920521	0.910641
293	0.90412	0.889928	0.933494
294	0.95164	0.91649	0.893344
295	0.943327	0.96407	0.917323
296	0.935926	0.906151	0.922916
297	0.905953	0.87494	0.937653
298	0.909293	0.881699	0.943124
299	0.946774	0.913483	0.932154
300	0.92	0.876769	0.921433
301	0.905192	0.898668	0.937839
302	0.884577	0.920382	0.918038
303	0.921924	0.888943	0.940711
304	0.919613	0.941675	0.957597
305	0.908375	0.90994	0.932323
306	0.895749	0.932717	0.956172
307	0.931647	0.928725	0.955227
308	0.930099	0.899938	0.910844
309	0.927296	0.906661	0.929259
310	0.908888	0.87432	0.950017
311	0.957201	0.915095	0.929748
312	0.940908	0.902154	0.953091
313	0.910119	0.921404	0.9188
314	0.938859	0.937992	0.906074
315	0.954441	0.888851	0.942596
316	0.941501	0.887178	0.9472
317	0.904874	0.927489	0.92053
318	0.945311	0.943266	0.926695
319	0.909803	0.90645	0.947687
320	0.949059	0.919987	0.930604
321	0.898655	0.89964	0.956063
322	0.946019	0.900605	0.967488
323	0.923654	0.925476	0.964053
324	0.941668	0.904674	0.971864
325	0.93262	0.946727	0.987236
326	0.914792	0.923338	0.944519
327	0.945267	0.905518	0.914894
328	0.983549	0.894823	0.891407
329	0.927561	0.897659	0.914116
330	0.911686	0.980514	0.963936
331	0.925547	0.957472	0.977269
332	0.981947	0.919146	0.956717
333	0.977797	0.949794	0.979477
334	0.971794	0.960431	0.936819
335	0.968208	0.907269	0.926805
336	0.971285	0.894753	0.990722
337	0.99987	0.934578	0.938025
338	0.935374	0.92458	0.955616
339	0.953583	0.955732	0.938108
340	0.944561	0.919177	0.940746
341	0.976833	0.939261	0.910615
342	0.97667	0.945109	0.972133
343	0.943753	0.944846	0.99362
344	0.988367	0.907777	0.934892
345	1.00328	0.928669	0.959158
346	0.964046	0.940018	0.964953
347	0.971851	0.893459	0.974969
348	0.982146	0.933928	0.930774
349	0.968656	0.935398	0.938309
350	0.96839	0.924633	0.933516
351	0.964913	0.954428	0.939613
352	0.945403	0.968452	0.949926
353	0.976168	0.891749	0.96432
354	0.964052	0.917744	0.963011
355	0.979583	0.937766	0.983643
356	0.973828	0.927469	1.00094
357	0.998659	0.9027	0.953118
358	0.96911	0.905914	0.942886
359	0.936325	0.944118	0.952725
360	0.950943	0.954106	0.974388
361	0.953552	0.966413	0.946806
362	0.997938	0.926617	0.955089
363	0.992102	0.928821	0.987687
364	0.926962	0.936522	0.957282
365	0.984213	0.938986	0.935695
366	0.930306	0.943401	0.988466
367	0.934845	0.928512	0.952453
368	0.96401	0.921051	0.958047
369	0.943707	0.913935	0.964562
370	0.913732	0.926764	0.969238
371	0.949836	0.967821	0.930581
372	0.930436	0.955002	0.94502
373	0.915857	0.938575	0.94191
374	0.973135	0.956713	0.963934
375	0.921573	0.94322	0.94935
376	0.974395	0.925542	0.974001
377	0.942875	0.951088	0.935388
378	0.939338	0.997426	0.937698
379	0.945258	0.923756	1.01969
380	0.910928	0.957664	0.984287
381	0.972098	0.952662	0.969771
382	0.936678	0.948622	0.955027
383	0.946228	0.939061	0.974252
384	0.961198	0.934085	0.954052
385	0.972689	0.947852	0.975948
386	0.976967	0.918647	0.992726
387	0.944176	0.964171	0.956198
388	0.989977	0.918991	0.920435
389	0.922521	0.938808	0.945239
390	0.972187	0.955006	0.98278
391	0.898141	0.980381	0.980318
392	0.941275	0.985982	0.997606
393	0.964976	0.98578	1.00875
394	0.944874	0.945057	0.964497
395	0.948901	0.970657	0.975667
396	0.935297	0.902301	0.959696
397	0.971211	0.966192	0.95518
398	0.952304	0.971674	0.938018
399	0.929512	0.929933	0.954769
400	0.917328	0.927939	0.944005
401	0.934958	0.946744	0.95614
402	0.952811	0.976395	0.973264
403	0.993705	0.952924	0.952343
404	0.916854	0.924402	0.986348
405	0.970528	0.964033	0.960205
406	1.00196	0.950187	0.964343
407	0.993052	0.917973	0.990606
408	0.930829	0.941941	0.971448
409	0.962458	0.926543	0.983276
410	0.960422	0.961491	0.940479
411	0.995181	0.942947	0.997171
412	0.989349	0.959092	0.925294
413	1.00145	0.95144	1.00539
414	0.961488	0.921549	0.979462
415	0.995984	0.968736	0.94901
416	0.996098	0.94412	0.987322
417	0.983913	0.933711	0.950224
418	1.0395	0.960036	0.978203
419	0.987705	0.904092	0.947611
420	1.01127	0.968887	0.924099
421	0.966157	0.933881	0.971974
422	0.985604	0.935503	0.965426
423	0.955543	0.955007	0.970524
424	0.978332	0.914742	0.968885
425	0.972322	0.96839	0.954364
426	0.933944	0.964077	0.969536
427	0.962635	0.959692	0.998464
428	0.99325	0.970947	1.01746
429	0.952143	0.963254	0.963172
430	0.940499	0.944203	0.982177
431	0.985784	0.904683	0.977868
432	0.940048	0.928715	0.943486
433	0.95781	0.970289	0.937719
434	0.949694	0.939042	0.957007
435	0.972049	0.924185	0.964947
436	0.956249	0.974159	0.955098
437	0.979033	0.951572	0.946668
438	0.958101	0.957114	1.00194
439	0.968196	0.967561	0.963615
440	0.952749	0.937841	0.986773
441	0.943667	0.972457	0.954887
442	0.996028	0.916897	0.972112
443	0.969796	0.917879	0.936334
444	0.97505	0.949447	0.988459
445	0.955847	0.963262	0.970422
446	0.96092	0.948668	0.979464
447	0.973048	0.97784	0.97547
448	0.954595	0.977189	0.964555
449	1.01228	0.983788	0.955025
450	1.03711	0.995279	0.956068
451	0.982181	0.987537	0.982612
452	0.964656	0.968126	0.967086
453	0.934564	0.941156	0.974602
454	0.979167	0.982438	0.981686
455	0.947455	0.977834	0.963965
456	0.996348	0.9638	0.942411
457	0.978197	1.00755	0.977073
458	0.984442	0.965438	0.975735
459	1.00833	0.971262	0.960631
460	0.983813	0.983912	0.949656
461	0.970158	0.97577	0.967253
462	0.960346	0.954606	0.937766
463	0.969403	0.960485	0.98538
464	0.971037	1.01093	0.975093
465	0.982978	0.957262	0.967767
466	0.969566	0.98097	0.950818
467	1.00437	0.936358	0.961851
468	1.00327	0.990428	0.966077
469	1.02077	0.980925	0.965924
470	0.979926	0.994017	0.927152
471	0.974838	0.971691	0.989359
472	0.946486	0.985752	0.956127
473	1.00701	0.946701	0.997685
474	0.979316	0.945914	0.98095
475	0.981841	0.932708	0.991104
476	0.993584	0.994759	0.991957
477	0.995659	0.990253	0.973187
478	0.976719	0.953195	0.970293
479	1.02506	0.993325	0.937948
480	1.0076	0.930353	0.991393
481	1.01084	0.954696	0.992155
482	0.952202	0.981593	0.96497
483	0.981764	0.95281	0.982183
484	1.01354	0.981324	0.967172
485	1.01101	0.984806	0.983273
486	0.994106	0.976523	0.931761
487	1.01067	0.970925	0.990679
488	0.968766	0.968832	0.963916
489	0.981361	1.00434	0.980341
490	0.990244	0.96817	0.951317
491	0.984282	0.955056	0.960117
492	0.984526	1.00259	0.954809
493	0.963596	0.969357	0.943488
494	1.0091	0.987012	0.967604
495	1.00659	0.994271	1.0042
496	0.979008	0.97743	0.985164
497	0.986203	0.992426	0.986169
498	0.938154	0.98036	1.00895
499	0.965383	0.922636	1.00687
500	0.913945	1.00242	0.997784
501	0.993184	1.00114	1.00306
502	0.935939	0.955755	0.95014
503	0.988742	0.979534	1.00613
504	0.953657	0.995639	0.994079
505	0.984385	0.998707	0.986565
506	0.965349	0.97743	0.971579
507	0.970248	0.969687	0.98663
508	0.954649	0.998687	1.02528
509	0.970333	0.971383	0.98649
510	0.958572	1.00417	1.00527
511	0.994937	0.933778	1.01246
512	0.994429	0.968342	0.938908
513	0.981308	0.941137	0.987163
514	0.986412	0.992817	0.992545
515	0.951332	1.0042	0.938137
516	0.965037	1.02228	0.989576
517	0.961578	1.00547	0.982603
518	0.989265	0.969185	0.98349
519	0.974456	0.958332	0.97556
520	0.983975	0.952809	0.981811
521	0.99304	0.987219	0.980042
522	0.965787	1.00074	1.00643
523	0.979863	0.981528	0.968797
524	0.99376	0.997857	0.976957
525	0.991412	0.996836	1.0499
526	0.983529	0.983254	1.01036
527	0.988032	1.00582	0.983824
528	0.944692	0.972842	0.962497
529	0.997866	0.983811	0.965776
530	0.964853	1.0072	0.961843
531	0.991853	0.978867	0.977416
532	1.00056	0.970929	0.919593
533	0.982226	0.962755	0.997857
534	0.984518	0.997399	1.03491
535	0.967851	0.991244	0.982383
536	1.01507	0.964448	0.989026
537	0.962019	0.938309	0.96157
538	0.931747	0.980913	0.976222
539	1.0318	0.999006	0.981724
540	1.02209	0.997308	0.974518
541	0.963183	1.00419	0.984523
542	0.992276	0.955073	0.999518
543	0.95469	0.975728	0.943856
544	0.974263	1.01345	0.94934
545	1.00977	0.99487	0.992169
546	1.0048	0.969992	1.01825
547	0.952353	0.981312	0.978553
548	0.957731	0.99977	0.954971
549	0.950785	0.942255	1.01382
550	0.990117	0.935996	0.98805
551	0.976447	0.978125	0.980576
552	1.03126	0.999885	0.981597
553	1.00161	0.975457	0.97863
554	0.94392	0.977836	0.949426
555	1.02148	0.954225	0.99545
556	0.9872	0.894866	1.00932
557	0.996303	0.976363	0.950957
558	1.0079	0.961617	0.990974
559	0.981408	0.974534	0.976933
560	0.97773	0.961649	0.963994
561	1.01906	1.00778	0.966846
562	0.992933	0.968689	0.956127
563	0.982617	0.959993	0.943455
564	0.965138	0.97356	0.960463
565	0.964313	0.95411	0.952606
566	0.965551	0.960292	0.986809
567	0.97691	0.981001	1.00181
568	1.03154	0.986187	0.990828
569	0.976093	0.983057	1.03252
570	1.00233	0.988628	0.975426
571	0.999382	1.00126	0.988389
572	0.997098	0.985298	0.987576
573	0.998941	1.0134	0.956033
574	0.987304	1.00779	1.03674
575	0.979051	0.99278	0.973704
576	0.992306	1.02431	1.02422
577	0.965189	1.00272	1.00865
578	0.963717	0.992352	0.948758
579	0.995233	1.00598	0.940151
580	0.986758	0.956925	0.957318
581	0.983045	0.961883	0.957801
582	0.993625	1.0189	1.0195
583	0.975754	1.00289	1.02697
584	1.01675	0.965237	1.01158
585	1.01585	0.987368	1.01806
586	1.01124	0.995295	0.968575
587	0.992823	0.964139	0.939539
588	1.00217	1.01373	0.999668
589	0.991926	0.965643	0.983993
590	0.971469	1.03338	1.01096
591	0.999652	0.984459	1.00185
592	0.971984	0.995995	0.971546
593	1.00258	0.960168	0.984731
594	1.00554	0.994478	0.989249
595	0.992054	0.973311	0.988922
596	1.01351	0.996605	0.9638
597	1.02532	0.973054	0.976379
598	1.00622	0.974423	0.964202
599	0.951197	0.990413	1.01348
600	1.00156	0.989244	0.973039
601	1.03587	0.975509	0.944795
602	1.02331	1.01095	0.995731
603	0.979444	1.02837	0.994371
604	1.01089	1.01605	0.985075
605	0.98129	0.963157	0.983699
606	1.00053	1.03075	0.98998
607	0.985341	0.990084	0.957441
608	0.9906	1.00108	0.988284
609	0.980069	1.01426	0.972258
610	0.99103	0.995494	0.987785
611	0.963561	0.997615	0.954103
612	0.958025	1.00571	0.974855
613	0.998307	0.960199	0.995197
614	0.973913	0.977382	0.99832
615	0.997629	0.97411	0.986257
616	0.98308	0.990286	0.953567
617	0.989428	1.00177	0.959978
618	1.00352	0.962369	0.970096
619	1.01015	0.985013	0.988014
620	0.989655	1.00977	1.01061
621	1.011	1.00287	1.04026
622	1.00714	0.973709	0.989981
623	1.00382	0.999591	0.987572
624	0.947219	0.959845	0.957335
625	0.970346	1.00444	0.999846
626	0.994379	0.984739	1.00584
627	0.986377	1.01462	1.01212
628	0.931184	0.959574	1.01478
629	1.02791	0.974766	1.0062
630	1.02351	0.983591	0.979942
631	1.00458	0.988582	0.976901
632	0.977512	0.975262	0.982574
633	0.941365	0.967236	0.984707
634	0.98783	1.0153	0.984827
635	0.96647	0.946106	0.93814
636	0.982673	1.00464	1.00856
637	0.967387	0.998331	0.968722
638	0.974482	0.998056	1.01181
639	0.976165	0.98656	1.00391
640	0.975928	1.01773	1.00893
641	0.984838	0.974149	0.943998
642	1.00385	1.03696	0.941716
643	1.00515	1.00579	1.00949
644	0.995764	0.984018	0.961576
645	0.968187	1.01258	0.975203
646	0.962182	1.002	0.967183
647	0.954098	0.982635	0.962873
648	0.975995	0.991738	0.960965
649	0.971752	0.943856	0.993508
650	0.967234	0.966599	0.957304
651	0.99393	0.995756	0.983223
652	0.974271	0.964421	1.01379
653	0.962323	0.985205	1.01214
654	0.962835	1.00193	0.990253
655	1.00935	1.02317	0.961075
656	0.973894	0.974849	1.03067
657	0.934452	0.986846	0.960002
658	0.995196	0.941398	0.964226
659	0.985833	0.988285	1.025
660	0.929396	0.973423	0.998509
661	0.989161	0.977651	0.934264
662	0.955117	1.01367	0.985282
663	0.979248	0.959173	1.01538
664	1.03189	0.988931	0.983977
665	0.979633	0.994523	0.970881
666	0.978702	0.996874	1.01119
667	1.02344	0.935852	1.01749
668	0.998052	1.02782	0.969591
669	1.00238	0.979216	0.977427
670	0.995648	0.977798	0.969795
671	1.01667	1.00432	0.969228
672	0.988254	1.025	0.99917
673	0.960521	1.00368	0.989821
674	0.968318	1.01891	1.0078
675	1.01811	1.02728	0.998284
676	0.996102	1.00027	0.987755
677	0.963073	1.01547	0.991766
678	1.01193	1.03603	1.00384
679	0.957637	1.00577	1.04483
680	1.01479	1.01863	1.02805
681	0.986791	0.975726	1.01646
682	1.00464	0.981984	0.979115
683	0.973533	0.965922	0.995735
684	0.968794	0.993256	1.01567
685	1.0226	0.979555	0.970124
686	0.980298	0.960901	0.98294
687	0.973836	1.00414	1.0079
688	0.992588	1.00325	0.993847
689	1.02083	0.958772	0.997125
690	0.998769	0.95714	1.0042
691	1.05435	0.996482	1.0078
692	0.990374	0.96036	1.00497
693	1.00093	0.959121	0.984539
694	0.981062	0.95579	0.978099
695	0.976829	1.02035	1.01453
696	1.01982	0.970784	0.969042
697	0.973868	0.983395	1.01823
698	1.01002	0.995765	0.989828
699	0.99812	0.985357	1.0056
700	1.03362	0.972979	0.979417
701	0.974924	0.967621	1.0159
702	1.02106	0.979268	0.958516
703	1.00894	0.990734	1.02965
704	0.998199	0.996955	1.02857
705	0.976944	0.972272	0.982271
706	1.01327	0.988949	0.989707
707	0.986525	1.0023	1.00832
708	1.00514	0.953097	0.974022
709	1.00295	0.938972	1.00068
710	0.980258	0.980306	0.980449
711	0.976534	0.998737	0.97535
712	0.982948	0.995021	1.00047
713	1.0428	0.998576	1.01733
714	0.996632	0.984791	0.991924
715	1.03099	0.978821	0.97858
716	1.00972	1.00374	1.00487
717	0.963472	1.02573	1.00044
718	0.963796	0.97916	0.961732
719	0.987641	0.977763	0.994358
720	0.977196	0.960551	0.997381
721	0.99172	0.974196	1.01477
722	0.957783	0.953365	0.970039
723	0.967224	0.965684	0.956808
724	0.997545	0.959422	1.03034
725	0.9754	0.971505	1.00357
726	1.01329	1.01521	1.00234
727	0.971558	0.954825	1.01984
728	0.9516	0.971114	0.960387
729	0.993981	0.969737	0.976019
730	0.961273	0.991394	1.00984
731	0.983914	1.01427	1.00726
732	0.945367	0.939581	1.00374
733	1.00755	1.0219	0.993308
734	1.0069	0.98452	0.983226
735	1.01244	0.982894	1.0177
736	0.960231	0.995046	1.02999
737	0.987253	0.993448	1.01133
738	0.982384	0.97117	1.01144
739	1.00422	1.01246	0.962115
740	1.02113	0.977885	0.997776
741	1.02252	0.995141	1.01244
742	1.00848	0.981224	1.01242
743	0.995569	1.00044	0.982218
744	1.02128	0.958861	1.00931
745	0.993948	0.976292	1.00267
746	1.00264	0.985965	1.02168
747	0.967342	0.995401	1.02145
748	0.982995	0.983931	1.01891
749	1.00166	1.00635	1.03998
750	0.978297	0.986364	1.00769
751	0.977032	1.00516	1.01897
752	0.991784	0.998978	1.05436
753	1.00108	1.01213	1.02466
754	1.03484	0.992441	1.01855
755	0.995427	0.966712	1.01887
756	1.00476	0.993075	0.992227
757	0.981017	0.998495	0.98152
758	0.984009	0.956358	0.9941
759	1.00574	0.972578	0.983899
760	0.979656	1.02645	1.02676
761	1.00345	0.97474	0.987459
762	1.00434	0.98455	0.997484
763	0.977224	0.997237	0.987555
764	1.00419	0.96504	1.0113
765	0.986739	1.01792	1.03417
766	1.01106	0.982591	1.03338
767	0.999454	1.00695	0.999107
768	1.01837	0.97104	1.02429
769	1.00729	1.01574	1.00164
770	1.02771	0.986799	0.99784
771	1.00194	0.967013	0.975851
772	1.01957	1.00649	1.01608
773	1.01708	1.00976	0.95821
774	1.0211	0.975048	0.975803
775	0.993466	0.98498	1.01204
776	0.99817	0.968695	1.01692
777	0.973214	1.02183	1.00694
778	0.995492	0.963623	1.00911
779	1.03584	0.996039	0.99911
780	1.00942	1.00864	0.981229
781	1.01651	0.973549	0.983039
782	0.965209	0.971989	0.986415
783	1.02431	0.983297	0.990961
784	0.988854	1.00501	1.02359
785	0.978749	0.981147	1.03846
786	0.998319	0.964206	0.987937
787	1.02676	0.969749	0.99188
788	1.01942	0.989497	0.976471
789	1.02944	1.01633	0.970465
790	0.98887	0.97567	0.980185
791	0.990297	1.00014	0.981555
792	1.02712	1.01447	0.984857
793	1.0019	0.972864	1.0075
794	1.04225	0.974001	0.976554
795	1.02426	1.01295	0.972113
796	1.00252	0.98993	1.02752
797	1.03203	0.991996	0.988204
798	0.989831	0.974402	0.990686
799	1.00073	1.00902	0.966965
800	1.00699	0.986064	0.989712
801	1.00818	1.019	0.953971
802	0.998168	0.991621	1.01643
803	0.971027	0.972789	1.0047
804	0.986301	1.01107	1.00584
805	0.996211	0.992796	0.999855
806	0.994402	1.01417	1.03303
807	1.00029	0.999134	1.00529
808	0.991337	0.956372	0.95082
809	1.01497	1.01659	1.03474
810	1.03242	0.96101	1.00519
811	0.990149	1.04499	1.01331
812	1.01291	1.0285	1.01486
813	1.00914	1.00858	1.00226
814	1.01591	1.01503	1.0137
815	1.00431	0.994986	1.01234
816	0.96473	0.985676	1.02711
817	1.01323	1.0004	0.989122
818	0.998049	0.97005	1.01054
819	0.967516	0.984909	0.993295
820	1.00276	1.0387	1.00533
821	1.00521	0.945835	1.0097
822	0.992618	0.98846	1.01976
823	1.04541	0.981386	1.02756
824	1.02383	0.968801	0.96218
825	1.04119	1.03198	0.973988
826	0.980954	1.01049	1.02614
827	1.03101	0.957915	0.980223
828	0.995557	0.990776	0.977684
829	0.97946	0.953259	1.01435
830	0.992383	1.00413	1.03157
831	1.00636	0.972045	0.971383
832	0.982468	0.979668	1.0361
833	1.02895	0.964599	1.00202
834	1.03008	0.983127	1.00189
835	0.984965	0.982516	0.988368
836	0.976059	0.961388	1.00911
837	0.990192	1.01816	0.989213
838	1.02235	0.998699	0.999121
839	1.03814	0.998376	1.03156
840	1.00243	0.957575	0.965356
841	0.992269	1.01213	1.01371
842	1.02722	0.99486	1.02818
843	1.01164	0.966347	0.960692
844	1.0071	0.999293	0.966585
845	0.997473	1.00778	1.02573
846	1.02905	0.982395	0.983679
847	1.01666	1.03265	0.985095
848	1.00956	0.99479	0.986417
849	1.02241	0.961578	0.98635
850	1.01693	0.997345	0.972988
851	1.01088	0.984618	0.995112
852	0.988747	0.972127	1.01148
853	0.996734	0.958828	0.99176
854	1.0261	0.987689	0.994163
855	1.01312	0.974298	1.03798
856	0.987183	0.981712	1.01121
857	0.978824	0.963536	1.01206
858	0.989924	0.961469	1.00927
859	0.998638	0.962203	1.01022
860	1.00033	0.978963	0.977962
861	0.985551	1.02482	1.01803
862	1.00367	0.959938	0.982565
863	0.995126	0.971267	0.988217
864	0.999445	0.940178	0.996976
865	1.01101	0.996489	0.976924
866	0.990333	0.984117	0.97211
867	1.02095	0.997416	0.975323
868	1.04206	0.973987	0.986581
869	1.03502	1.01015	1.00326
870	1.01441	1.00432	0.987985
871	1.0131	0.995948	0.958708
872	1.02592	0.973573	0.999608
873	1.03243	0.976021	0.98741
874	1.06424	0.972579	1.01452
875	1.02459	1.01505	1.00854
876	1.0429	0.991851	0.976988
877	1.03391	1.00895	0.980075
878	1.01667	0.986314	1.02447
879	1.01605	0.968803	1.05944
880	0.98067	0.984462	1.04073
881	1.01903	0.995157	0.983033
882	1.02143	0.987948	1.0096
883	1.02874	0.972646	0.993318
884	0.985176	1.01833	1.00049
885	0.989191	0.9986	0.993669
886	1.02091	0.994431	1.03952
887	1.00596	0.983393	1.00605
888	0.97645	0.979237	1.01417
889	0.992779	0.977117	0.992349
890	1.00641	1.01298	0.993871
891	1.01259	0.987169	1.0048
892	1.03327	1.00052	0.998505
893	1.01957	0.932464	0.98545
894	1.00859	1.01215	0.989482
895	0.979489	0.967015	1.02921
896	0.997144	0.947213	0.982851
897	0.982603	1.02342	1.01752
898	1.00357	0.97768	1.00463
899	1.01088	0.96916	0.997613
900	1.00117	0.981661	0.983373
901	1.0253	0.99336	0.991702
902	1.03551	0.972277	0.999369
903	0.992275	0.981184	1.04358
904	1.04782	0.957944	0.964508
905	0.999744	0.987694	0.974567
906	0.976578	0.953878	0.984893
907	0.954466	1.0135	0.967679
908	1.025	0.981933	1.01991
909	0.965878	1.01529	1.01329
910	0.991039	0.993752	0.96339
911	0.945968	1.00415	1.00181
912	1.01186	0.983708	1.00111
913	0.958508	0.951366	0.974179
914	0.987999	0.962412	0.971918
915	0.997817	0.993573	1.00474
916	1.00525	0.989996	0.997018
917	1.00491	1.02698	0.985432
918	0.989894	0.981534	0.993814
919	0.999606	0.948264	0.951967
920	1.00445	0.97579	0.984185
921	0.986096	1.02169	0.976226
922	0.995866	1.00687	1.00895
923	1.02017	1.00871	1.03533
924	1.04756	0.996964	1.02398
925	1.0423	0.992155	1.03626
926	0.992491	1.02893	0.965695
927	1.03359	0.971906	1.00102
928	1.03504	0.973213	1.01987
929	0.968735	1.01268	1.00108
930	1.01029	0.981932	1.00135
931	0.970915	0.999961	1.03064
932	1.0148	0.971878	0.969748
933	1.00012	1.02839	0.96363
934	1.03956	0.962956	0.990855
935	1.00582	1.0027	1.01947
936	0.979029	0.961621	0.956131
937	0.99152	0.982679	1.00188
938	1.01805	0.998923	0.999492
939	1.03228	0.998845	0.978401
940	0.999074	0.962856	0.976843
941	0.999247	1.01477	0.995134
942	1.0008	1.0125	0.982904
943	1.03417	0.969147	1.00393
944	1.01904	1.00732	0.989845
945	1.03149	1.0214	1.00214
946	0.966683	1.00612	1.0106
947	1.00861	1.0037	0.990285
948	0.984299	1.01158	0.991629
949	1.01254	1.01526	1.01105
950	0.955159	1.00076	0.992687
951	0.99603	0.965903	0.970235
952	1.02703	1.00294	0.993074
953	1.0293	0.969114	0.982302
954	1.01609	0.94578	0.984051
955	1.01377	0.998819	0.971213
956	0.981598	1.00024	0.981808
957	1.02666	0.965937	1.02028
958	1.01594	0.999077	0.986741
959	1.01142	0.986508	1.03799
960	1.00127	1.03703	1.05478
961	1.03003	0.986488	1.03397
962	0.994769	0.962739	0.977655
963	0.991788	0.979998	0.99444
964	0.982244	1.0061	1.00945
965	1.02464	0.983826	1.02365
966	1.00261	1.02591	0.996901
967	1.01483	1.03574	1.04643
968	1.01202	1.04773	1.00599
969	1.02232	0.994751	0.98333
970	1.01697	0.92231	0.964927
971	0.996975	0.99918	0.956
972	1.00767	1.01732	0.972861
973	0.997503	1.00464	0.967326
974	1.00048	1.01544	1.00978
975	0.973161	0.996447	1.00505
976	0.995607	1.00013	0.981062
977	0.943664	0.988237	1.03123
978	1.03226	1.00936	0.992556
979	1.01504	0.996583	0.975931
980	1.035	1.00366	0.994032
981	0.977346	1.0129	0.97765
982	1.01192	1.01066	0.999688
983	0.989332	0.990861	0.984783
984	1.00695	1.03225	1.03382
985	0.994356	0.97576	0.980257
986	1.02793	0.998858	0.935049
987	1.02733	1.00586	0.997801
988	1.01101	1.00091	0.953089
989	1.01266	0.988099	0.975777
990	1.03988	0.971004	1.0006
991	1.02409	0.999461	1.01167
992	1.04411	1.01589	1.03766
993	1.02614	1.01625	1.02934
994	1.02778	0.991327	0.963322
995	0.97566	1.03253	1.02182
996	1.01651	1.00276	1.03191
997	1.00759	1.04681	1.0299
998	1.03851	0.980595	1.03766
999	1.05292	1.00262	0.985283
1000	1.04576	1.00048	1.00161
1001	0.994608	0.990283	1.01774
1002	1.04019	1.01123	1.00512
1003	1.01165	0.997543	1.00627
1004	0.998913	0.999528	1.00359
1005	0.984181	1.00299	0.998296
1006	1.01225	0.995326	0.995953
1007	1.01207	0.985187	1.04123
1008	0.99611	1.00323	1.00754
1009	1.00783	0.979417	1.00576
1010	1.01712	0.984017	0.99493
1011	1.03877	1.01163	0.988191
1012	0.96798	0.999189	1.02159
1013	1.0274	0.965556	0.97139
1014	0.972806	1.0171	1.00414
1015	0.979009	0.978037	1.00018
1016	1.01454	1.0172	1.00768
1017	1.01748	1.0239	0.976955
1018	0.9572	1.02089	0.99047
1019	1.03237	1.0052	1.00197
1020	0.995734	0.994432	1.01285
1021	0.98546	0.981799	0.993287
1022	1.00713	1.00111	0.983222
1023	1.02977	1.01902	0.971576
1024	1.00775	1.0418	1.01122
1025	1.00561	1.03598	1.00804
1026	1.009	0.994314	0.982533
1027	1.01602	1.04073	0.982903
1028	0.998494	0.963703	0.995302
1029	1.00029	1.00309	0.987424
1030	1.00478	1.01559	0.93644
1031	0.967304	0.997231	0.985544
1032	0.999365	0.989906	0.976935
1033	0.964188	1.02684	0.987904
1034	1.0046	1.00545	1.00253
1035	0.981797	1.01465	1.01524
1036	0.992731	0.98683	1.05279
1037	0.943793	0.959605	0.995313
1038	0.969066	1.01513	1.01807
1039	0.979571	1.00268	1.01566
1040	0.971935	0.976782	1.00833
1041	1.0044	0.98923	0.974942
1042	0.986701	1.04331	1.03774
1043	1.01103	1.01535	0.988997
1044	1.02078	0.968738	1.00965
1045	1.01037	0.962241	0.961215
1046	0.992103	1.00307	1.04481
1047	0.97938	1.00231	0.977937
1048	1.01836	0.999934	1.02729
1049	1.01425	0.961227	1.01369
1050	0.988136	1.04098	0.993379
1051	1.02335	0.990094	1.01744
1052	1.02483	1.02429	0.990559
1053	0.994452	1.00729	0.989049
1054	0.99009	1.04202	1.02669
1055	0.986904	1.01693	1.01311
1056	1.05877	1.00267	1.02961
1057	1.0406	0.982827	1.02743
1058	1.00757	1.00399	1.03815
1059	1.0166	1.03095	1.01038
1060	1.00124	0.975414	0.954147
1061	0.999072	1.00424	1.03967
1062	1.01095	0.973131	0.976683
1063	0.996423	0.975509	1.03245
1064	1.02993	1.02808	1.0523
1065	1.05894	0.995621	1.03012
1066	0.997976	0.989132	1.00658
1067	1.02903	1.0367	1.02783
1068	1.03472	1.00687	1.01549
1069	0.998741	0.989054	1.02718
1070	1.02989	1.00543	0.983731
1071	1.00651	1.00556	1.02387
1072	1.0463	1.01858	1.05316
1073	1.06193	0.994435	0.983194
1074	1.09785	0.983917	1.02692
1075	1.00738	1.01654	0.998743
1076	1.01409	1.0014	1.0225
1077	1.04368	0.976751	0.998629
1078	0.997822	1.0302	0.997108
1079	1.01118	1.01462	1.02458
1080	1.03686	0.96772	0.981188
1081	1.04433	0.993044	0.981903
1082	1.01877	1.00317	0.997565
1083	1.00635	0.943313	0.973645
1084	1.00523	0.994111	1.01536
1085	1.04105	1.01595	1.02007
1086	1.03023	0.970941	1.0258
1087	1.02329	1.03385	0.987822
1088	1.01525	1.00849	1.01856
1089	1.0249	0.996909	1.04093
1090	1.00472	1.03563	1.0011
1091	1.02634	1.01279	1.0192
1092	0.990334	0.98003	0.985479
1093	1.00927	1.02537	1.00395
1094	1.02089	0.960742	0.976842
1095	1.03398	0.986783	0.989902
1096	1.03671	0.983866	0.992183
1097	0.968221	1.01319	0.99197
1098	1.0409	0.956959	0.995178
1099	1.01476	0.998974	0.979751
1100	1.00351	0.973842	1.02114
1101	0.992018	0.965758	1.05143
1102	1.03474	1.01462	1.0245
1103	0.992524	0.96819	1.02529
1104	1.02558	0.996137	0.98535
1105	1.05059	0.990644	0.974542
1106	1.03193	1.00938	0.966165
1107	0.978178	1.02316	0.986675
