# Supplementary figures and images for: The photosystem I supercomplex from a primordial green alga Ostreococcus tauri harbors three light-harvesting complex trimers
Source: eLife journal article supplement (doi:10.7554/elife.84488), 2023-03-23

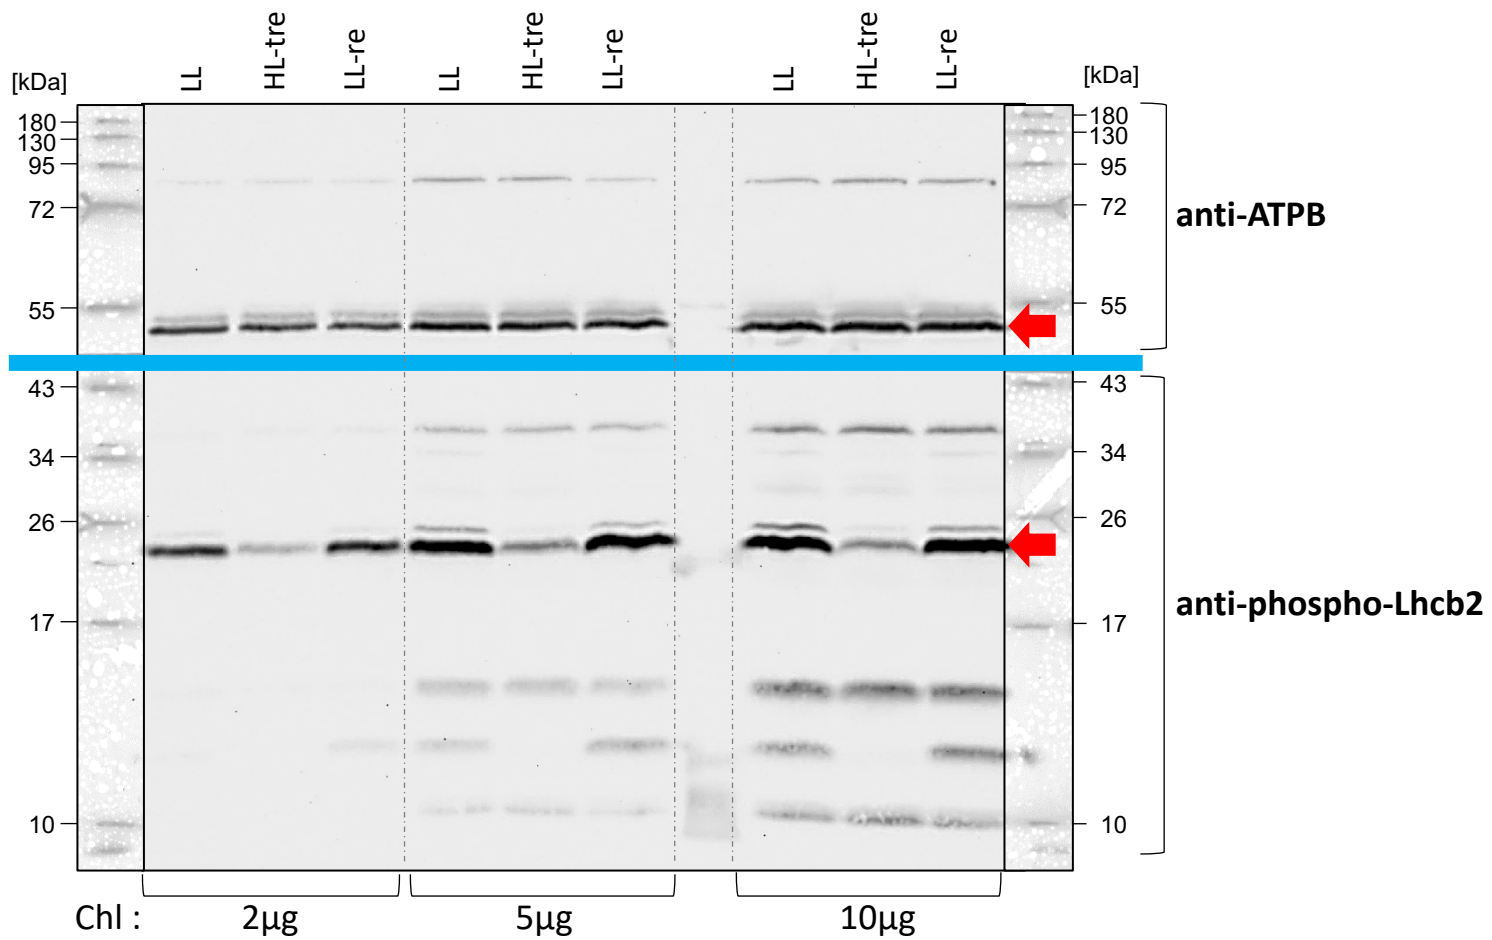

Supplement: supp [file elife-84488-supp-v1.zip]

A1 A3 A3L A4 M

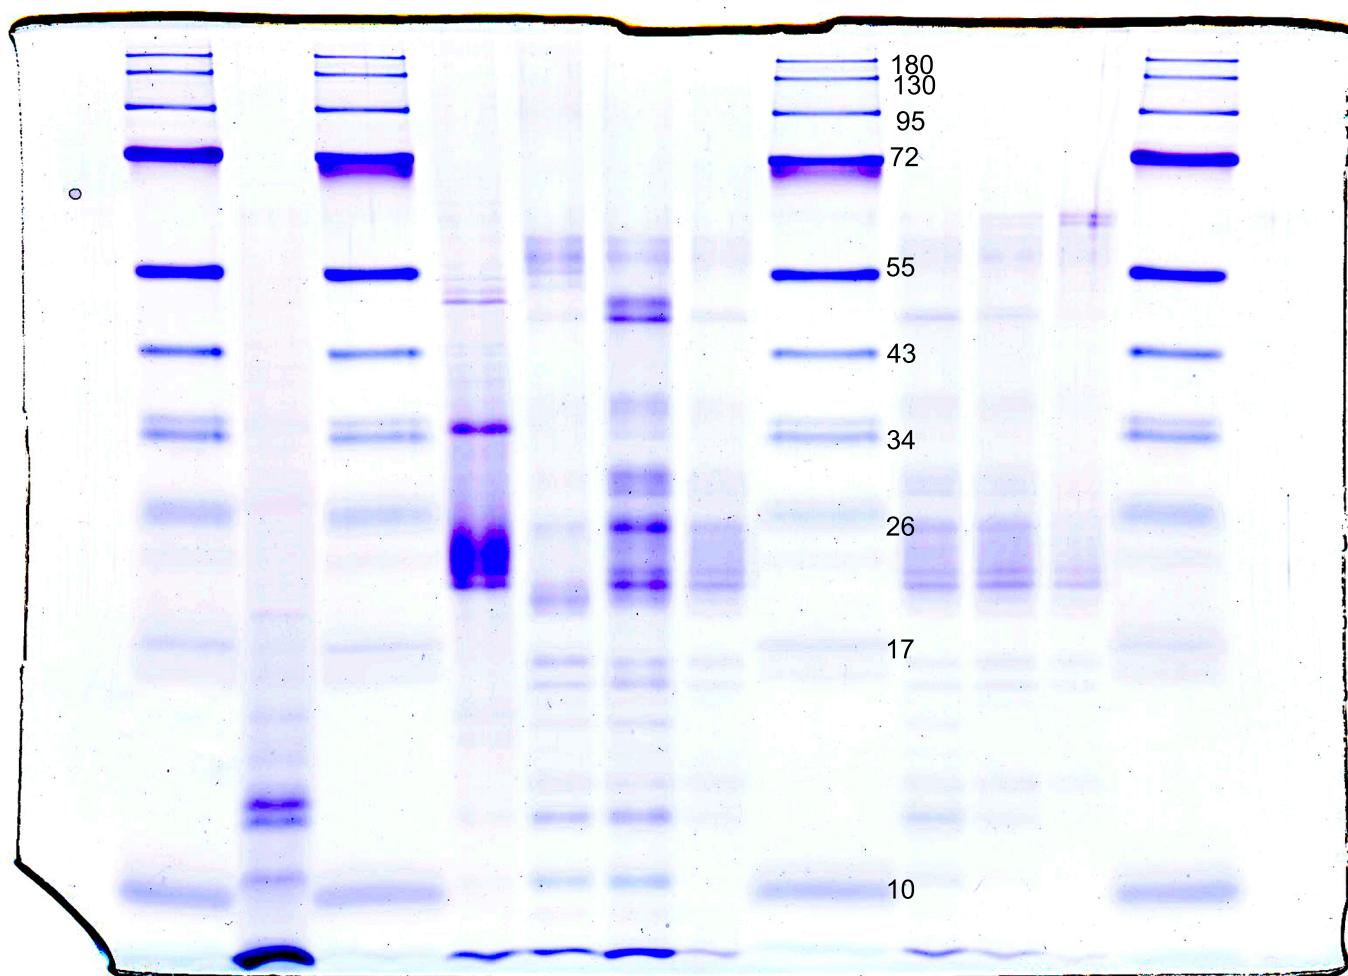

Supplement: supp [file elife-84488-supp-v1.zip]

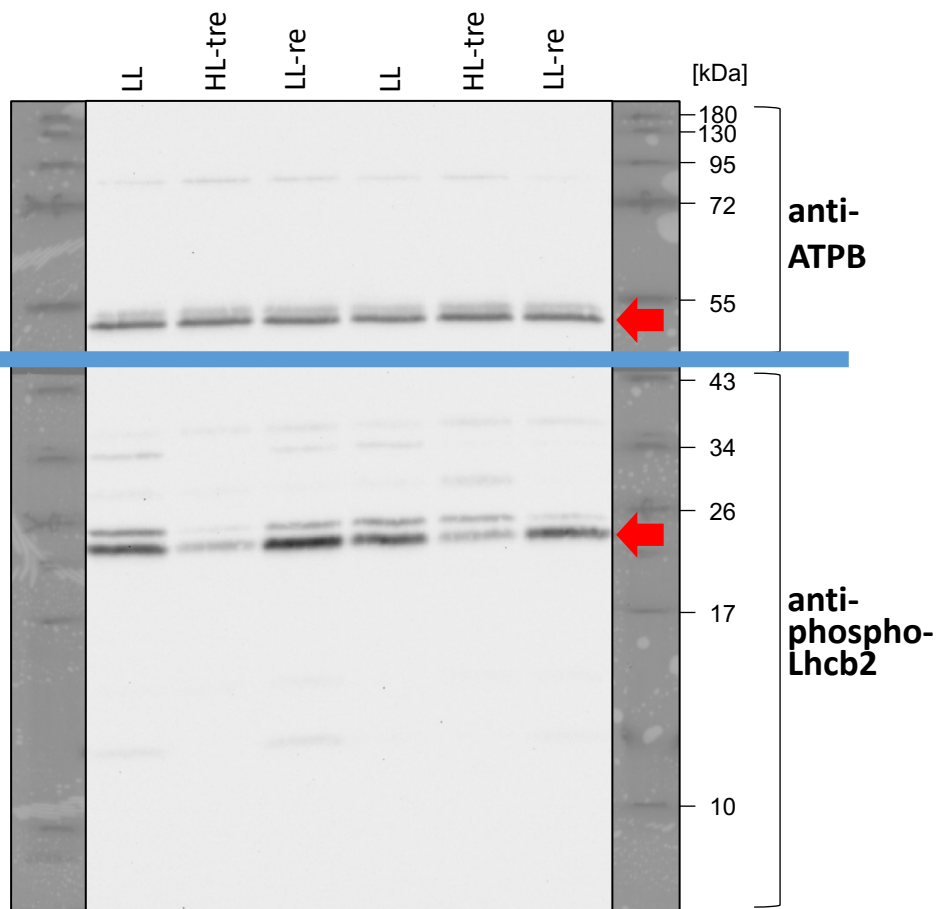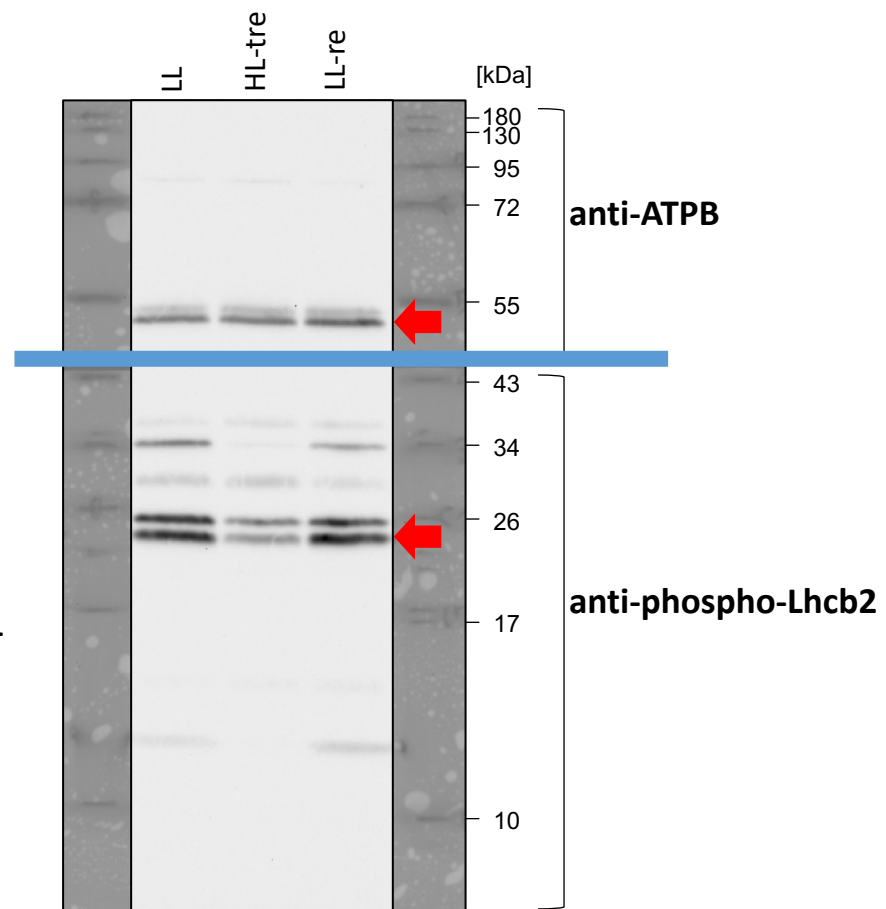

Supplement: supp [file elife-84488-supp-v1.zip]

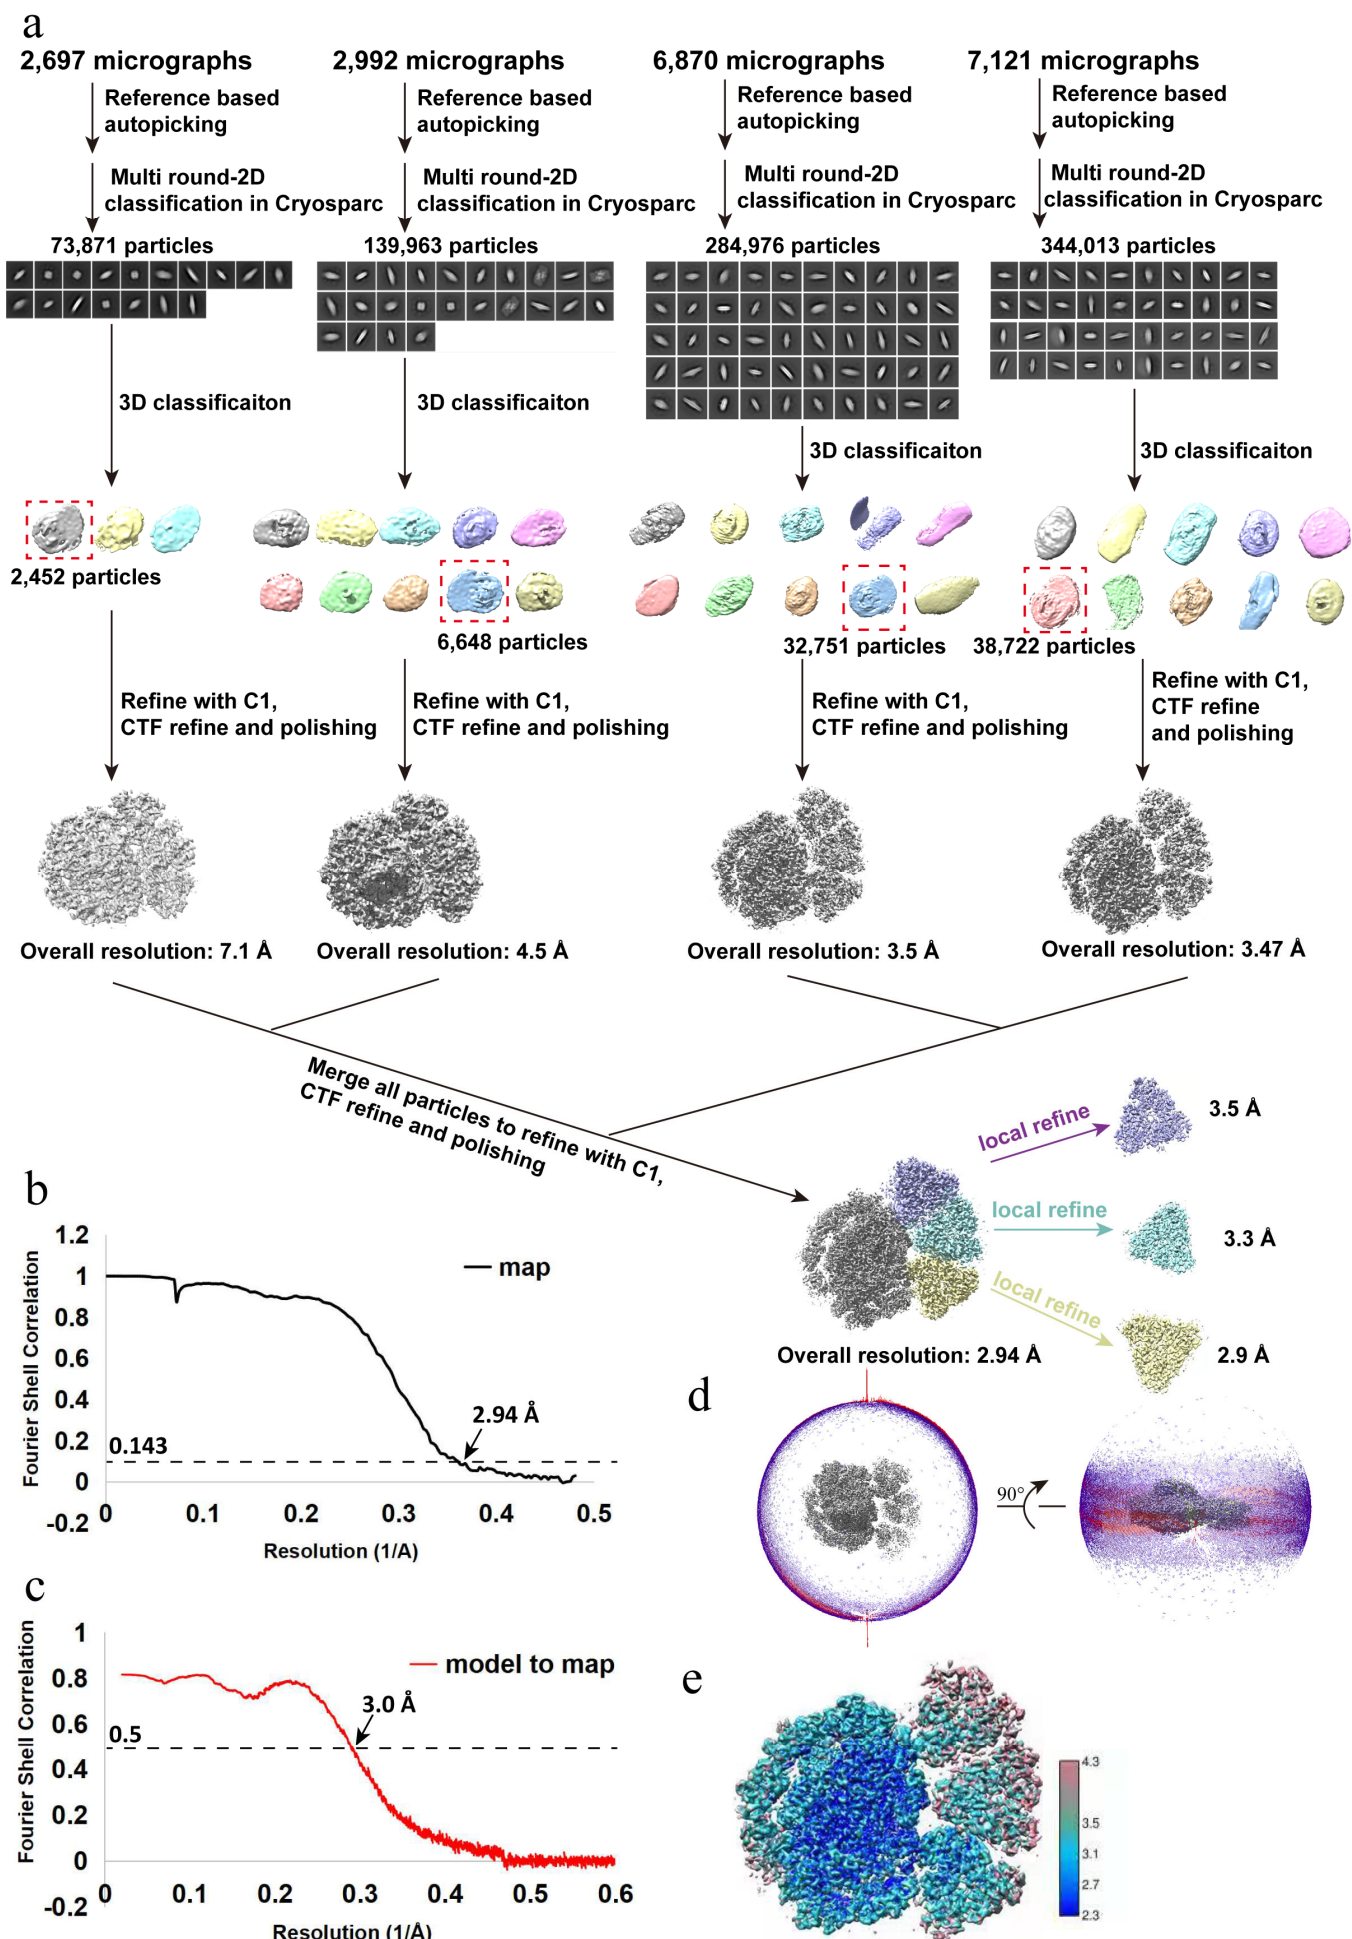

Supplement: supp [file elife-84488-supp-v1.zip › elife_poa_e84488_Figure_2_figure_supplement_1.pdf]
